# Supplementary material for: Genome-Wide Identification of Mitogen-Activated Protein Kinase Gene Family across Fungal Lineage Shows Presence of Novel and Diverse Activation Loop Motifs
Source: PubMed Central journal article supplement (PMC4769017; doi:10.1371/journal.pone.0149861), 2016-02-26
Supplement: pone.0149861.s002.pdf [file pone.0149861.s002.pdf]

|         |     |        |     |     |            |          |      |            |            |            |            |           |     |         |            |            |           |           |     |     |
|---------|-----|--------|-----|-----|------------|----------|------|------------|------------|------------|------------|-----------|-----|---------|------------|------------|-----------|-----------|-----|-----|
| 277624  | --- | TDLHRV | --- | IRT | -QELSDDH-  | ---      | IQY  | FTYQ       | ---        | ---        | ---        | TLRA      | --- | LKALHSA | DVLRHDLKPS | NLLNANCDL  | KICDFGLAR | ---       | --- |     |
| 77457   | --- | TDLHRV | --- | IRT | -QELSDDH-  | ---      | COY  | FIYQ       | ---        | ---        | ---        | TLRA      | --- | LKALHSA | DVLRHDLKPS | NLLNANCDL  | KICDFGLAR | ---       | --- |     |
| 89431   | --- | TDLHRV | --- | IRT | -QELSDDH-  | ---      | COY  | FIYQ       | ---        | ---        | ---        | TLRA      | --- | LKALHSA | DVLRHDLKPS | NLLNANCDL  | KICDFGLAR | ---       | --- |     |
| 484632  | --- | TDLHRV | --- | IRT | -QELSDDH-  | ---      | COY  | FIYQ       | ---        | ---        | ---        | TLRA      | --- | LKALHSA | DVLRHDLKPS | NLLNANCDL  | KICDFGLAR | ---       | --- |     |
| 161998  | --- | TMHVR  | --- | IRT | -QELSDDH-  | ---      | COY  | FIYQVSNITS | DFITSIRAIF | SLFTASLRAH | CDAACPAGAG | LDANITLRA | --- | LKALHSA | DVLRHDLKPS | NLLNANCDL  | KICDFGLAR | ---       | --- |     |
| 324877  | --- | TDLHRV | --- | IRT | -QELSDDH-  | ---      | COY  | FIYQVRPLPP | SL--SIRSGR | SLST       | ---        | ---       | --- | LKALHSA | DVLRHDLKPS | NLLNANCDL  | KICDFGLAR | ---       | --- |     |
| 117759  | --- | TDLHRV | --- | IRS | -QELSDDH-  | ---      | COY  | FIYQ       | ---        | ---        | ---        | ---       | --- | LKALHSA | NVLRHDLKPS | NLLNANCDL  | KICDFGLAR | ---       | --- |     |
| 489827  | --- | TMHVR  | --- | IRT | -QELSDDH-  | ---      | COY  | FIYQ       | ---        | ---        | ---        | ---       | --- | TLRG    | -LKALHSA   | NVLRHDLKPS | NLLNANCDL | KICDFGLAR | --- | --- |
| 115935  | --- | TMHVR  | --- | IRT | -QELSDDH-  | ---      | COY  | FIYQ       | ---        | ---        | ---        | ---       | --- | TLRG    | -LKALHSA   | NVLRHDLKPS | NLLNANCDL | KICDFGLAR | --- | --- |
| 482781  | --- | TMHVR  | --- | IRT | -QELSDDH-  | ---      | COY  | FIYQ       | ---        | ---        | ---        | ---       | --- | TLRG    | -LKALHSA   | NVLRHDLKPS | NLLNANCDL | KICDFGLAR | --- | --- |
| 545919  | --- | TMHVR  | --- | IRT | -QELSDDH-  | ---      | COY  | FIYQ       | ---        | ---        | ---        | ---       | --- | TLRG    | -LKALHSA   | NVLRHDLKPS | NLLNANCDL | KICDFGLAR | --- | --- |
| 6536562 | --- | TDLHRV | --- | IHT | -QELSDDH-  | ---      | COY  | FIYQ       | ---        | ---        | ---        | ---       | --- | TLRA    | -LKTLSHA   | DVLRHDLKPS | NLLNANCDL | KICDFGLAR | --- | --- |
| 309997  | --- | TDLHRV | --- | IRT | -QELSDDH-  | ---      | COY  | FIYQ       | ---        | ---        | ---        | ---       | --- | TVRG    | -LKAHLTA   | DVLRHDLKPS | NLLNANCDL | KICDFGLAR | --- | --- |
| 316873  | --- | TDLHRV | --- | IRT | -QELSDDH-  | ---      | COY  | FIYQ       | ---        | ---        | ---        | ---       | --- | TVRG    | -LKAHLTA   | DVLRHDLKPS | NLLNANCDL | KICDFGLAR | --- | --- |
| 429267  | --- | TDLHRV | --- | IRT | -QELSDDH-  | ---      | COY  | FIYQ       | ---        | ---        | ---        | ---       | --- | TLRA    | -LKAHLTA   | DVLRHDLKPS | NLLNANCDL | KICDFGLAR | --- | --- |
| 103465  | --- | TMHQA  | --- | IQT | -QELSDDH-  | ---      | IQY  | FIYQ       | ---        | ---        | ---        | ---       | --- | SLRG    | -LKYVHSA   | GVVHRDLKPS | NLLNANCDL | KICDFGLAR | --- | --- |
| 167039  | --- | TDLHKA | --- | IVS | -QELSDDH-  | ---      | VOY  | FIYQ       | ---        | ---        | ---        | ---       | --- | TLRG    | -LKALHSA   | NVLRHDLKPS | NLLNANCDL | KICDFGLAR | --- | --- |
| 8637    | --- | ADLHTV | --- | IQT | -QELSDDH-  | ---      | IKY  | FIYQ       | ---        | ---        | ---        | ---       | --- | ILKG    | -VKYLHSC   | GVVHRDLKPA | NLLNANCDL | KICDFGLAR | --- | --- |
| 65963   | --- | TDLHVV | --- | IRS | -QELSDDH-  | ---      | VOY  | LMVQ       | ---        | ---        | ---        | ---       | --- | ALKG    | -VKCLHSC   | GVVHRDLKPA | NLLNANCDL | KICDFGLAR | --- | --- |
| 246409  | --- | TDLHRV | --- | IRT | -QELSDDH-  | ---      | COY  | FIYQ       | ---        | ---        | ---        | ---       | --- | TLRA    | -LKALHSA   | DVLRHDLKPS | NLLNANCDL | KICDFGLAR | --- | --- |
| 246352  | --- | TDLHRV | --- | IRT | -QELSDDH-  | ---      | COY  | FIYQ       | ---        | ---        | ---        | ---       | --- | TLRA    | -LKALHSA   | DVLRHDLKPS | NLLNANCDL | KICDFGLAR | --- | --- |
| 668220  | --- | TMHVR  | --- | IRT | -QELSDDH-  | ---      | AOY  | FIYQ       | ---        | ---        | ---        | ---       | --- | TLRA    | -LKALHSA   | DVLRHDLKPS | NLLNANCDL | KVDFGLAR  | --- | --- |
| 619500  | --- | TMHVR  | --- | IRT | -QELSDDH-  | ---      | AOY  | FIYQ       | ---        | ---        | ---        | ---       | --- | TLRA    | -LKALHSA   | DVLRHDLKPS | NLLNANCDL | KVDFGLAR  | --- | --- |
| 64492   | --- | TMHVR  | --- | IRT | -QELSDDH-  | ---      | AOY  | FIYQ       | ---        | ---        | ---        | ---       | --- | TLRA    | -LKALHSA   | DVLRHDLKPS | NLLNANCDL | KVDFGLAR  | --- | --- |
| 80250   | --- | TMHVR  | --- | IRT | -QELSDDH-  | ---      | SOY  | FIYQ       | ---        | ---        | ---        | ---       | --- | TLRG    | -LKALHSA   | AVLRHDLKPS | NLLNANCDL | KICDFGLAR | --- | --- |
| 21917   | --- | TMHVR  | --- | IRT | -QELSDDH-  | ---      | COY  | FIYQ       | ---        | ---        | ---        | ---       | --- | TLRG    | -LKALHSA   | NVLRHDLKPS | NLLNANCDL | KICDFGLAR | --- | --- |
| 600175  | --- | TDLHRV | --- | IRT | -QELSDDH-  | ---      | COY  | FIYQ       | ---        | ---        | ---        | ---       | --- | TLRA    | -LKALHSA   | DVLRHDLKPS | NLLNANCDL | KICDFGLAR | --- | --- |
| 721307  | --- | TDLHRV | --- | IRT | -QELSDDH-  | ---      | COY  | FIYQ       | ---        | ---        | ---        | ---       | --- | TLRA    | -LKALHSA   | DVLRHDLKPS | NLLNANCDL | KICDFGLAR | --- | --- |
| 847084  | --- | TDLHRV | --- | IRT | -QELSDDH-  | ---      | COY  | FIYQ       | ---        | ---        | ---        | ---       | --- | TLRA    | -LKALHSA   | DVLRHDLKPS | NLLNANCDL | KVDFGLAR  | --- | --- |
| 280696  | --- | TMHVR  | --- | IRT | -QELSDDH-  | ---      | COY  | FIYQ       | ---        | ---        | ---        | ---       | --- | TLRA    | -LKAMHSA   | NVLRHDLKPS | NLLNANCDL | KVDFGLAR  | --- | --- |
| 908144  | --- | TMHVR  | --- | IRT | -QELSDDH-  | ---      | COY  | FIYQ       | ---        | ---        | ---        | ---       | --- | TLRA    | -LKAMHSA   | NVLRHDLKPS | NLLNANCDL | KVDFGLAR  | --- | --- |
| 148879  | --- | TMHVR  | --- | IRT | -QELSDDH-  | ---      | COY  | FIYQ       | ---        | ---        | ---        | ---       | --- | TLRA    | -LKAMHSA   | NVLRHDLKPS | NLLNANCDL | KVDFGLAR  | --- | --- |
| 102030  | --- | TDLHRI | --- | IHT | -QELSDDH-  | ---      | VOY  | FIYQ       | ---        | ---        | ---        | ---       | --- | TLRA    | -LKYTHSC   | NVLRHDLKPA | NLLNANCDL | KVDFGLAR  | --- | --- |
| 92334   | --- | TDLHRI | --- | IHT | -QELSDDH-  | ---      | VOY  | FIYQ       | ---        | ---        | ---        | ---       | --- | TLRA    | -LKYTHSC   | NVLRHDLKPA | NLLNANCDL | KVDFGLAR  | --- | --- |
| 146634  | --- | TDLHRV | --- | IYS | KKIKTMDH-  | ---      | IQY  | FVYQ       | ---        | ---        | ---        | ---       | --- | TLRA    | -LKYVHSA   | NVLRHDLKPS | NLLNANCDL | KICDFGLAR | --- | --- |
| 72485   | --- | TDLHAI | --- | IRS | QGLSDQH-   | ---      | VOY  | FVYQ       | ---        | ---        | ---        | ---       | --- | TVRG    | -LKWVHSA   | GIHVRDLKPG | NLLNANCDL | KVDFGLAR  | --- | --- |
| 124061  | --- | DHLHLG | --- | YHQ | AAYLGVVHGD | L--      | LQY  | FVYQ       | ---        | ---        | ---        | ---       | --- | TLRA    | -LKSITHSA  | DVLRHDLKPA | NLLNANCDL | KVDFGLAR  | --- | --- |
| 109792  | --- | TMHVR  | --- | IRT | -QELSDDH-  | ---      | COY  | FIYQ       | ---        | ---        | ---        | ---       | --- | TLRA    | -LKALHSA   | DVLRHDLKPS | NLLNANCDL | KVDFGLAR  | --- | --- |
| 408982  | --- | TMHVR  | --- | IRT | -QELSDDH-  | ---      | AOY  | FVYQ       | ---        | ---        | ---        | ---       | --- | TLRA    | -LKALHSA   | DVLRHDLKPS | NLLNANCDL | KVDFGLAR  | --- | --- |
| 149279  | --- | TMHVR  | --- | IRT | -QELSDDH-  | ---      | AOY  | FIYQ       | ---        | ---        | ---        | ---       | --- | TLRA    | -LKALHSA   | DVLRHDLKPS | NLLNANCDL | KVDFGLAR  | --- | --- |
| 13526   | --- | TDLHRV | --- | IRT | -QELSDDH-  | ---      | COY  | FIYQ       | ---        | ---        | ---        | ---       | --- | TLRA    | -LKALHSA   | DVLRHDLKPS | NLLNANCDL | KICDFGLAR | --- | --- |
| 465497  | --- | TDLHRV | --- | IRT | -QELSDDH-  | ---      | COY  | FIYQ       | ---        | ---        | ---        | ---       | --- | TLRA    | -LKALHSA   | DVLRHDLKPS | NLLNANCDL | KICDFGLAR | --- | --- |
| 216389  | --- | TDLHRV | --- | IRT | -QELSDDH-  | ---      | COY  | FIYQ       | ---        | ---        | ---        | ---       | --- | TLRA    | -LKALHSA   | DVLRHDLKPS | NLLNANCDL | KVDFGLAR  | --- | --- |
| 17191   | --- | TDLHRV | --- | VRS | -QELSDDH-  | ---      | AOY  | FVYQ       | ---        | ---        | ---        | ---       | --- | TLRA    | -LKVHSA    | DVLRHDLKPS | NLLNANCDL | KVDFGLAR  | --- | --- |
| 530963  | --- | TDLHRL | --- | LTS | -RPLEKQF-  | ---      | IQY  | FVYQ       | ---        | ---        | ---        | ---       | --- | ILRG    | -LKYVHSA   | GVVHRDLKPS | NLLNANCDL | KICDFGLAR | --- | --- |
| 84099   | --- | TDLHRL | --- | LTS | -RPLEKQF-  | ---      | IQY  | FIYQ       | ---        | ---        | ---        | ---       | --- | ILRG    | -LKYVHSA   | GVVHRDLKPS | NLLNANCDL | KICDFGLAR | --- | --- |
| 928715  | --- | SLLNAL | --- | IRT | -QELSDDH-  | ---      | COY  | FIYQ       | ---        | ---        | ---        | ---       | --- | ALRG    | -LKALHSA   | GLHVRDLKPS | NLLNANCDL | KICDFGLAR | --- | --- |
| 480104  | --- | TDLHRV | --- | IRT | -QELSDDH-  | ---      | COY  | FVYQ       | ---        | ---        | ---        | ---       | --- | TLRA    | -LKSITHA   | DVLRHDLKPA | NLLNANCDL | KVDFGLAR  | --- | --- |
| 37144   | --- | TDLHRV | --- | IRT | -QELSDDH-  | ---      | COY  | FIYQ       | ---        | ---        | ---        | ---       | --- | TLRA    | -LKSITHA   | DVLRHDLKPA | NLLNANCDL | KVDFGLAR  | --- | --- |
| 993637  | --- | TDLHRV | --- | IRT | -QELSDDH-  | ---      | COY  | FIYQ       | ---        | ---        | ---        | ---       | --- | TLRA    | -LKSITHA   | DVLRHDLKPA | NLLNANCDL | KVDFGLAR  | --- | --- |
| 706327  | --- | TDLHRV | --- | IRT | -QELSDDH-  | ---      | COY  | FVYQ       | ---        | ---        | ---        | ---       | --- | TLRA    | -LKMTHSA   | DVLRHDLKPA | NLLNANCDL | KVDFGLAR  | --- | --- |
| 5366    | --- | TDLHRV | --- | IRT | -QELSDDH-  | ---      | COY  | FVYQ       | ---        | ---        | ---        | ---       | --- | TLRA    | -LKMTHSA   | DVLRHDLKPA | NLLNANCDL | KVDFGLAR  | --- | --- |
| 144998  | --- | TMHVR  | --- | IRT | -QELSDDH-  | ---      | AOY  | FIYQ       | ---        | ---        | ---        | ---       | --- | TLRA    | -LKALHSA   | DVLRHDLKPS | NLLNANCDL | KVDFGLAR  | --- | --- |
| 232199  | --- | TMHVR  | --- | IRT | -QELSDDH-  | ---      | AOY  | FIYQ       | ---        | ---        | ---        | ---       | --- | TLRA    | -LKALHSA   | DVLRHDLKPS | NLLNANCDL | KVDFGLAR  | --- | --- |
| 60405   | --- | TMHVR  | --- | IRT | -QELSDDH-  | ---      | AOY  | FIYQ       | ---        | ---        | ---        | ---       | --- | TLRA    | -LKALHSA   | DVLRHDLKPS | NLLNANCDL | KVDFGLAR  | --- | --- |
| 572633  | --- | TMHVR  | --- | IRT | -QELSDDH-  | ---      | AOY  | FIYQ       | ---        | ---        | ---        | ---       | --- | TLRA    | -LKALHSA   | DVLRHDLKPS | NLLNANCDL | KVDFGLAR  | --- | --- |
| 37912   | --- | TMHVR  | --- | IRT | -QELSDDH-  | ---      | AOY  | FIYQ       | ---        | ---        | ---        | ---       | --- | TLRA    | -LKALHSA   | DVLRHDLKPS | NLLNANCDL | KVDFGLAR  | --- | --- |
| 819552  | --- | TMHVR  | --- | IRT | -QELSDDH-  | ---      | AOY  | FIYQ       | ---        | ---        | ---        | ---       | --- | TLRA    | -LKALHSA   | DVLRHDLKPS | NLLNANCDL | KVDFGLAR  | --- | --- |
| 1026351 | --- | TDLHRV | --- | IRT | -QELSDDH-  | ---      | COY  | FIYQ       | ---        | ---        | ---        | ---       | --- | TLRA    | -LKALHSA   | DVLRHDLKPS | NLLNANCDL | KICDFGLAR | --- | --- |
| 352542  | --- | TDLHRV | --- | IRT | -QELSDDH-  | ---      | COY  | FIYQ       | ---        | ---        | ---        | ---       | --- | TLRA    | -LKALHSA   | DVLRHDLKPS | NLLNANCDL | KICDFGLAR | --- | --- |
| 42114   | --- | TDLHRV | --- | IRT | -QELSDDH-  | ---      | COY  | FIYQ       | ---        | ---        | ---        | ---       | --- | TLRA    | -LKALHSA   | DVLRHDLKPS | NLLNANCDL | KVDFGLAR  | --- | --- |
| 204011  | --- | TMHVR  | --- | IRT | -QELSDDH-  | ---      | COY  | FIYQ       | ---        | ---        | ---        | ---       | --- | TLRG    | -LKALHSA   | NVLRHDLKPS | NLLNANCDL | KICDFGLAR | --- | --- |
| 46962   | --- | TMHVR  | --- | IRT | -QELSDDH-  | ---      | COY  | FIYQ       | ---        | ---        | ---        | ---       | --- | TLRA    | -LKAMHSA   | NVLRHDLKPS | NLLNANCDL | KVDFGLAR  | --- | --- |
| 3452    | --- | TMHVR  | --- | IRT | -QELSDDH-  | ---      | COY  | FIYQ       | ---        | ---        | ---        | ---       | --- | TLRA    | -LKAMHSA   | NVLRHDLKPS | NLLNANCDL | KVDFGLAR  | --- | --- |
| 1531701 | --- | TMHVR  | --- | IRT | -QELSDDH-  | ---      | COY  | FIYQ       | ---        | ---        | ---        | ---       | --- | TLRA    | -LKAMHSA   | NVLRHDLKPS | NLLNANCDL | KVDFGLAR  | --- | --- |
| 375250  | --- | MHRV   | --- | IRT | -QELSDDH-  | ---      | COY  | FIYQ       | ---        | ---        | ---        | ---       | --- | TLRA    | -LKAMHSA   | NVLRHDLKPS | NLLNANCDL | KVDFGLAR  | --- | --- |
| 391393  | --- | TMHVR  | --- | IRT | -QELSDDH-  | ---      | COY  | FIYQ       | ---        | ---        | ---        | ---       | --- | TLRA    | -LKALHSA   | NVLRHDLKPS | NLLNANCDL | KVDFGLAR  | --- | --- |
| 518679  | --- | TMHVR  | --- | IRT | -QELSDDH-  | ---      | COY  | FIYQ       | ---        | ---        | ---        | ---       | --- | TLRA    | -LKAMHSA   | NVLRHDLKPS | NLLNANCDL | KVDFGLAR  | --- | --- |
| 1272884 | --- | TMHVR  | --- | IRT | -QELSDDH-  | ---      | COY  | FIYQ       | ---        | ---        | ---        | ---       | --- | TLRA    | -LKAMHSA   | NVLRHDLKPS | NLLNANCDL | KVDFGLAR  | --- | --- |
| 108249  | --- | TDLHRV | --- | IHT | -QELSDDH-  | ---      | COY  | FIYQ       | ---        | ---        | ---        | ---       | --- | TLRA    | -LKYVHSA   | NVLRHDLKPS | NLLNANCDL | KVDFGLAR  | --- | --- |
| 111885  | --- | TDLSKV | --- | ISN | SRDSFLQTVG | RTVTLLEH | IQY  | FIYQ       | ---        | ---        | ---        | ---       | --- | ILRG    | -LKALHSA   | KVLRHDLKPS | NLLNANCDL | KICDFGLAR | --- | --- |
| 228039  | --- | SDLHQI | --- | IHT | C--YLQD    | DHLQY    | FIYQ | ---        | ---        | ---        | ---        | ---       | --- | ILRG    | -LKYVHSA   | NVLRHDLKPS | NLLNANCDL | KICDFGLAR | --- | --- |
| 117728  | --- | TDLHAI | --- | IHT | GI--LHVH   | KQY      | ITVQ | ---        | ---        | ---        | ---        | ---       | --- | TLRA    | -LKYVHSA   | NVLRHDLKPS | NLLNANCDL | KVDFGLAR  | --- | --- |
| 267276  | --- | TMHVR  | --- | IRT | -QELSDDH-  | ---      | AOY  | FIYQ       | ---        | ---        | ---        | ---       | --- | TLRA    | -LKALHSA   | DVLRHDLKPS | NLLNANCDL | KVDFGLAR  | --- | --- |
| 295270  | --- | TMHVR  | --- | IRT | -QELSDDH-  | ---      | AOY  | FIYQ       | ---        | ---        | ---        | ---       | --- | TLRA    | -LKALHSA   | DVLRHDLKPS | NLLNANCDL | KVDFGLAR  | --- | --- |
| 174214  | --- | TDLHRL | --- | LTS | -RPLEKQF-  | ---      | IQY  | FVYQ       | ---        | ---        | ---        | ---       | --- | ILRG    | -LKYVHSA   | GVVHRDLKPS | NLLNANCDL | KICDFGLAR | --- | --- |
| 111562  | --- | TDLHRL | --- | LTS | -RPLEKQF-  | ---      | IQY  | FIYQ       | ---        | ---        | ---        | ---       | --- | ILRG    | -LKYVHSA   | GVVHRDLKPS | NLLNANCDL | KICDFGLAR | --- | --- |
| 385026  | --- | TDLHRL | --- | LTS | -RPLEKQF-  | ---      | IQY  | FIYQ       | ---        | ---        | ---        | ---       | --- | ILRG    | -LKYVHSA   | GVVHRDLKPS | NLLNANCDL | KICDFGLAR | --- | --- |
| 4793    | --- | TDLHRL | --- | LTS | -RPLEKQF-  | ---      | IQY  | FIYQ       | ---        | ---        | ---        | ---       | --- | ILRG    | -LKYVHSA   | GVVHRDLKPS | NLLNANCDL | KICDFGLAR | --- | --- |
| 91658   | --- | TDLHRL | --- | LTS | -RPLEKQF-  | ---      | IQY  | FIYQ       | ---        | ---        | ---        | ---       | --- | ILRG    | -LKYVHSA   | GVVHRDLKPS | NLLNANCDL | KICDFGLAR | --- | --- |
| 361397  | --- | TDLHRL | --- | LTS | -RPLEKQF-  | ---      | IQY  | FIYQ       | ---        | ---        | ---        | ---       | --- | ILRG    | -LKYVHSA   | GVVHRDLKPS | NLLNANCDL | KICDFGLAR | --- | --- |
| 368356  | --- | TDLHRL | --- | LTS | -RPLEKQF-  | ---      | IQ   |            |            |            |            |           |     |         |            |            |           |           |     |     |

















|         |           |           |           |     |     |            |         |    |   |     |     |     |     |          |   |     |           |           |
|---------|-----------|-----------|-----------|-----|-----|------------|---------|----|---|-----|-----|-----|-----|----------|---|-----|-----------|-----------|
| 100890  | LNQILQILG | ---TPDDAT | LSRIGSERA | --- | QMY | IRS-LPYMPK | V-SWERT | -F | P | --- | NAT | PLA | --- | LDLLEKM  | L | --- | -DFDPSRI  | TVEALHPY  |
| 288633  | LNQILVVLG | ---TPDDHT | IGRVGSERA | --- | QLY | IKS-LDKDFE | I-PLCLR | -Y | P | --- | NAS | PLA | --- | LDLLEKM  | L | --- | -TFDPTRI  | TIEVALHPY |
| 69432   | LNQILHYLG | ---TPPEET | LRRVGSRA  | --- | QDY | IRS-LPIKPR | V-PFSTL | -Y | P | --- | RAN | PLA | --- | LDLLEQM  | L | --- | -HFDPIKRI | SCEQALHPY |
| 602729  | LNQILHYLG | ---TPSEDT | LRRVGSRA  | --- | QDY | IRS-LPIKPR | I-SFANT | -Y | P | --- | KAN | PLA | --- | LDLLEQM  | L | --- | -CFDPAKRI | SCEQALHPY |
| 166223  | LNQILHYLG | ---TPSEDT | LRRVGSRA  | --- | QDY | IRS-LPIKPR | V-PFSTL | -Y | P | --- | NAN | PLA | --- | LDLLEQM  | L | --- | -CFDPAKRI | SCEQALHPY |
| 1111368 | LNQILHYLG | ---TPSEDT | LRRVGSRA  | --- | QDY | IRS-LPIKPR | V-PFSTL | -Y | P | --- | HAN | PLA | --- | LDLLESNL | L | --- | -CFDPAKRI | SCEQALHPY |
| 7180514 | LNQILHYLG | ---TPSEDT | LRRVGSRA  | --- | QDY | IRS-LPIKPR | V-PFSTL | -F | P | --- | HAN | PLA | --- | LDLLEQM  | L | --- | -CFDPAKRI | SCEQALHPY |
| 671172  | LNQILHYLG | ---TPSEDT | LRRVGSRA  | --- | QDY | IRS-LPIKPR | V-PFSTL | -F | P | --- | QAN | PLA | --- | LDLLEQM  | L | --- | -CFDPAKRI | SCEQALHPY |
| 695955  | LNQILHYLG | ---TPSEDT | LRRVGSRA  | --- | QDY | IRS-LPIKPR | V-PFSTL | -F | P | --- | QAN | PLA | --- | LDLLEQM  | L | --- | -CFDPAKRM | SCEQALHPY |
| 188424  | LNQILHYLG | ---TPSEDT | LRRVGSRA  | --- | QDY | IRS-LPIKPR | V-PFSTL | -F | P | --- | QAN | PLA | --- | LDLLEQM  | L | --- | -CFDPAKRI | SCEQALHPY |
| 799680  | LNQILHYLG | ---TPSEDT | LRRVGSRA  | --- | QDY | IRS-LPIKPR | V-PFATL | -Y | P | --- | HAN | PLA | --- | LDLLEQM  | L | --- | -CFDPAKRI | SCEQALHPY |
| 178052  | LNQILHYLG | ---TPSEDT | LRRVGSRA  | --- | QDY | IRS-LPIKPR | V-PFSTL | -Y | P | --- | HAN | PLA | --- | LDLLEQM  | L | --- | -CFDPAKRI | SCEQALHPY |
| 129301  | LNQILHYLG | ---TPSEDT | LRRVGSRA  | --- | QDY | IRS-LPIKPR | I-SFATL | -Y | P | --- | RAN | PLA | --- | LDLLEQM  | L | --- | -CFDPAKRI | SCEQALHPY |
| 208817  | LNQILHYLG | ---TPSEDT | LRRVGSRA  | --- | QDY | IRS-LPIKPR | I-SFATL | -Y | P | --- | RAN | PLA | --- | LDLLEQM  | L | --- | -CFDPAKRI | SCEQALHPY |
| 424444  | LNQILHYLG | ---TPSEDT | LRRVGSRA  | --- | QDY | IRS-LPIKPR | V-LFSTL | -F | P | --- | HAN | PLA | --- | LDLLEQM  | L | --- | -CFDPAKRI | SCEQALHPY |
| 830405  | LNQILHYLG | ---TPSEDT | LRRVGSRA  | --- | QDY | IRS-LPIKPR | V-PFSTL | -F | P | --- | QAN | PLA | --- | LDLLEQM  | L | --- | -CFDPAKRM | SCEQALHPY |
| 892596  | LNQILHYLG | ---TPSEDT | LRRVGSRA  | --- | QDY | IRS-LPIKPR | V-PFATL | -Y | P | --- | HGN | PLA | --- | LDLLEQM  | L | --- | -CFDPAKRI | SCEQALHPY |
| 186189  | LNQILHYLG | ---TPSEDT | LRRVGSRA  | --- | QDY | IRS-LPIKPR | V-PFSSL | -F | P | --- | RAN | PMA | --- | LDLLEQM  | L | --- | -NFDPAKRI | TCEQALHPY |
| 164780  | LNQILHYLG | ---TPSEDT | LRRVGSRA  | --- | QDY | IRS-LPIKPR | I-PFTTL | -Y | P | --- | HAN | PLA | --- | LDLLEKM  | L | --- | -TFDPAKRI | TCEQALHPY |
| 167312  | LNQILHYLG | ---TPSEDT | LRRVGSRA  | --- | QDY | IRS-LPIKPR | V-PFATL | -F | P | --- | RAN | PLA | --- | LDLLEQM  | L | --- | -HFDPAKRI | TCEQALHPY |
| 119588  | LNQILHYLG | ---TPSEDT | LRRVGSRA  | --- | QDY | IRS-LPIKPR | V-PFQTL | -F | P | --- | RAN | PLA | --- | LDLLEQM  | L | --- | -HFDPAKRI | TCEQALHPY |
| 423592  | LNQILHYLG | ---TPSEDT | LRRVGSRA  | --- | QDY | IRS-LPIKPR | V-PFQTL | -F | P | --- | HAN | PLA | --- | LDLLEKM  | L | --- | -NFDPAKRI | TCEQALHPY |
| 474667  | LNQILHYLG | ---TPSEDT | LRRVGSRA  | --- | QDY | IRS-LPIKPR | I-SFSTL | -F | P | --- | QAN | PLA | --- | LDLLESM  | L | --- | -CFDPAKRI | SCEQALHPY |
| 459613  | LNQILHYLG | ---TPSEDT | LRRVGSRA  | --- | QDY | IRS-LPIKPR | I-SFSTL | -F | P | --- | QAN | PLA | --- | LDLLESM  | L | --- | -CFDPAKRI | SCEQALHPY |
| 156206  | LNQILHYLG | ---TPSEET | LRRVGSRA  | --- | QDY | IRS-LPKKPR | V-PFSTL | -F | P | --- | QAN | PLA | --- | SDLLEQL  | L | --- | -CFDPAKRM | SCEQALHPY |
| 791811  | LNQILHYLG | ---TPSEET | LRRVGSRA  | --- | QDY | IRS-LPIKPR | V-PFQTL | -F | P | --- | RAN | PLA | --- | LDLLEQL  | L | --- | -QFDPAKRI | TCEQALHPY |
| 146905  | LNQILHYLG | ---TPTEED | LRRVGSRA  | --- | QDY | IRS-LPIKAR | I-PFATL | -Y | P | --- | HAN | PLA | --- | VDLLEQM  | L | --- | -TFDPAKRI | TCEQALHPY |
| 175329  | LNQILHYLG | ---TPLEED | LRRVGSRA  | --- | QDY | IRS-LPIKPR | V-PFQTL | -F | P | --- | RAN | PLA | --- | LDLLEQL  | L | --- | -HFDPAKRI | TCEQALHPY |
| 511921  | LNQILHYLG | ---TPSEDT | LRRVGSRA  | --- | QDY | IRS-LPIKPR | I-PFQSL | -Y | P | --- | HAN | PLA | --- | LDLLEQM  | L | --- | -CFDPAKRI | SCEQALHPY |
| 373951  | LNQILHYLG | ---TPSEDT | LRRVGSRA  | --- | QDY | IRS-LPIKPR | V-PFQTL | -F | P | --- | RAN | PLA | --- | LDLLEQM  | L | --- | -HFDPAKRI | TCEQALHPY |
| 545584  | LNQILHYLG | ---TPSEDT | LRRVGSRA  | --- | QDY | IRS-LPIKPR | I-PFQSL | -Y | P | --- | HAN | PLA | --- | LDLLEQM  | L | --- | -CFDPAKRI | SCEQALHPY |
| 102765  | LNQILHYLG | ---TPSEDT | LRRVGSRA  | --- | QDY | IRS-LPIKPR | I-PFQSL | -Y | P | --- | HAN | PLA | --- | LDLLEQM  | L | --- | -CFDPAKRI | SCEQALHPY |
| 203557  | LNQILHYLG | ---TPSEDT | LRRVGSRA  | --- | QDY | IRS-LPIKPR | V-SFPM  | -Y | P | --- | QAN | PLA | --- | LDLLESM  | L | --- | -CFDPAKRI | SCEQALHPY |
| 302829  | LNQILHYLG | ---TPSEDT | LRRVGSRA  | --- | QDY | IRS-LPIKPR | V-PFSTL | -F | P | --- | HAN | PLA | --- | LDLLESM  | L | --- | -CFDPAKRI | SCEQALHPY |
| 701651  | LNQILHYLG | ---TPSEET | LRRVGSRA  | --- | QDY | IRS-LPIKPR | V-PFQTL | -F | P | --- | RAN | PLA | --- | LDLLEQL  | L | --- | -QFDPAKRI | TCEQALHPY |
| 972433  | LNQILHYLG | ---TPSEDT | LRRVGSRA  | --- | QDY | IRS-LPIKPR | V-PFATL | -Y | P | --- | HAN | PLA | --- | LDLLEQL  | L | --- | -CFDPAKRI | SCEQALHPY |
| 931864  | LNQILHYLG | ---TPSEDT | LRRVGSRA  | --- | QDY | IRS-LPIKPR | V-PFATL | -Y | P | --- | HAN | PLA | --- | LDLLEQL  | L | --- | -CFDPAKRI | SCEQALHPY |
| 813292  | WVLLLRTRY | ---AELAH  | -----EPA  | --- | QDY | IRS-LPIKPR | V-PFATL | -Y | P | --- | HAN | PLA | --- | LDLLEQL  | L | --- | -CFDPAKRI | SCEQALHPY |
| 78187   | LNQILHYLG | ---TPSEDT | LRRVGSRA  | --- | QDY | IRS-LPIKPR | V-PFSTL | -F | P | --- | QAN | PLA | --- | LDLLEQM  | L | --- | -CFDPAKRM | SCEQALHPY |
| 406308  | LNQILHYLG | ---TPNEET | LGRIGSRA  | --- | QDY | VRN-LPFMPK | I-PFDR  | -F | P | --- | NAN | PDA | --- | LDLDRM   | L | --- | -AFDPTSR  | SVEQALHPY |
| 118382  | LNQILHYLG | ---TPSEDT | LRRVGSRA  | --- | QDY | IRS-LPIKPR | V-PFSTL | -F | P | --- | HAN | PLA | --- | LDLLEQM  | L | --- | -CFDPAKRI | SCEQALHPY |
| 100328  | LNQILHYLG | ---TPSEDT | LRRVGSRA  | --- | QDY | IRS-LPIKPR | V-PFSSL | -F | P | --- | RAN | PMA | --- | LDLLEQL  | L | --- | -NFDPAKRI | TCEQALHPY |
| 1411022 | LNQILHLLG | ---TPTEED | LRRVGSRA  | --- | QDY | IRS-LPIKPR | I-PFATL | -Y | P | --- | HAN | PLA | --- | LDLLEQM  | L | --- | -NFDPAKRI | SCEQALHPY |
| 741167  | LNQILHLLG | ---TPTEED | LRRVGSRA  | --- | QDY | IRS-LPIKPR | I-PFATL | -Y | P | --- | HAN | PLA | --- | LDLLEQM  | L | --- | -NFDPAKRI | SCEQALHPY |
| 138511  | LNQILQCLG | ---TPTEDA | LRRIGSRA  | --- | QDY | IRS-LPIRAR | V-PFSTL | -Y | R | --- | NAN | HEA | --- | LDLLEGM  | L | --- | -AFDPAKRL | TCEQALHPY |
| 756718  | LNQILQCLG | ---TPTEDA | LRRIGSRA  | --- | QDY | IRS-LPIRAR | V-PFSTM | -Y | R | --- | NAN | AEA | --- | LDLLEGRM | L | --- | -AFDPAKRL | TCEQALHPY |
| 302653  | LNHILNVLG | ---TPTEED | LRRVGSRA  | --- | QDY | IRS-LPIKPR | Q-PWHQL | -Y | P | --- | KAN | PLA | --- | LDLLEKL  | L | --- | -CFDPAKRI | SCEQALHPY |
| 1311110 | LNQILHYHG | ---TPDDAT | LRRVGSRA  | --- | QDY | IRS-LPFKPG | V-PFNQL | -Y | P | --- | NAN | PVG | --- | LDLLEKLL | L | --- | -AFDPSQRI | TCDQALHPY |
| 722894  | LNQILHYLG | ---TPSEQT | LRRVGSRA  | --- | QDY | IRS-LPHKAG | V-PFQTL | -F | P | --- | NAN | PLA | --- | LDLLEKL  | L | --- | -SFDPSERI | SNCEALHPY |
| 288507  | LNQILHYLG | ---TPNEQA | LRRVGSRA  | --- | QDY | IRS-LPFKPK | I-PFQQL | -Y | P | --- | SAN | PLA | --- | LDLLEKM  | L | --- | -EFDPAKRI | TCDQALHPY |
| 757539  | LNQILHYLG | ---TPSEDT | LRRVGSRA  | --- | QDY | IRS-LPIKPR | I-SFANT | -Y | P | --- | KAN | PLA | --- | LDLLEQM  | L | --- | -CFDPAKRI | SCEQALHPY |
| 184184  | LNQILHYLG | ---TPSEDT | LRRVGSRA  | --- | QDY | IRS-LPIKPR | V-PFSTL | -Y | P | --- | HAN | PLA | --- | LDLLEQM  | L | --- | -CFDPAKRI | SCEQALHPY |
| 917307  | LNQILHYLG | ---TPSEDT | LRRVGSRA  | --- | QDY | IRS-LPIKPR | V-PFATL | -Y | P | --- | HAN | PLA | --- | LDLLEQL  | L | --- | -CFDPAKRI | SCEQALHPY |
| 6355211 | LNQILHYLG | ---TPSEDT | LRRVGSRA  | --- | QDY | IRS-LPIKPR | V-PFSTL | -F | P | --- | HAN | PLA | --- | LDLLEQM  | L | --- | -CFDPAKRI | SCEQALHPY |
| 249241  | LNQILHYLG | ---TPSEDT | LRRVGSRA  | --- | QDY | IRS-LPIKPR | V-PFSTL | -F | P | --- | QAN | PLA | --- | LDLLEQM  | L | --- | -CFDPAKRM | SCEQALHPY |
| 216822  | LNQILHYLG | ---TPSEDT | LRRVGSRA  | --- | QDY | IRS-LPIKPR | V-PFSTL | -F | P | --- | QAN | PLA | --- | LDLLEQM  | L | --- | -CFDPAKRI | SCEQALHPY |
| 805839  | LNQILHYLG | ---TPSEDT | LRRVGSRA  | --- | QDY | IRS-LPIKPR | V-PFATL | -Y | P | --- | HAN | PLA | --- | LDLLEQM  | L | --- | -CFDPAKRI | SCEQALHPY |
| 355172  | LNQILHYLG | ---TPSEDT | LRRVGSRA  | --- | QDY | IRS-LPIKPR | V-PFSTL | -F | P | --- | HAN | PLA | --- | LDLLEQM  | L | --- | -CFDPAKRI | SCEQALHPY |
| 302825  | LNQILHYLG | ---TPSEDT | LRRVGSRA  | --- | QDY | IRS-LPIKPR | V-PFSTL | -F | P | --- | HAN | PLA | --- | LDLLEQM  | L | --- | -CFDPAKRI | SCEQALHPY |
| 239059  | LNQILHYLG | ---TPSEDT | LRRVGSRA  | --- | QDY | IRS-LPIKPR | I-SFSTL | -F | P | --- | QAN | PLA | --- | LDLLESM  | L | --- | -CFDPAKRI | SCEQALHPY |
| 251409  | LNQILHYLG | ---TPSEDT | LRRVGSRA  | --- | QDY | IRS-LPIKPR | V-PFQTL | -F | P | --- | RAN | PLA | --- | LDLLEQL  | L | --- | -HFDPAKRI | TCEQALHPY |
| 251443  | LNQILHYLG | ---TPSEDT | LRRVGSRA  | --- | QDY | IRS-LPIKPR | V-PFQTL | -F | P | --- | RAN | PLA | --- | LDLLEQL  | L | --- | -HFDPAKRI | TCEQALHPY |
| 23484   | LNQILGILG | ---PDEEET | LCRVGSRA  | --- | QVY | IRS-LTRMPK | I-PFNQL | -Y | P | --- | RAS | PLA | --- | LDLLETKL | L | --- | -AFDPAKRI | TVEALHPY  |
| 306334  | LNQILAVLG | ---TPDDAT | LKRVGSRA  | --- | QVY | IRS-LPRMPR | V-PFTTM | -F | P | --- | KAT | PLA | --- | LDLLEKL  | L | --- | -QFDPAQRI | TVEALHPY  |
| 306351  | LNQILAVLG | ---TPDDAT | LKRVGSRA  | --- | QVY | IRS-LPRMPR | V-PFTTM | -F | P | --- | KAT | PLA | --- | LDLLEKL  | L | --- | -QFDPAQRI | TVEALHPY  |
| 148766  | LKQILGTLG | ---TPDDQT | LQRMGSRA  | --- | QYQ | IKS-LPRMQK | V-PFQQL | -Y | P | --- | KAT | PAA | --- | LDLLERL  | L | --- | -DLHTRRI  | TAQALHPY  |
| 84676   | LKQILGTLG | ---TPDDQT | LQRMGSRA  | --- | QYQ | IKS-LPRMQK | V-PFQQL | -Y | P | --- | KAT | PAA | --- | LDLLERL  | L | --- | -DLHTRRI  | TAQALHPY  |
| 74082   | LNQILHYLG | ---TPNEDT | LSRIGSRA  | --- | QDY | VRH-LPRMPK | V-PFASL | -F | R | --- | NAN | PDA | --- | LDLLEDM  | L | --- | -AFDPSERI | SVEALHPY  |
| 97664   | LNQILHYLG | ---TPSEET | LARIGSRA  | --- | QDY | VRN-LPYMQK | I-SFQSL | -F | R | --- | NAN | PDA | --- | LDLLEDM  | L | --- | -AFDPSQRI | SVEALHPY  |
| 97676   | LNQILHYLG | ---TPSEET | LARIGSRA  | --- | QDY | VRN-LPYMQK | I-SFQSL | -F | R | --- | NAN | PDA | --- | LDLLEDM  | L | --- | -AFDPSQRI | SVEALHPY  |
| 297954  | LTQILKLLG | ---TPNEET | LSRIGSRA  | --- | QDY | VRN-LGYMEK | I-PFRQT | -F | P | --- | HAN | PDA | --- | LDLLEDM  | L | --- | -AFDPSQRI | TVEALHPY  |
| 323749  | LNQILHILG | ---TPNEET | LSRIGSRA  | --- | QDY | VRN-LPFMPK | K-SFQSL | -F | P | --- | NAN | PDA | --- | LDLLEDM  | L | --- | -AFDPTSR  | SVEALHPY  |
| 1926181 | LNQILHILG | ---TPNEET | LSRIGSRA  | --- | QDY | VRN-LPFMPK | K-PFSSL | -F | P | --- | QAN | PDA | --- | LDLLEDM  | L | --- | -AFDPSERI | SVEALHPY  |
| 1457364 | LNQILHILG | ---TPNEET | LSRIGSRA  | --- | QDY | VRN-LPFMPK | K-TFSSL | -F | P | --- | QAN | PDA | --- | LDLLEDM  | L | --- | -AFDPSERI | SVEALHPY  |
| 78435   | LNQILHILG | ---TPNEET | LLRIGSRA  | --- | QDY | VRN-LPYMAK | K-TFSSL | -F | P | --- | NAN | PDA | --- | LDLLEDM  | L | --- | -AFDPSQRI | SVEALHPY  |
| 1457361 | LNQILHILG | ---TPNEET | LSRIGSRA  | --- | QDY | VRN-LPFMPK | K-TFSSL | -F | P | --- | QAN | PDA | --- | LDLLEDM  | L | --- | -AFDPSERI | SVEALHPY  |
| 1328540 | LNQILHYHG | ---TPDDAT | LRRVGSRA  | --- | QDY | IRS-LPFKPG | V-PFNQL | -Y | P | --- | NAN | PVG | --- | LDLLEKL  | L | --- | -AFDPSQRI | TCDQALHPY |
| 1364342 | LNQILHYHG | ---TPDDAT | LRRVGSRA  | --- | QDY | IRS-LPFKPG | V-PFNQL | -Y | P | --- | NAN | PVG | --- | LDLLEKL  | L | --- | -AFDPSQRI | TCDQALHPY |
| 1885808 | LNQILHYHG | ---TPNEQA | LRRVGSRA  | --- | QDY | IRS-LPFKPK | I-PFQQL | -Y | P | --- | SAN | PLA | --- | LDLLEKM  | L | --- | -EFDPAKRI | TCDQALHPY |
| 283473  | LNQILHYLG | ---TPLEED | LRRVGSRA  | --- | QDY | IRS-LPIKPR | V-PFQTL | -F | P | --- | RAN | PLA | --- | LDLLEQL  | L | --- | -HFDPAKRI | TCEQALHPY |
| 734869  | LNQILQCLG | ---TPTEDA | LRRIGSRA  | --- | QDY | IRS-LPIRAR | V-PFSTM | -Y | R | --- | NAN | AEA | --- | LDLLEGRM | L | --- | -AFDPAKRL | TCEQALHPY |
| 9394    | ITEIVKVLG | ---TPSIDI | IKRVGNIA  | --- | WLF | FSPKPYQQA  | V-LWSNV | -Y | P | --- | YAS | KVA | --- | VDLIGRL  | L | --- | -CWDSSRL  | NVEALHPY  |
| 167564  | STELKVLG  | ---TPSRI  | ILRVSSAA  | --- | FWF | FSPSPQFPQ  | M-AWSDV | -Y | P | --- | FAS | ENA | --- | HDLMSKL  | L | --- | -CWDSSRY  |           |

|         |            |     |        |            |     |     |            |            |         |     |    |     |          |      |     |           |            |
|---------|------------|-----|--------|------------|-----|-----|------------|------------|---------|-----|----|-----|----------|------|-----|-----------|------------|
| 922124  | LNKLDVLG   | --- | TPAESV | IQRIGSEKA  | --- | QTY | IRS-LPIKVV | Q-PPKLL--V | PAADSN  | --- | A- | --- | IDLTKM   | L-   | --- | YFDPMSRI  | SVEALAHWP  |
| 319286  | LNLLQTLG   | --- | MPDSDT | LTRIGSEKA  | --- | CAY | IRS-VPTYEK | V-PPEKL--Y | PDADTD  | --- | A- | --- | LDLLEK   | L-   | --- | YFDPAEIRI | SVAEALRHP  |
| 332677  | INLLAALG   | --- | SPDDET | LTVKGSEKA  | --- | CAY | MRT-LPHYDP | V-DFSTI--L | PDSDPD  | --- | A- | --- | LDLILAQL | L-   | --- | TDFPSSRL  | TVPQSLTHPY |
| 75030   | VNKLIDLVLG | --- | TPSERV | LQSISSERA  | --- | QAY | IRS-LPIKPP | V-PLVQL--M | PKANPD  | --- | A- | --- | LDLILKFM | L-   | --- | SDFPSDRP  | SVAEALQHPW |
| 740342  | VNKLIDLVLG | --- | TPSERV | LQSISSERA  | --- | QAY | IRS-LPIKPP | V-PLVQL--M | PKANPD  | --- | A- | --- | LDLILKFM | L-   | --- | SDFPSDRP  | SVAEALQHPW |
| 769030  | VNKLIDLVLG | --- | TPSERV | LQSISSERA  | --- | QAY | IRS-LPIKPP | V-PLVQL--M | PKANPD  | --- | A- | --- | LDLILKFM | L-   | --- | SDFPSDRP  | SVAEALQHPW |
| 493654  | LNLIINTL   | --- | TPSDET | IRKIGSDKA  | --- | REY | VRT-LPFFKL | Q-SLPLK--F | PXTDNMG | --- | A- | --- | RDLIHKF  | L-   | --- | RFPDPERI  | TVEALAHFP  |
| 12113   | LNLIINTL   | --- | TPSDDT | IRKIGSDKA  | --- | REY | VRN-LPFFKL | Q-SLPLK--F | PXTDNMG | --- | A- | --- | RDLIHKF  | L-   | --- | RFPDPERI  | TVEALAHFP  |
| 150511  | LNLIINTL   | --- | TPPDDT | IRKIGSDKA  | --- | REY | VRN-LPFFKL | Q-SLPLK--F | PXTDNMG | --- | A- | --- | RDLIHRF  | L-   | --- | RFPDPERI  | TVEALAHFP  |
| 192401  | LNLIINTL   | --- | TPSDET | IRKIGSDKA  | --- | REY | VRT-LPFFKL | Q-SLPLK--F | PXTDNMG | --- | A- | --- | RDLIHKF  | L-   | --- | RFPDPERI  | TVEALAHFP  |
| 543665  | LNLIINTL   | --- | TPSDDT | IRKIGSDKA  | --- | REY | VRN-LPFFKL | Q-SLPLK--F | PXTDNMG | --- | A- | --- | RDLIHKF  | L-   | --- | RFPDPERI  | TVEALAHFP  |
| 91520   | LNKILEVLG  | --- | TPDESI | YAQVSEKA   | --- | --- | ---        | ---        | ---     | --- | A- | --- | LDLILTKM | L-   | --- | SDFPATRI  | SVTEALQHPW |
| 127212  | LNKILEVLG  | --- | TPDESI | YAQVSEKA   | --- | --- | ---        | ---        | ---     | --- | A- | --- | LDLILTKM | L-   | --- | SDFPATRI  | SVTEALQHPW |
| 438879  | LNKLDVLG   | --- | TPRDEV | IKKIGSEKA  | --- | --- | ---        | ---        | ---     | --- | A- | --- | LDLILNKM | L-   | --- | SDFPTDRI  | TVGALHEWP  |
| 174304  | LNKLDVLG   | --- | TPRDEV | IKKIGSEKA  | --- | --- | ---        | ---        | ---     | --- | A- | --- | LDLILNKM | L-   | --- | SDFPTDRI  | TVGALHEWP  |
| 174289  | LNKLDVLG   | --- | TPRDEV | IKKIGSEKA  | --- | --- | ---        | ---        | ---     | --- | A- | --- | LDLILNKM | L-   | --- | SDFPTDRI  | TVGALHEWP  |
| 244084  | LNKILEVLG  | --- | TPBESV | IHRIGSDKA  | --- | --- | ---        | ---        | ---     | --- | A- | --- | LDLILSKM | L-   | --- | SDFPWTRI  | TISEALHPW  |
| 123741  | LNKILEVLG  | --- | SPDDKV | VTRIANERA  | --- | --- | ---        | ---        | ---     | --- | A- | --- | LDLILSRM | L-   | --- | AFDDAQRI  | RVPEALHPW  |
| 127264  | LNKILEVLG  | --- | SPDDKV | VTRIANERA  | --- | --- | ---        | ---        | ---     | --- | A- | --- | LDLILSRM | L-   | --- | AFDDAQRI  | RVPEALHPW  |
| 40528   | LNKLDVLG   | --- | TPDDEV | IKRIASDRA  | --- | --- | ---        | ---        | ---     | --- | A- | --- | LDLILAKM | L-   | --- | TDFDPAARI | TVADALEHPW |
| 39781   | LNKLDVLG   | --- | TPDDEV | IKRIASDRA  | --- | --- | ---        | ---        | ---     | --- | A- | --- | LDLILAKM | L-   | --- | TDFDPAARI | TVADALEHPW |
| 1155690 | VNKLILEL   | --- | TPSEKV | LQAISSERA  | --- | --- | ---        | ---        | ---     | --- | A- | --- | LDLILRKM | L-   | --- | SDFMNDRP  | TVMQALHRW  |
| 247448  | INLLAALG   | --- | SPDDET | LTVKGSEKA  | --- | --- | ---        | ---        | ---     | --- | A- | --- | LDLILAQL | L-   | --- | TDFPSSRL  | TVPQSLTHPY |
| 269975  | IARINNVLG  | --- | SPDAKT | IAKVGSEKA  | --- | --- | ---        | ---        | ---     | --- | A- | --- | VDLISKL  | L-   | --- | CWDPEDRI  | SAAEALQHPW |
| 246067  | IARINNVLG  | --- | SPDAKT | IAKVGSEKA  | --- | --- | ---        | ---        | ---     | --- | A- | --- | VDLISKL  | L-   | --- | CWDPEDRI  | SAAEALQHPW |
| 44396   | IARINNVLG  | --- | SPDAKT | IAKVGSEKA  | --- | --- | ---        | ---        | ---     | --- | A- | --- | VDLISKL  | L-   | --- | CWDPEDRI  | SAAEALQHPW |
| 111248  | LTLIDLVLG  | --- | TPMED  | YGIKSSRA   | --- | --- | ---        | ---        | ---     | --- | A- | --- | LDLILEKL | L-   | --- | AFNPKARI  | TVEALAHPY  |
| 54538   | LTLIDLVLG  | --- | TPMED  | YGIKSSRA   | --- | --- | ---        | ---        | ---     | --- | A- | --- | LDLILEKL | L-   | --- | AFNPKARI  | TVEALAHPY  |
| 1341438 | LSILIDLVLG | --- | TPSLDD | FYAISSSRS  | --- | --- | ---        | ---        | ---     | --- | A- | --- | VDLTKS   | L-   | --- | TDFDKKRI  | DVEALAHPY  |
| 1267921 | LSILIDLVLG | --- | TPSLDD | FYAISSSRS  | --- | --- | ---        | ---        | ---     | --- | A- | --- | VDLTKS   | L-   | --- | TDFDKKRI  | DVEALAHPY  |
| 692594  | FSITITELG  | --- | TPPDDV | IQTICSENT  | --- | --- | ---        | ---        | ---     | --- | A- | --- | IDLLESM  | L-   | --- | TDFSKKRI  | DVEALAHPY  |
| 384872  | LNQLIHYLG  | --- | TPNEBT | LSRIGSPRA  | --- | --- | ---        | ---        | ---     | --- | A- | --- | LDLILDRM | L-   | --- | AFDPSERI  | SVEALERHP  |
| 419622  | LNQLIHYLG  | --- | TPSDET | LARISSERA  | --- | --- | ---        | ---        | ---     | --- | A- | --- | LDLILDRM | L-   | --- | AFDPSERI  | SVEALERHP  |
| 328081  | LNKILNYLG  | --- | TPTEET | LRVGSPPRA  | --- | --- | ---        | ---        | ---     | --- | A- | --- | LDLILQRL | L-   | --- | AFDPAARI  | NCEVALHPW  |
| 61803   | LKLIQTQIG  | --- | TPGNDD | I-QPVSTK   | --- | --- | ---        | ---        | ---     | --- | A- | --- | LDLILNRM | L-   | --- | VFMGKARI  | GNDVALHPW  |
| 40664   | LKLIQTQIG  | --- | TPGNDD | I-QPVSTK   | --- | --- | ---        | ---        | ---     | --- | A- | --- | LDLILNRM | L-   | --- | VFMGKARI  | GNDVALHPW  |
| 105104  | IRIITDKIG  | --- | TPSDED | LISFVKSTK  | --- | --- | ---        | ---        | ---     | --- | A- | --- | LDLILQRM | L-   | --- | TFMPAKRI  | TVQDALHPW  |
| 147180  | LRLICQVLG  | --- | SPSNEE | M-APMSSEGS | --- | --- | ---        | ---        | ---     | --- | A- | --- | LDLILSKM | L-   | --- | TFSFKARI  | TALAEALHPW |
| 148245  | LQVIBILG   | --- | TPSASE | I-DFINSPS  | --- | --- | ---        | ---        | ---     | --- | A- | --- | LDLILQRM | L-   | --- | VDFPGRRI  | TIDALEHPW  |
| 146852  | LTLISDLG   | --- | KPQDBD | L-AFVTSK   | --- | --- | ---        | ---        | ---     | --- | A- | --- | VNLLERM  | L-   | --- | VDFPSARI  | TVEALAHPY  |
| 33818   | LTLISDLG   | --- | KPQDBD | L-AFVTSK   | --- | --- | ---        | ---        | ---     | --- | A- | --- | VNLLERM  | L-   | --- | VDFPSARI  | TVEALAHPY  |
| 116469  | LTLISDLG   | --- | KPQDBD | L-AFVTSK   | --- | --- | ---        | ---        | ---     | --- | A- | --- | VNLLERM  | L-   | --- | VDFPSARI  | TVEALAHPY  |
| 503885  | LQIMSVLG   | --- | TPSDEV | LDRIKPTP   | --- | --- | ---        | ---        | ---     | --- | A- | --- | IDLLEKL  | L-   | --- | VWCPSDRL  | TAEQVLAHPW |
| 503914  | LQIMSVLG   | --- | TPSDEV | LDRIKPTP   | --- | --- | ---        | ---        | ---     | --- | A- | --- | IDLLEKL  | L-   | --- | VWCPSDRL  | TAEQVLAHPW |
| 6817382 | ---        | --- | DVNV   | IRKIGSPKA  | --- | --- | ---        | ---        | ---     | --- | A- | --- | LDLILAKM | L-   | --- | SDFPSARI  | TVDEALHWS  |
| 145980  | LNQLIHYLG  | --- | TPS-ES | TLRS       | I-  | --- | ---        | ---        | ---     | --- | A- | --- | LDLILDRM | L-   | --- | AFDPSARI  | GVEALERHP  |
| 328170  | LNQLIHYLG  | --- | TPN-ED | TLRS       | I-  | --- | ---        | ---        | ---     | --- | A- | --- | LDLILDRM | L-   | --- | AFDPSARI  | SVEALERHP  |
| 691008  | LNQLIHYLG  | --- | TPN-EE | TLRS       | I-  | --- | ---        | ---        | ---     | --- | A- | --- | LDLILDRM | L-   | --- | AFDPSARI  | SVEALERHP  |
| 73316   | LNQLIHYLG  | --- | TPD-ES | TLQL       | I-  | --- | ---        | ---        | ---     | --- | A- | --- | LDLILAKM | L-   | --- | AFVPAKRI  | TTEALAHPY  |
| 1219281 | LNQLIHYLG  | --- | TPN-EE | TLNR       | I-  | --- | ---        | ---        | ---     | --- | A- | --- | LDLILNEM | L-   | --- | AFDPTSRV  | SVTEALERHP |
| 422525  | LNQLIHILG  | --- | TPD-DE | TLRR       | I-  | --- | ---        | ---        | ---     | --- | A- | --- | LDLILNEM | L-   | --- | KFPDPAARI | TVEALSHPY  |
| 212435  | LNQLIGILG  | --- | TPD-EE | TLRR       | I-  | --- | ---        | ---        | ---     | --- | A- | --- | LDLILNEM | L-   | --- | KFPDPAARI | TVEALSHPY  |
| 187307  | LNQLIHYLG  | --- | TPS-ED | TLRR       | I-  | --- | ---        | ---        | ---     | --- | A- | --- | LDLILNEM | L-   | --- | KFPDPAARI | TVEALSHPY  |
| 146240  | LNQLIHYLG  | --- | TPS-ED | TLRR       | I-  | --- | ---        | ---        | ---     | --- | A- | --- | LDLILNEM | L-   | --- | KFPDPAARI | TVEALSHPY  |
| 156221  | LNQLIHYLG  | --- | TPS-EE | TLRR       | I-  | --- | ---        | ---        | ---     | --- | A- | --- | LDLILNEM | L-   | --- | KFPDPAARI | TVEALSHPY  |
| 126510  | LNQLIHYLG  | --- | TPS-EE | TLRR       | I-  | --- | ---        | ---        | ---     | --- | A- | --- | LDLILNEM | L-   | --- | KFPDPAARI | TVEALSHPY  |
| 821431  | LNQLIHYLG  | --- | TPS-ED | TLRR       | I-  | --- | ---        | ---        | ---     | --- | A- | --- | LDLILNEM | L-   | --- | KFPDPAARI | TVEALSHPY  |
| 127874  | LNHLINVLG  | --- | TPD-ED | TLRR       | I-  | --- | ---        | ---        | ---     | --- | A- | --- | LDLILSKL | L-   | --- | CDFDAKAM  | SCEALNHPW  |
| 157692  | LNQLIHYLG  | --- | TPS-EA | TLRR       | I-  | --- | ---        | ---        | ---     | --- | A- | --- | LDLILSKL | L-   | --- | CDFDAKAM  | SCEALNHPW  |
| 47352   | IRIITDKIG  | --- | TPSDED | LISF       | I-  | --- | ---        | ---        | ---     | --- | A- | --- | LDLILQRM | L-   | --- | IPRISCA   | TVQSAGTRPG |
| 136580  | LTLIDLVLG  | --- | TPMED  | YGI        | I-  | --- | ---        | ---        | ---     | --- | A- | --- | LDLILDKL | L-   | --- | TFMPAKRI  | TVQDALHPW  |
| 142298  | LTLIDLVLG  | --- | TPMED  | YGI        | I-  | --- | ---        | ---        | ---     | --- | A- | --- | LDLILDKL | L-   | --- | TFMPAKRI  | TVQDALHPW  |
| 71188   | LTLIDLVLG  | --- | TPMED  | YGI        | I-  | --- | ---        | ---        | ---     | --- | A- | --- | LDLILDKL | L-   | --- | TFMPAKRI  | TVQDALHPW  |
| 2049832 | LTLIDLVLG  | --- | TPMED  | YGI        | I-  | --- | ---        | ---        | ---     | --- | A- | --- | LDLILDKL | L-   | --- | TFMPAKRI  | TVQDALHPW  |
| 2023270 | LTLIDLVLG  | --- | TPMED  | YGI        | I-  | --- | ---        | ---        | ---     | --- | A- | --- | LDLILDKL | L-   | --- | TFMPAKRI  | TVQDALHPW  |
| 62157   | LTLIDLVLG  | --- | TPMED  | YGI        | I-  | --- | ---        | ---        | ---     | --- | A- | --- | LDLILDKL | L-   | --- | TFMPAKRI  | TVQDALHPW  |
| 117327  | LTLIDLVLG  | --- | TPMED  | YGI        | I-  | --- | ---        | ---        | ---     | --- | A- | --- | LDLILDKL | L-   | --- | TFMPAKRI  | TVQDALHPW  |
| 1420954 | LTLIDLVLG  | --- | TPMED  | YGI        | I-  | --- | ---        | ---        | ---     | --- | A- | --- | LDLILDKL | L-   | --- | TFMPAKRI  | TVQDALHPW  |
| 146600  | LTLIDLVLG  | --- | TPMED  | YGI        | I-  | --- | ---        | ---        | ---     | --- | A- | --- | LDLILDKL | L-   | --- | TFMPAKRI  | TVQDALHPW  |
| 427542  | LTLIDLVLG  | --- | TPMED  | YGI        | I-  | --- | ---        | ---        | ---     | --- | A- | --- | LDLILDKL | L-   | --- | TFMPAKRI  | TVQDALHPW  |
| 524866  | LTLIDLVLG  | --- | TPMED  | YGI        | I-  | --- | ---        | ---        | ---     | --- | A- | --- | LDLILDKL | L-   | --- | TFMPAKRI  | TVQDALHPW  |
| 304061  | LTLIDLVLG  | --- | TPMED  | YGI        | I-  | --- | ---        | ---        | ---     | --- | A- | --- | LDLILDKL | L-   | --- | TFMPAKRI  | TVQDALHPW  |
| 262011  | LTLIDLVLG  | --- | TPMED  | YGI        | I-  | --- | ---        | ---        | ---     | --- | A- | --- | LDLILDKL | L-   | --- | TFMPAKRI  | TVQDALHPW  |
| 385460  | LTLIDLVLG  | --- | TPMED  | YGI        | I-  | --- | ---        | ---        | ---     | --- | A- | --- | LDLILDKL | L-   | --- | TFMPAKRI  | TVQDALHPW  |
| 322662  | LTLIDLVLG  | --- | TPMED  | YGI        | I-  | --- | ---        | ---        | ---     | --- | A- | --- | LDLILDKL | L-   | --- | TFMPAKRI  | TVQDALHPW  |
| 1531698 | LTLIDLVLG  | --- | TPMED  | YGI        | I-  | --- | ---        | ---        | ---     | --- | A- | --- | LDLILDKL | L-   | --- | TFMPAKRI  | TVQDALHPW  |
| 1273298 | LTLIDLVLG  | --- | TPMED  | YGI        | I-  | --- | ---        | ---        | ---     | --- | A- | --- | LDLILDKL | L-   | --- | TFMPAKRI  | TVQDALHPW  |
| 211888  | LTLIDLVLG  | --- | TPMED  | YGI        | I-  | --- | ---        | ---        | ---     | --- | A- | --- | LDLILDKL | L-   | --- | TFMPAKRI  | TVQDALHPW  |
| 1140823 | LTLIDLVLG  | --- | TPMED  | YGI        | I-  | --- | ---        | ---        | ---     | --- | A- | --- | LDLILDKL | L-   | --- | TFMPAKRI  | TVQDALHPW  |
| 84032   | LTLIDLVLG  | --- | TPMED  | YGI        | I-  | --- | ---        | ---        | ---     | --- | A- | --- | LDLILDKL | L-   | --- | TFMPAKRI  | TVQDALHPW  |
| 337569  | LTLIDLVLG  | --- | TPMED  | YGI        | I-  | --- | ---        | ---        | ---     | --- | A- | --- | LDLILDKL | L-   | --- | TFMPAKRI  | TVQDALHPW  |
| 675946  | LTLIDLVLG  | --- | TPMED  | YGI        | I-  | --- | ---        | ---        | ---     | --- | A- | --- | LDLILDKL | L-   | --- | TFMPAKRI  | TVQDALHPW  |
| 188798  | LTLIDLVLG  | --- | TPMED  | YGI        | I-  | --- | ---        | ---        | ---     | --- | A- | --- | LDLILDKL | L-   | --- | TFMPAKRI  | TVQDALHPW  |
| 364357  | LTLIDLVLG  | --- | TPMED  | YGI        | I-  | --- | ---        | ---        | ---     | --- | A- | --- | LDLILDKL | L-   | --- | TFMPAKRI  | TVQDALHPW  |
| 417259  | LTLIDLVLG  | --- | TPMED  | YGI        | I-  | --- | ---        | ---        | ---     | --- | A- | --- | LDLILDKL | L-   | --- | TFMPAKRI  | TVQDALHPW  |
| 391850  | LTLIDLVLG  | --- | TPMED  | YGI        | I-  | --- | ---        | ---        | ---     | --- | A- | --- | LDLILDKL | L-   | --- | TFMPAKRI  | TVQDALHPW  |
| 420539  | LTLIDLVLG  | --- | TPMED  | YGI        | I-  | --- | ---        | ---        | ---     | --- | A- | --- | LDLILDKL | L-   | --- | TFMPAKRI  | TVQDALHPW  |
| 1649896 | LTLIDLVLG  | --- | TPMED  | YGI        | I-  | --- | ---        | ---        | ---     | --- | A- | --- | LDLILDKL | L-   | --- | TFMPAKRI  | TVQDALHPW  |
| 280694  | LTLILEMLG  | --- | TPMED  | YGI        | I-  | --- | ---        | ---        | ---     | --- | A- | --- | LDLILDKL | L-   | --- | TFMPAKRI  | TVQDALHPW  |
| 381396  | LTLIDLVLG  | --- | TPMED  | YGI        | I-  | --- | ---        | ---        | ---     | --- | A- | --- | LDLILDKL | L-   | --- | TFMPAKRI  | TVQDALHPW  |
| 685453  | LTLIDLVLG  | --- | TPMED  | YGI        | I-  | --- | ---        | ---        | ---     | --- | A- | --- | LDLILDKL | L-   | --- | TFMPAKRI  | TVQDALHPW  |
| 284413  | LTLIDLVLG  | --- | TPMED  | YGI        | I-  | --- | ---        | ---        | ---     | --- | A- | --- | LDLILDKL | L-   | --- | TFMPAKRI  | TVQDALHPW  |
| 384436  | LTLIDLVLG  | --- | TPMED  | YGI        | I-  | --- | ---        | ---        | ---     | --- | A- | --- | LDLILDKL | L-   | --- | TFMPAKRI  | TVQDALHPW  |
| 907966  | LTLIDLVLG  | --- | TPMED  | YGI        | I-  | --- | ---        | ---        | ---     | --- | A- | --- | LDLILDKL | L-   | --- | TFMPAKRI  | TVQDALHPW  |
| 205730  | LSLIDMLG   | --- | TPSLED | FNAI       | I-  | --- | ---        | ---        | ---     | --- | A- | --- | VDLLEKM  | L-   | --- | TDFPTKRI  | TVEALSHPY  |
| 86646   | LSLIDLVLG  | --- | TPSMD  | FYAI       | I-  | --- | ---        | ---        | ---     | --- | A- | --- | VDLLEKM  | L-   | --- | TDFPTKRI  | TVEALSHPY  |
| 9721    | LTLIDLVLG  | --- | TPSID  | FTAI       | I-  | --- | ---        | ---        | ---     | --- | A- | --- | VDLLEKM  | L-</ |     |           |            |

|         |           |           |      |     |          |            |         |     |   |     |      |     |     |         |   |     |          |            |
|---------|-----------|-----------|------|-----|----------|------------|---------|-----|---|-----|------|-----|-----|---------|---|-----|----------|------------|
| 1340042 | LTLILDVLG | ---TPTLDE | FYAI | --- | NSRRSRDY | L-RALPFRKK | R-PFSQL | --- | Y | --- | PNAS | ALA | --- | VDFLTKT | L | --- | TDFPKKRL | TVEALQHPY  |
| 225932  | LTLILDVLG | ---TPTLDE | FYAI | --- | NSRRSRDY | L-RALPFRKK | R-PFNVL | --- | Y | --- | PNAS | ALA | --- | IDPLNKT | L | --- | TDFPKKRL | TVEALQHPY  |
| 346924  | LSRLDVLG  | ---TPTLDE | FYAI | --- | TSRRSKYE | V-RNMPFRKK | K-DFATL | --- | Y | --- | PNAS | PAA | --- | IDPLTKT | L | --- | TDFPKKRF | TVEACLSHPY |
| 760343  | LTLILDVLG | ---TPTLDE | FYAI | --- | NSRRSRDY | L-RALPFRKK | R-PFSQL | --- | Y | --- | PNAS | ALA | --- | VDFLTKT | L | --- | TDFPKKRL | TVEALQHPY  |
| 151487  | LRLLDVLG  | ---TPMEE  | FYDV | --- | TSRRSRDY | L-RNLVPRTK | K-SFESL | --- | Y | --- | PKAS | PAA | --- | IDPLRKT | L | --- | TFSKKRM  | TVEACLQHPY |
| 108600  | LTLILDIG  | ---TPSLDD | FYAI | --- | SSHRSRDY | L-RALPFRKK | K-PFSQL | --- | Y | --- | PNAS | ALA | --- | IDLLERC | L | --- | TFMKKRI  | TCEALRHPY  |
| 724148  | LTLILDIG  | ---TPSLDD | FYAI | --- | SSHRSRDY | L-RALPFRKK | K-PFSQL | --- | Y | --- | PNAS | ALA | --- | IDLLERC | L | --- | TFMKKRI  | TCEALRHPY  |
| 276168  | LSLLEILG  | ---TPSLDD | FYAI | --- | SSRSRDY  | I-RALPFRKK | R-NFPQM | --- | F | --- | PNAN | PLA | --- | VDMERK  | L | --- | TFSPKRI  | TAEDALRHPY |
| 194959  | LTLILDVLG | ---TPSLDE | FYAI | --- | TSRRSRDY | I-RALPFRKK | R-PFTSL | --- | F | --- | PQAS | KEA | --- | IDPLTKT | L | --- | TDFPKKRM | TVEALRHPY  |
| 345309  | LDLILDIG  | ---TPSID  | FYAI | --- | TSRRSRDY | I-RALPFRKK | R-PFTSL | --- | F | --- | PQAS | KEA | --- | IDPLTKT | L | --- | TDFPKKRI | TVEALRHPY  |
| 718596  | LDLILDIG  | ---TPSLDE | FYAI | --- | TSRRSRDY | I-RALPFRKK | R-PFTSL | --- | F | --- | PQAS | KEA | --- | IDPLTKT | L | --- | TDFPKKRM | TVEALRHPY  |
| 439783  | LDLILDIG  | ---TPSLDE | FYAI | --- | TSRRSRDY | I-RALPFRKK | R-PFTSL | --- | F | --- | PQAS | KEA | --- | IDPLTKT | L | --- | TDFPKKRM | TVEALRHPY  |
| 73775   | LDLILDIG  | ---TPSLDE | FYAI | --- | TSRRSRDY | I-RALPFRKK | R-PFTSL | --- | F | --- | PHAS | AEA | --- | IDPLSKT | L | --- | TDFPKKRM | TDEALRHPY  |
| 681486  | LDLILDIG  | ---TPSLDE | FYAI | --- | TSRRSRDY | I-RALPFRKK | R-PFTSL | --- | F | --- | PHAS | KEA | --- | IDPLAKT | L | --- | TDFPKKRM | TVEALRHPY  |
| 671673  | LDLILDIG  | ---TPSLDE | FYAI | --- | TSRRSRDY | I-RALPFRKK | R-PFTSL | --- | F | --- | PHAS | KEA | --- | IDPLAKT | L | --- | TDFPKKRM | TVEALRHPY  |
| 829815  | LDLILDIG  | ---TPSLDE | FYAI | --- | TSRRSRDY | I-RALPFRKK | R-PFTSL | --- | F | --- | PQAS | QEA | --- | IDPLSRT | L | --- | TDFPKKRM | NVDALCHPY  |
| 413627  | LDLILDIG  | ---TPSLDE | FYAI | --- | TSRRSRDY | I-RALPFRKK | R-PFTSL | --- | F | --- | PQAS | ADA | --- | IDPLNQT | L | --- | TDFPKKRM | TVDALRHPY  |
| 109090  | LDLILDIG  | ---TPSLDE | FYAI | --- | TSRRSRDY | I-RALPFRKK | R-PFTSL | --- | F | --- | PKAS | EDA | --- | IDPLQRT | L | --- | TDFPKKRI | TVEALRHPY  |
| 43366   | LELILDIG  | ---TPSLDE | FYAI | --- | TSRRSRDY | I-RALPFRKK | R-PFAAL | --- | F | --- | PKAS | PEA | --- | IDPLSKT | L | --- | TDFPKKRI | TADQALRHPY |
| 706326  | LDLILDIG  | ---TPSLDE | FYAI | --- | TSRRSRDY | I-RALPFRKK | R-SFGAL | --- | F | --- | PKAS | EDA | --- | IDPLAKT | L | --- | TDFPKKRL | TVDQALRHPY |
| 1157202 | LDLILDIG  | ---TPSLDE | FYAI | --- | TSRRSRDY | I-RALPFRKK | K-SFSSV | --- | F | --- | PKAT | PEA | --- | IDPLSKT | L | --- | TDFPKKRL | TVDQALRHPY |
| 743174  | LDLILDIG  | ---TPSLDE | FYAI | --- | TSRRSRDY | I-RALPFRKK | K-SFSAL | --- | F | --- | PKAS | PEA | --- | IDPLRKT | L | --- | TDFPKKRL | TVDQALRHPY |
| 5331    | LDLILDIG  | ---TPSLDE | FYAI | --- | TSRRSRDY | I-RALPFRKK | K-SFSTI | --- | F | --- | PKAT | PEA | --- | IDPLTKT | L | --- | TDFPKKRL | TVDQALRHPY |
| 713967  | LDLILDIG  | ---TPSLDE | FYAI | --- | TSRRSRDY | I-RALPFRKK | K-SFSAL | --- | F | --- | PKAS | PEA | --- | IDPLRKT | L | --- | TDFPKKRL | TVDQALRHPY |
| 151043  | LDLILDIG  | ---TPSLDE | FYAI | --- | TSRRSRDY | I-RALPFRKK | R-PFTAL | --- | F | --- | PKAS | PEA | --- | IDPLQKT | L | --- | TDFPKKRL | TVDQALRHPY |
| 481570  | LDLILDIG  | ---TPSLDE | FYAI | --- | TSRRSRDY | I-RALPFRKK | R-PFTAL | --- | F | --- | PKAS | PEA | --- | IDPLQKT | L | --- | TDFPKKRL | TVDQALRHPY |
| 104738  | LDLILDIG  | ---TPSLDE | FYAI | --- | TSRRSRDY | I-RALPFRKK | R-PFTAL | --- | F | --- | PKAS | PDA | --- | IDPLQKT | L | --- | TDFPKKRL | TVDQALRHPY |
| 689474  | LDLILDIG  | ---TPSLDE | FYAI | --- | TSRRSRDY | I-RALPFRKK | K-QFTQL | --- | F | --- | PKAS | ADA | --- | IDPLHKT | L | --- | TDFPKKRL | TVEALRHPY  |
| 179470  | LDLILDIG  | ---TPSLDE | FYAI | --- | TSRRSRDY | I-RALPFRKK | K-SFTQL | --- | F | --- | PKAS | ADS | --- | IDPLQRT | L | --- | TDFPKKRL | TVEALRHPY  |
| 31001   | LDLILDIG  | ---TPSLDE | FYAI | --- | TSRRSRDY | I-RALPFRKK | K-NFSSL | --- | F | --- | PKAS | PDA | --- | IDPLQKT | L | --- | TDFPKKRL | TVEALRHPY  |
| 155293  | LDLILDIG  | ---TPSLDE | FYAI | --- | TSRRSRDY | I-RALPFRKK | K-PLISL | --- | I | --- | PKAS | PST | --- | IDPLSNT | L | --- | TDFPKKRM | TIEALRHPY  |
| 83606   | LDLILDIG  | ---TPSLDE | FYAI | --- | TSRRSRDY | I-RALPFRKK | K-PLISL | --- | I | --- | PKAS | PST | --- | IDPLSNT | L | --- | TDFPKKRM | TIEALRHPY  |
| 79026   | LSLILDIG  | ---TPSID  | FYAI | --- | SSARSREY | L-RALPFRKK | V-NFHHV | --- | F | --- | SKAN | PLA | --- | VDMERK  | L | --- | TFSPKRI  | TVEALRHPY  |
| 79053   | LSLILDIG  | ---TPSID  | FYAI | --- | SSARSREY | L-RALPFRKK | V-NFHHV | --- | F | --- | SKAN | PLA | --- | VDMERK  | L | --- | TFSPKRI  | TVEALRHPY  |
| 188294  | LSLILDIG  | ---TPSID  | FYAI | --- | SSARSREY | L-RALPFRKK | K-NFAQL | --- | F | --- | PKAN | PLA | --- | IDLLEK  | L | --- | TFSPKRI  | EVSEALRHPY |
| 422326  | LSLILDIG  | ---TPSID  | FYAI | --- | SSARSREY | L-RALPFRKK | K-NFATL | --- | F | --- | PKAN | PLA | --- | IDLLEK  | L | --- | TFSPKRI  | EVSEALRHPY |
| 59295   | LSLILDIG  | ---TPSLDD | FYAI | --- | TSQRSREY | I-RALPFRKK | R-QFSSL | --- | F | --- | PGAN | PLA | --- | IDLMEK  | L | --- | TFSPKRI  | DVEALRHPY  |
| 91727   | LSLILDIG  | ---TPSLDD | FYAI | --- | TSQRSREY | I-RALPFRKK | K-PFSQL | --- | F | --- | PGAN | PLA | --- | IDLMEK  | L | --- | TFSPKRI  | DVEALRHPY  |
| 92869   | LSLILDIG  | ---TPSLDD | FYAI | --- | TSQRSREY | I-RALPFRKK | K-PLSOL | --- | F | --- | PGAN | PLA | --- | IDLMEK  | L | --- | TFSPKRI  | DVEALRHPY  |
| 513929  | LSLILDIG  | ---TPSLDD | FYAI | --- | TSQRSREY | I-RALPFRKK | K-PFSOL | --- | F | --- | PGAN | QEA | --- | IDLMEK  | L | --- | TFSPKRI  | EVSEALRHPY |
| 166192  | LSLILDIG  | ---TPSLDD | FYAI | --- | TSQRSREY | I-RALPFRKK | K-PLSOL | --- | F | --- | PGAN | PLA | --- | IDLMEK  | L | --- | TFSPKRI  | EVSEALRHPY |
| 210022  | LSLILDIG  | ---TPSLDD | FYAI | --- | TSQRSREY | I-RALPFRKK | K-PFSVL | --- | F | --- | PGAN | PLA | --- | VELLERC | L | --- | TFSPKRI  | QVEALRHPY  |
| 847083  | LSLILDIG  | ---TPSID  | FYAI | --- | TSRSREY  | I-RALPFRKK | R-PFAQL | --- | F | --- | PNAS | PLA | --- | IDPLEHC | L | --- | TFSPKRI  | EVSEALRHPY |
| 819022  | LSLILDIG  | ---TPSID  | FYAI | --- | TSQRSREY | I-RALPFRKK | K-SFHQL | --- | F | --- | PKAN | PLA | --- | IDLMEK  | L | --- | TFSPKRI  | EVSEALRHPY |
| 50473   | LSLILDIG  | ---TPSID  | FYAI | --- | TSQRSREY | I-RALPFRKK | K-SFHQL | --- | F | --- | PKAN | PLA | --- | IDLMEK  | L | --- | TFSPKRI  | EVSEALRHPY |
| 850567  | LSLILDIG  | ---TPSID  | FYAI | --- | SSPRSREY | I-RALPFRGG | K-DPKIM | --- | F | --- | QGAN | ELA | --- | IDPLEKC | L | --- | TFSPKRI  | TVEALRHPY  |
| 183076  | LSLILDIG  | ---TPSID  | FYAI | --- | SSPRSREY | I-RALPFRGG | K-ELSGM | --- | F | --- | SGAN | ELA | --- | IDPLEKC | L | --- | TFSPKRI  | TVEALRHPY  |
| 1114014 | LSLILDIG  | ---TPSID  | FYAI | --- | SSRSREY  | I-RALPFRKN | R-PFAQL | --- | F | --- | PKAN | PLA | --- | IDPLEKC | L | --- | TFSPKRI  | TVEALRHPY  |
| 47661   | LSLILDIG  | ---TPSLDD | FYAI | --- | TSPRSREY | I-RALPFRKK | K-PFSTL | --- | F | --- | PNAN | PLA | --- | IDPLEQC | L | --- | TFSPKRI  | QVEALRHPY  |
| 6536531 | LSLILETG  | ---TPSID  | FYAI | --- | NSQRSREY | I-RALPFRKK | K-NFSQM | --- | F | --- | PNAN | PLA | --- | IDLMEK  | L | --- | AFSPKRL  | DVAEALRHPY |
| 277624  | LSLILETG  | ---TPSID  | FYAI | --- | NSQRSREY | I-RALPFRKK | R-NFTQM | --- | F | --- | PNAN | PLA | --- | IDLMEK  | L | --- | AFSPKRL  | DVAEALRHPY |
| 77457   | LSLILETG  | ---TPSID  | FYAI | --- | NSQRSREY | I-RALPFRKK | K-NFAQM | --- | F | --- | PKAN | PLA | --- | IDLMEK  | L | --- | AFSPKRL  | DVEALRHPY  |
| 89431   | LSLILETG  | ---TPSID  | FYAI | --- | NSQRSREY | I-RALPFRKK | K-NFAQM | --- | F | --- | PKAN | PLA | --- | IDLMEK  | L | --- | AFSPKRL  | DVEALRHPY  |
| 484632  | LSLILETG  | ---TPSID  | FYAI | --- | NSQRSREY | I-RALPFRKK | K-SFAQM | --- | F | --- | PNAN | PLA | --- | IDLMEK  | L | --- | TFSPKRL  | QVEALRHPY  |
| 161998  | LSLILDIG  | ---TPSID  | FYAI | --- | SSPRSREY | I-RALPFRKK | R-SLMTL | --- | F | --- | PNAN | PLA | --- | VDMERK  | L | --- | TFSPKRI  | QVDDALRHPY |
| 131877  | LSLILDIG  | ---TPSID  | FYAI | --- | TSQRSREY | L-RALPFRKK | K-SFASL | --- | F | --- | PNAN | PLA | --- | VDMERK  | L | --- | TFSPKRI  | DVEALRHPY  |
| 117759  | LSLILDIG  | ---TPSLDD | FYAI | --- | NSQRSREY | I-RALPFRKK | K-SFASL | --- | F | --- | PNAN | PLA | --- | VDMERK  | L | --- | TFSPKRI  | EVSEALRHPY |
| 489827  | LSLILDIG  | ---TPSLDD | FYAI | --- | TSLSREY  | I-RALPFRKK | K-PFQOL | --- | F | --- | PNAN | PLA | --- | VDMERK  | L | --- | TFSPKRI  | TVEALRHPY  |
| 115935  | LSLILDIG  | ---TPSLDD | FYAI | --- | TSLSREY  | I-RALPFRKK | K-PFTQL | --- | F | --- | PNAN | PLA | --- | VDMERK  | L | --- | TFSPKRI  | TVEALRHPY  |
| 482781  | LSLILDIG  | ---TPSLDD | FYAI | --- | TSLSREY  | I-RALPFRKK | K-PFSOL | --- | F | --- | PNAN | PLA | --- | VDMERK  | L | --- | TFSPKRI  | TVEALRHPY  |
| 545919  | LSLILDIG  | ---TPSLDD | FYAI | --- | TSLSREY  | I-RALPFRKK | K-PFSOL | --- | F | --- | PNAN | PLA | --- | VDMERK  | L | --- | TFSPKRI  | TVEALRHPY  |
| 6536562 | LSLILETG  | ---TPSID  | FYAI | --- | NSQRSREY | I-RALPFRKK | K-NFSQM | --- | F | --- | PNAN | PLA | --- | IDLMEK  | L | --- | AFSPKRL  | DVAEALRHPY |
| 309997  | LSLILDVVG | ---TPNMD  | FDEI | --- | TSARSKDY | L-RQLPFRMR | R-DFAEI | --- | C | --- | PKAT | PRA | --- | VDFIKRC | L | --- | TFSPTKRM | TVOALRHPY  |
| 316873  | LSLILDVVG | ---TPNMD  | FDEI | --- | TSARSKDY | L-RQLPFRMR | R-DFAEI | --- | C | --- | PKAT | PRA | --- | VDFIKRC | L | --- | TFSPTKRM | TVOALRHPY  |
| 492267  | LSLILDIG  | ---TPSID  | FYAI | --- | TSQRSREY | L-RALPFRKK | K-PFSOL | --- | F | --- | PKAN | PLA | --- | IDLMEK  | L | --- | TFSPKRI  | DVEALRHPY  |
| 103465  | LLLIFELG  | ---TPSSDD | MLSV | --- | RSKRAREY | I-RTLQPPFR | V-NLRAK | --- | F | --- | SPAN | PLG | --- | IDLLEK  | L | --- | IDFPTKRI | KVTEALRHPY |
| 167039  | LMILFQVLG | ---SPIGDD | YKSI | --- | RSRRAREY | I-RSLTFYKK | Q-PFSOL | --- | F | --- | PKAN | PKA | --- | IDLDDKM | L | --- | TDFDPKRI | TVEALRHPY  |
| 8637    | LALIFEVG  | ---TPTAE  | MKCI | --- | KLKKARDF | V-ASQRVRRK | I-PMKFI | --- | F | --- | RNAN | PLA | --- | IDPIKT  | V | --- | CFDPEKRM | TIEQTLRHPY |
| 65963   | LLLIFEILG | ---TPGAD  | FQSI | --- | KSKRAREY | I-RSQRFPPK | I-PLRKI | --- | F | --- | PNAN | PSA | --- | VDMDRM  | L | --- | KDFPTQL  | TVEALRHPY  |
| 246409  | LSLILDIG  | ---TPSLDD | FYAI | --- | TSPRSREY | I-RALPFRKK | R-PFSAL | --- | F | --- | PNAN | PLA | --- | IDLMEK  | L | --- | TFSPKRI  | EVSEALRHPY |
| 246352  | LSLILDIG  | ---TPSLDD | FYAI | --- | TSPRSREY | I-RALPFRKK | R-PFSAL | --- | F | --- | PNAN | PLA | --- | IDLMEK  | L | --- | TFSPKRI  | EVSEALRHPY |
| 668220  | LTLILDVLG | ---TPTLDE | FYAI | --- | TTRRSRDY | I-RALPFRKK | K-PFAQL | --- | F | --- | PNAS | PLA | --- | VDFLTRS | L | --- | TDFPKKRI | TVEALRHPY  |
| 619500  | LTLILDVLG | ---TPTLDE | FYAI | --- | TTRRSRDY | I-RALPFRKK | K-PFAQL | --- | F | --- | PNAN | PLA | --- | VDFLAKT | L | --- | TDFPKKRI | TVEALRHPY  |
| 64492   | LTLILDVLG | ---TPTLDE | FYAI | --- | TTRRSRDY | I-RALPFRKK | K-PFAQL | --- | F | --- | PNAN | PLA | --- | IDPLTRT | L | --- | TDFPKKRI | TVEALRHPY  |
| 80250   | LTLILDIG  | ---TPSLDD | FYAI | --- | SSHRSRDY | L-RALPFRKK | K-PFSQL | --- |   |     |      |     |     |         |   |     |          |            |



Table with 10 columns: ID, Alignment, Consensus, and various alignment parameters. It lists 1051981 to 1457372 with corresponding alignment details.

Table with 10 columns: ID, Alignment, Consensus, and various alignment parameters. It lists 1201 to 1457372 with corresponding alignment details.

Table with 10 columns: ID, Species, Alignment, Species, Alignment, Species, Alignment, Species, Alignment, Species, Alignment. Contains multiple rows of sequence alignment data.















```

188798
364357
417259
391850 -----GY E
420539 -----RG HC
1649896
280694
381396 -----PS
685453
284413
384436
907966
205730 -----YQ DQIVQQQQIY VQQAQQPAQA APAQQGYPAQ PVPPAGYPPA AAYAGEQPNQ --A
86646 -----PQ VQNPALPFNG QGQI
9721 -----LP RPPPVVINEH HNNQMMA
2612 -----TG
102501 -----YN
98652 -----Y
78159 -----H
240194
193495 -----S
171744 -----S
4564
6035 -----VN GA
256278
120199 -----AP IV
1003994 -----AP IT
145010 -----PP MA
183924 -----PP IS
725911 -----PP IV
1166877 -----PP LV
574353 -----PP IS
277341 -----AP IT
965410 -----AP IT
1040134 -----AP IT
801239 -----AP IT
457049 -----AP IT
777636 -----AP IV
167531 -----AP MT
179443 -----PP MV
388203 -----IA MLPGSEPLAA LQLVFFLSLR PSLGPNNHIS FCSYIHMYGK ISKINLFAPS HLYFLCRSNA FPSGCLGDP SCSLTSCLVFL PAVDPMEKEG M
761034 -----PP MVVSSLSHGS LDVYNTITSH FGLF-SLHLA GARVAHPYR -RRVDLPASS ---LLCCASV
117742 -----TI
506090 -----TI GTI
21911 -----TI GTL
7342346 -----AP IT
435735 -----LP IT
267232 -----AP IT
679497 -----AP IT
457636 -----AP IT
1340042 -----DW LA
225932 -----PC LTTLRATH
346924 -----AQ
760343 -----LA
15147 -----PH STSQAMEPME M
108680
724148
276168
194959 -----SI
345309 -----SI
7189608 -----AI
439783 -----SI
73775 -----SI
681486 -----SI
671673 -----SI
829815 -----TI
413627 -----SI
109090 -----GL
43366 -----AI
706326 -----CI
1157202 -----CI
743174 -----AI
5331 -----CI
713967
151043 -----LI
481570 -----LI
104738 -----LI
689474 -----QS RTERWAATAS PKYADLTVSS RAPI
179470 -----AI
31001 -----AI
155293 -----TL GQ
83606
79026 -----VLIYEVT KPPLQSSPYL APAYS
79053 -----VLIYEVT KPPLQSSPYL APAYS
188294 -----VLIYEVT KPYPQPLLT SNEYS
422236 -----VLIYEIT RPVENLGSS A
59295 -----ALIYEIT RPRGE
91727 -----IVLIYEVT RPRQPVTQ
92869 -----VLIYEVT KPRLQPAQST Q
513929 -----VLIYEVT KPRPPPGTQ
166192 -----VLIYEVT KPRLQPAQST Q
210022 -----VLIYEVT SPH
847083 -----ELIYEIT RPYVQPS
819022 -----VLIQEIT KPDEQATSY LLSQQGVGAA GMNGS
50473 -----VLIQEIT KPDEQATSY LLSQQGVGAA GMNGS
850567 -----PR STELIQEVT S-RPPFPASS LTIGDQSP
183076 -----ELIYNEVT STRTQPPSLF LSGADAAP
1114014 -----VLIYEIT TFRQSPFLS STTGGG
47661 -----LLACHSGS ACTDFRLSTS AHI
6536531 -----NN RAPLLLARYT
277624 -----DD RAPLLLAKYT
77457 -----SS HFFLQCVYM KRLHQQMII EHHYFFRNTH NVIPHVFLLV VI
89431 -----CP TWVLIYEIT RSDDGRPPLA LAEYR
484632 -----VLIYEIT RSDDGRPPLA LAEYR
161998 -----ELIYEVUM RFM
324877 -----VLIYEIT HS
117759
489827 -----VLIYEEM RDPL
115935 -----VLIYEEM RDSM
482781 -----GMQYLPQ VNAHGSNFAI SSHIRGDHA
545919 -----VLIYEEM RDPL
6536562 -----EII KPDNNRAPLL LARYT
309997 -----ELIYEIM GAPNVNGR
316873 -----ARGICLVY GSGVYGIAL
429267
103465 -----H
167039
8637
65963
246409
246352
668220 -----PP M
619500 -----AP IT
64492 -----PP IS
80250
21917
600175 -----AR
721307 -----SQ ATSYLLSQGQ VGAAGMNGS
847084 -----QP S
280696
908144
148879 -----ES IYPDVL
102030 -----YP QSDSVEDESEV DDEDM

```

```

92334 -----LS QHLGAG
146634 -----DA PRFIAEQKAA NPDAAPLQA PA
72485 -----FK MAQMKLQAKQ LQSTKSPASA RITPKKEGPIE RDDHDEDINA PESLDAELRR AGIAVGDQ
124061 -----I
109792 -----SF KPLA
408982 -----SF RPLPIT
149279 -----SF RPOQIT
13526 -----NR APILLSKYS
465497 -----GR PPLPLAEYR
216389 -----GC IPLLLAGYS
17191 -----I
530963 -----GD -TDGLDLGAM TDGLAVQT
84099 -----DQ GNEATAAGGL TENGAA
928715 -----TW PIPSA
480104 -----SI
37144 -----SI
993637 -----SI
706327 -----CI
5366 -----CI
144998 -----PP MA
232199 -----PP IV
60405 -----AP IT
572635 -----AP IT
37912 -----AP IV
819552 -----AP IT
1026351 -----I
352542 -----NE LGSSA
42114 -----GC IPLLLAGYS
204011 -----I
46962 -----I
3452 -----I
1531701 -----I
375250 -----PL LPSPTIKRLL SQLQIDCIMR LTHPRPKLAP
391393 -----WA TGQS
518679 -----I
1272884 -----WR HR
108249 -----I
111885 -----DE TTGPF
228039 -----I
117728 -----HL QFLKIHLIR CQLPKLSLQL FAIKHKFSTL PFPPIQNDK AG
267276 -----SI CIKMTSAANS
295270 -----I
174214 -----AA EPAAENGTAI P
111562 -----AA GGLTENGAA
385026 -----AN GDAVENGGVG QI
47937 -----VG VPQ
191658 -----AA VPEQENNGS
361397 -----AA AQEQENGS
368356 -----AA TQEQENNGS
422287 -----AA AQEQENDS
1051981 -----DE FMNGQGAEQ
512786 -----VD PEQYNGQ
700253 -----EQ EQQFNGQ
171641 -----DD --QFNGQ
447383 -----ES QLNGH
134451 -----ME EIT-NGQ
525556 -----QV LVEGVGDSQQ AFAA
1776212 -----I
443108 -----I
129540 -----AL PLESQALP
341724 -----AL SLDNTLGTVP R
138417 -----AL PLESQALP
158191 -----TW TPRAPMSTPT VPASLNAF
376076 -----RI VSWRFETVTG LGYALNSQLR GGRWYKXHRN T
368607 -----LP EDGASGF
1312592 -----T--PEGABAAA RAVGAAPAEV STTA
46955 -----G--VEGALAGP EDPSHAIAAG VVQAE
1164008 -----G--NVPEGALAAP EGDVVQAFAP GAEA
600771 -----G--VPEGALAAP EDTATATAV AATAE
161654 -----GD NIPEGSLAGP DKDGEIVGSG PSSVEEAAVP TIQPSAQAGA
149140 -----GD NIPEGSLAGP DKDGEIVGSG PSSVEEAAVP TIQPSAQAGA
474692 -----LG -IPEGALAGP EDGGYSNGHA
134758 -----SG -IPEGISGP EDGAGGPGQP VAAAAS
177791 -----TE -VEGALSAP ENHL--SNGI PLVTN
132015 -----SG -IPGALAGP ENGLQTINGI VLAA
917530 -----SG TVPEGALAGP DAQGVFVE
428496 --------EGALAGP DTTA
1276586 -----VD PQTFGVFPASA VAAT
115601 -----LG AMTDGLSVTA
171809 -----PR AISGTTSDS KLDRTFDHLS PPVT
571775 -----IL SITEDPHQVG EASITASGIP GGALAGPDNG TLQANGIVLT A
722302 -----EG PLAAPVV
289694 -----AG PVPPVSS
137978 -----FL GTPLTGPITL N
19116 -----PI TLFVCVN
129801 --------QIQAQSE QLQYQMQQP AQ
80382 -----ND NSVQGYESD IIQQHLLQR LEQQQQQQQQ QQQQGERVG EKSS
141916 -----ND NSVQGYESD IIQQHLLQR LEQQQQQQQQ QQQQGERVG EKSS
187748 -----ND LTSNADGSTN PQQQEQLAQI QQEGIQAPIN KHEQQI
168984 -----I
71808 -----PH MSAATNDTSV SESTSKAVAD DNVAAPL-N
432 -----IP EENENFDVQE AQFR
59395 -----MN GGSDTNGASV DLLPS
2865 -----SG TENNGN
189766 -----QN DS
88183 -----I
216492 -----DS YNQLIQGQE ILQGA
188879 -----DS YNQLIQGQE ILQGA
182850 -----DS YNQLIQGQE ILQGA
174697 -----DS YNQLIQGQE ILQGA
934899 -----GG VPEGALAGPE VFNATAASA
362397 -----A--EGITG-E LPPAPAS
416973 -----TG IPEGALAGPE NGQLSNGAPV TI
551386 -----LG AMTDGLAVQT
15239 -----LG AMTDGLSVTA
497504 -----I
1117682 -----I
252496 -----ID
148867 -----TE NGGSD
423027 -----EP FLPPDPPLSLP EVLDPLGQIQ TQSMVTKSAD TLDQDILQY- LQI
1104996 -----I
29266 -----SA ESQLNHG
171653 -----VM DDQFNGQ
117063 -----VM QEFTNGQ
158104 -----VD ANGAS
160940 -----DA ENGS
2813 -----GS GTENNGN
129541 -----AL PLESQALP
257371 -----I
389086 -----A
73401 -----TL ABEPRSGADL LNFSTIPFVL GRETDTPNDS TFSLLEPWST WDIGG-LDLS ---LPESDYV DPAGPFLSTT IG
1139913 -----TL ABEPRSGADL LNFSTIPFVL GRETDTPNDS TFSLLEPWST WDIGG-LDLS ---IPATDV DPAGPFLSTT IGLKATFWFV YCIGVVHISQ LSKKRTSSRL RVQTDSDHTW P-RRRDVYVL NWEQGALTCI PPRTDIAPGP
1168371 -----TL ABEPRSGADL LNFSTIPFVL GRETDTPNDS TFSLLEPWST WDIGG-LDLS ---IPATDV DPAGPFLSTT IGLKATFWFV YCIGVVHISQ LSKKRTSSRL RVQTDSDHTW P-RRRDVYVL NWEQGALTCI PPRTDIAPGP
698519 -----RL ISRPSYPC
332332 -----AL SLDNTLETVP RVFDNALGWG NSTVTKMSVG IWELLDFCSM LGPGVMLNSN ---IMVVGYC DKGRA
243292 -----AA ENCTAIP
243775 -----AA ENCTAIP
24163 -----AA EQNASVP
1431451 -----I
99398 -----TR IIR
171665 -----DD QFNGQ
15876 -----A
43014 -----I

```



43498  
1148336  
220391  
774567  
138915  
757677  
313819  
290180  
12232  
865310  
312015  
500478  
500460  
243933  
64065  
2938  
196733  
145976  
501440  
71512  
543038  
99402  
1431403  
342880  
417966  
Consensus

MPRHFTF ALNS-TFVVD SEYEFVKELG QGAYGCVVA-  
M TLYSKRHSPN ALNS-TFVVD AEYEFVKELG QGAYGCVVA-  
MQLQRHSPT ALNS-TFVVD SEYQFVKELG QGAYGCVVA-  
M SRSAGSWYES WVRGRITALM-  
M GDLQGRKVKF VFNQ-DFIVD ERYVTTKELG QGAYGIVCA-  
HDVSS-  
MEINTG NGFWGIRSRV  
MSRPGSSRR SSRGHRRES CADGKGEEPK SSSPVSPGS -----MN VDRGRSRVRR PSNPFSEDNL RRRGVHSLLS SPGK-VPHVE RRWKLIREMG SGAYGVVIS-  
MREHL SQTSSSSDEE SSSPVASPVS -----AT VDRGRSRIRR PSNQLAEHNL RKRGVHSPMS SPGK-MPHVE KRWKLIREMG SGAYGVVIS-  
MISVHNF TPLNTVVFIFK KRREVTFNVS DYIEIKDIIG EGAYGIVCS-  
M ENYQKLEKIG EGTYGVVYKA  
MPAPRQLP PPSRPRPPPP ANGGMQRQTS SSSTLVSDSS QLQIAAVPDD PKRLSTRLQG VPAQLSTPDS NQPSINQPSN SHYRKYSSY LTCNTRFDLP PRYRLIHPGL SGSPFLVCAA  
MPAPRQLP PPSRPRPPPP ANGGMQRQTS SSSTLVSDSS QLQIAAI-----

1501  
6423  
160078  
116650  
377992  
289793  
670269  
32808  
156295  
22314  
417978  
414783  
1074946  
865350  
1656563  
333276 QMWLREAVRR LDMDGQ  
422586  
342887  
386771  
14976  
130981  
435286  
1457372  
249807  
1142566  
1008492  
152510  
336937  
1649893  
371270  
82103  
42859  
212507  
212502  
461664  
39613  
91135 NYQNNHNNS NTNANNNAG NAGYNDNNT NNNHNVNSFD NLEKELEFGL DRYC  
103403  
112360  
4266  
168486  
35227  
67581  
59367  
336175  
177826  
212434  
164796  
100890  
288633  
69432  
60279  
166223  
1111368  
7180514  
671172  
69595  
188428  
799680  
178052  
129301  
208817  
424444  
830405  
892596  
186189  
164780  
167312  
119588  
423592  
474667  
459613  
156206  
791811  
---RQARKSW IF--GCFTLS SWPPPWFVD GPRFRINKEA SIRWLGRR-T LIESS----- ----TSHLR AFSVFVVRRA QKLCDFRVA IMKFARLRA RR---YHAAG WPRVPRMDK RVNHRVRELF VDA  
715329 ---VCQVRPY DIADGSLHTG NVIAYVFFIL APGLSLSPA EFRFMTRGS VVRPI----- ----DPLET PSAVKWRINS RFAYDMPPTR SSKSVGDQRD HSRLLRITMG SPLTAAGTAS AALTRSRKET RDAKDAFMLW DAMIITNASL  
511921 ---PILRRP- ----TRSG SWGRPM--PP RPLPASVAEA HHAHALEQL LAEQR----- ----LDLFQ HAGVQDIRYP AVAKPPKNEH QLLQIALSRC KW---IQASD SLGVCAGMMD SAPNRVCLKI SSEAVARSIK DMKVVEQACS  
737951 ---AKTIKV- ----RVSG QEGPSVRNTRK RESRSRVGKK  
545584  
102765  
203555  
302829  
701651  
972433  
931864  
813292  
78187  
406308  
118382 FVWKSFPVPLW RLLAQNVHAA IVSHCTGTPK DQSRSLPAEA RTAIKKVRAT QRMRR----- ----NCGFA FSPTESAGKQ DQAKIIRAYD TSKSNARPSG Y  
100328  
1411022  
741167  
1338511  
756718  
302653  
1311110  
722894  
288507  
757539  
184184  
917307  
6355211  
249241  
216822  
805839  
355172

Table with columns for sequence identifiers (e.g., 53464, 105414, 291876), alignment markers (e.g., QLTGQ, QLSGQ), and sequence names (e.g., PVAVKKIMKP, FSTPVLKSKRT, YREL-KLLKH). The table contains multiple rows of sequence alignment data.

Table with 10 columns: Accession, Alignment, Accession, Alignment, Accession, Alignment, Accession, Alignment, Accession, Alignment. Rows include sequences like 591714, 107905, 99046, etc.

OsMPK20-2 Consensus

601

Main alignment table with 10 columns: Accession, Alignment, Accession, Alignment, Accession, Alignment, Accession, Alignment, Accession, Alignment. Rows include sequences like 127228, 287090, 186494, etc.



|         |  |         |            |            |            |            |            |            |        |        |     |          |           |           |
|---------|--|---------|------------|------------|------------|------------|------------|------------|--------|--------|-----|----------|-----------|-----------|
| 603877  |  | MAEF    | VRAQIFGTTF | EITSRYAGPG | AGGVVSDLQP | -VGMGAPGLV | ---        | CSAKDN     | L      | ---    | --- | TGQVAVK  | KIMKPFSTP |           |
| 140829  |  | MAEF    | VRAQIFGTTF | EITSRY     | ----       | SDLPQ      | -VGMGAPGLV | WRVSSSARDQ | L      | ---    | --- | TGQVAVK  | KIMKPFSTP |           |
| 327107  |  | MAEF    | VRAQIFGTTF | EITSRY     | ----       | TELPQ      | -VGMGAPGLV | ----       | CSAKDQ | L      | --- | TAQPVAIK | KIMKPFSTP |           |
| 329694  |  | MAEF    | VRAQIFGTTF | EITSRY     | ----       | TELPQ      | -VGMGAPGLV | ----       | CSAKDQ | L      | --- | TAQPVAIK | KIMKPFSTP |           |
| 393439  |  | MAEF    | VRAQIFGTTF | EITSRY     | ----       | TELPQ      | -VGMGAPGLV | ----       | CSAKDQ | L      | --- | TAQPVAIK | KIMKPFSTP |           |
| 38942   |  | MAEF    | VRAQIFGTTF | EITTRY     | ----       | TDLPQ      | -VGMGAPGLV | ----       | CSARDT | L      | --- | TGQVAVK  | KIMKPFSTP |           |
| 87588   |  | MAEF    | IRAQIFGTCF | EITSRY     | ----       | VDLPQ      | -VGMGAPGLV | ----       | CSARDQ | L      | --- | TNQPVAIK | KIMKPFSTP |           |
| 443298  |  | MAEF    | VRAQIFGTTF | EITSRY     | ----       | SDLPQ      | -VGMGAPGLV | ----       | CSARDQ | L      | --- | TSQVAVK  | KIMKPFSTP |           |
| 53587   |  | MAEF    | VRAQIFGTTF | EITSRY     | ----       | TDLPQ      | -VGMGAPGLV | ----       | CSARDQ | L      | --- | TGQVAVK  | KIMKPFSTP |           |
| 70072   |  | MDFE    | VKLSIFGTVF | EVTRY      | ----       | VDLPQ      | -VGMGAPGLV | ----       | CSARDQ | L      | --- | TGQVAVK  | KIMKPFSTP |           |
| 13822   |  | MAEF    | VRAQIFGTTF | EITSRY     | ----       | TDLPQ      | -VGMGAPGLV | ----       | CSARDQ | L      | --- | TGQVAVK  | KIMKPFSTP |           |
| 25364   |  | MADF    | IKLSIFGTVF | EVTRY      | ----       | VDLPQ      | -VGMGAPGLV | ----       | CSARDQ | L      | --- | TGQVAVK  | KIMKPFSTP |           |
| 116576  |  |         |            | MVGL       | TILDRY     | ----       | TDLPQ      | -VGMGAPGLV | ----   | CSARDQ | L   | ---      | TSQPVAIK  | KIMKPFSTP |
| 103311  |  | MSAGEP  | TRTQIFGTVF | EITSRY     | ----       | TDLNP      | -VGMGAPGLV | ----       | CSAMDK | L      | --- | TNQNVAIK | KIMKPFSTP |           |
| 26173   |  | MSSDGEF | TRTQIFGTVF | EITNRY     | ----       | TDLNP      | -VGMGAPGLV | ----       | CSAVDK | L      | --- | TGQVAVK  | KIMKPFSTP |           |
| 55352   |  | MSSDGEF | TRTQIFGTVF | EITNRY     | ----       | TDLNP      | -VGMGAPGLV | ----       | CSAVDK | L      | --- | TGQVAVK  | KIMKPFSTP |           |
| 125207  |  | MTNNEEF | IRTQIFGTVF | EITNRY     | ----       | NDLNP      | -VGMGAPGLV | ----       | CSATDT | L      | --- | TSQPVAIK | KIMKPFSTP |           |
| 67307   |  | MTNNEEF | IRTQIFGTVF | EITNRY     | ----       | NDLNP      | -VGMGAPGLV | ----       | CSATDT | L      | --- | TSQPVAIK | KIMKPFSTP |           |
| 185764  |  | MSQEEF  | TRTQIFGTVF | EITNRY     | ----       | GDLPN      | -VGMGAPGLV | ----       | CSAKDK | L      | --- | TNQNVAIK | KIMKPFSTP |           |
| 99366   |  | MSQEEF  | IRTQIFGTVF | EITNRY     | ----       | TDLNP      | -VGMGAPGLV | ----       | CSAKDK | L      | --- | TNQNVAIK | KIMKPFSTP |           |
| 50111   |  | MADF    | VNTSIFGTLF | QITSRY     | ----       | DSLEP      | -VGMDS     | ----       | SARDQ  | L      | --- | TNNSVAIK | KIMKPFSTP |           |
| 87970   |  | MADF    | AKLSIFGTVF | EVTRY      | ----       | SDLPQ      | -VGMGAPGLV | ----       | CSASDQ | L      | --- | TATNVAIK | KIMKPFSTP |           |
| 107532  |  |         |            | MS         | MS         | MS         | MS         | MS         | MS     | MS     | MS  | MS       | MS        |           |
| 604754  |  |         |            | MS         | MS         | MS         | MS         | MS         | MS     | MS     | MS  | MS       | MS        |           |
| 633130  |  |         |            | MS         | MS         | MS         | MS         | MS         | MS     | MS     | MS  | MS       | MS        |           |
| 181927  |  |         |            | MS         | MS         | MS         | MS         | MS         | MS     | MS     | MS  | MS       | MS        |           |
| 69161   |  |         |            | MS         | MS         | MS         | MS         | MS         | MS     | MS     | MS  | MS       | MS        |           |
| 35549   |  |         |            |            |            |            |            |            |        |        |     |          |           |           |
| 230139  |  |         |            |            |            |            |            |            |        |        |     |          |           |           |
| 193325  |  |         |            |            |            |            |            |            |        |        |     |          |           |           |
| 430049  |  |         |            |            |            |            |            |            |        |        |     |          |           |           |
| 479652  |  |         |            |            |            |            |            |            |        |        |     |          |           |           |
| 986652  |  |         |            |            |            |            |            |            |        |        |     |          |           |           |
| 295607  |  |         |            |            |            |            |            |            |        |        |     |          |           |           |
| 114099  |  |         |            |            |            |            |            |            |        |        |     |          |           |           |
| 265170  |  |         |            |            |            |            |            |            |        |        |     |          |           |           |
| 41804   |  |         |            |            |            |            |            |            |        |        |     |          |           |           |
| 500846  |  |         |            |            |            |            |            |            |        |        |     |          |           |           |
| 341622  |  |         |            |            |            |            |            |            |        |        |     |          |           |           |
| 1545705 |  |         |            |            |            |            |            |            |        |        |     |          |           |           |
| 15276   |  |         |            |            |            |            |            |            |        |        |     |          |           |           |
| 391543  |  |         |            |            |            |            |            |            |        |        |     |          |           |           |
| 346451  |  |         |            |            |            |            |            |            |        |        |     |          |           |           |
| 449365  |  |         |            |            |            |            |            |            |        |        |     |          |           |           |
| 54661   |  |         |            |            |            |            |            |            |        |        |     |          |           |           |
| 275309  |  |         |            |            |            |            |            |            |        |        |     |          |           |           |
| 389883  |  |         |            |            |            |            |            |            |        |        |     |          |           |           |
| 61624   |  |         |            |            |            |            |            |            |        |        |     |          |           |           |
| 173235  |  |         |            |            |            |            |            |            |        |        |     |          |           |           |
| 35612   |  |         |            |            |            |            |            |            |        |        |     |          |           |           |
| 35597   |  |         |            |            |            |            |            |            |        |        |     |          |           |           |
| 391476  |  |         |            |            |            |            |            |            |        |        |     |          |           |           |
| 335269  |  |         |            |            |            |            |            |            |        |        |     |          |           |           |
| 377162  |  |         |            |            |            |            |            |            |        |        |     |          |           |           |
| 271149  |  |         |            |            |            |            |            |            |        |        |     |          |           |           |
| 89784   |  |         |            |            |            |            |            |            |        |        |     |          |           |           |
| 114108  |  |         |            |            |            |            |            |            |        |        |     |          |           |           |
| 173207  |  |         |            |            |            |            |            |            |        |        |     |          |           |           |
| 127887  |  |         |            |            |            |            |            |            |        |        |     |          |           |           |
| 29226   |  |         |            |            |            |            |            |            |        |        |     |          |           |           |
| 167765  |  |         |            |            |            |            |            |            |        |        |     |          |           |           |
| 150384  |  |         |            |            |            |            |            |            |        |        |     |          |           |           |
| 57923   |  |         |            |            |            |            |            |            |        |        |     |          |           |           |
| 57928   |  |         |            |            |            |            |            |            |        |        |     |          |           |           |
| 230955  |  |         |            |            |            |            |            |            |        |        |     |          |           |           |
| 172033  |  |         |            |            |            |            |            |            |        |        |     |          |           |           |
| 40306   |  |         |            |            |            |            |            |            |        |        |     |          |           |           |
| 693957  |  |         |            |            |            |            |            |            |        |        |     |          |           |           |
| 508525  |  |         |            |            |            |            |            |            |        |        |     |          |           |           |
| 471145  |  |         |            |            |            |            |            |            |        |        |     |          |           |           |
| 480536  |  |         |            |            |            |            |            |            |        |        |     |          |           |           |
| 471745  |  |         |            |            |            |            |            |            |        |        |     |          |           |           |
| 687176  |  |         |            |            |            |            |            |            |        |        |     |          |           |           |
| 34863   |  |         |            |            |            |            |            |            |        |        |     |          |           |           |
| 57153   |  |         |            |            |            |            |            |            |        |        |     |          |           |           |
| 147961  |  |         |            |            |            |            |            |            |        |        |     |          |           |           |
| 287354  |  |         |            |            |            |            |            |            |        |        |     |          |           |           |
| 281614  |  |         |            |            |            |            |            |            |        |        |     |          |           |           |
| 295852  |  |         |            |            |            |            |            |            |        |        |     |          |           |           |
| 144400  |  |         |            |            |            |            |            |            |        |        |     |          |           |           |
| 136175  |  |         |            |            |            |            |            |            |        |        |     |          |           |           |
| 126818  |  |         |            |            |            |            |            |            |        |        |     |          |           |           |
| 2138682 |  |         |            |            |            |            |            |            |        |        |     |          |           |           |
| 48096   |  |         |            |            |            |            |            |            |        |        |     |          |           |           |
| 179022  |  |         |            |            |            |            |            |            |        |        |     |          |           |           |
| 778216  |  |         |            |            |            |            |            |            |        |        |     |          |           |           |
| 665550  |  |         |            |            |            |            |            |            |        |        |     |          |           |           |
| 190738  |  |         |            |            |            |            |            |            |        |        |     |          |           |           |
| 1107049 |  |         |            |            |            |            |            |            |        |        |     |          |           |           |
| 504269  |  |         |            |            |            |            |            |            |        |        |     |          |           |           |
| 432134  |  |         |            |            |            |            |            |            |        |        |     |          |           |           |
| 59068   |  |         |            |            |            |            |            |            |        |        |     |          |           |           |
| 336185  |  |         |            |            |            |            |            |            |        |        |     |          |           |           |
| 343155  |  |         |            |            |            |            |            |            |        |        |     |          |           |           |
| 326648  |  |         |            |            |            |            |            |            |        |        |     |          |           |           |
| 425863  |  |         |            |            |            |            |            |            |        |        |     |          |           |           |
| 436998  |  |         |            |            |            |            |            |            |        |        |     |          |           |           |
| 257317  |  |         |            |            |            |            |            |            |        |        |     |          |           |           |
| 998070  |  |         |            |            |            |            |            |            |        |        |     |          |           |           |
| 49449   |  |         |            |            |            |            |            |            |        |        |     |          |           |           |
| 498377  |  |         |            |            |            |            |            |            |        |        |     |          |           |           |
| 184715  |  |         |            |            |            |            |            |            |        |        |     |          |           |           |
| 51223   |  |         |            |            |            |            |            |            |        |        |     |          |           |           |
| 66669   |  |         |            |            |            |            |            |            |        |        |     |          |           |           |
| 649898  |  |         |            |            |            |            |            |            |        |        |     |          |           |           |
| 253817  |  |         |            |            |            |            |            |            |        |        |     |          |           |           |
| 618068  |  |         |            |            |            |            |            |            |        |        |     |          |           |           |
| 108847  |  |         |            |            |            |            |            |            |        |        |     |          |           |           |
| 33629   |  |         |            |            |            |            |            |            |        |        |     |          |           |           |
| 54715   |  |         |            |            |            |            |            |            |        |        |     |          |           |           |
| 88920   |  |         |            |            |            |            |            |            |        |        |     |          |           |           |
| 51479   |  |         |            |            |            |            |            |            |        |        |     |          |           |           |
| 86943   |  |         |            |            |            |            |            |            |        |        |     |          |           |           |
| 100835  |  |         |            |            |            |            |            |            |        |        |     |          |           |           |
| 319719  |  |         |            |            |            |            |            |            |        |        |     |          |           |           |
| 822494  |  |         |            |            |            |            |            |            |        |        |     |          |           |           |
| 161919  |  |         |            |            |            |            |            |            |        |        |     |          |           |           |
| 158631  |  |         |            |            |            |            |            |            |        |        |     |          |           |           |
| 115223  |  |         |            |            |            |            |            |            |        |        |     |          |           |           |
| 344665  |  |         |            |            |            |            |            |            |        |        |     |          |           |           |
| 178050  |  |         |            |            |            |            |            |            |        |        |     |          |           |           |
| 234927  |  |         |            |            |            |            |            |            |        |        |     |          |           |           |
| 328916  |  |         |            |            |            |            |            |            |        |        |     |          |           |           |
| 273327  |  |         |            |            |            |            |            |            |        |        |     |          |           |           |
| 338804  |  |         |            |            |            |            |            |            |        |        |     |          |           |           |
| 527701  |  |         |            |            |            |            |            |            |        |        |     |          |           |           |
| 81317   |  |         |            |            |            |            |            |            |        |        |     |          |           |           |
| 831329  |  |         |            |            |            |            |            |            |        |        |     |          |           |           |
| 676624  |  |         |            |            |            |            |            |            |        |        |     |          |           |           |
| 826941  |  |         |            |            |            |            |            |            |        |        |     |          |           |           |
| 77377   |  |         |            |            |            |            |            |            |        |        |     |          |           |           |
| 59915   |  |         |            |            |            |            |            |            |        |        |     |          |           |           |
| 160641  |  |         |            |            |            |            |            |            |        |        |     |          |           |           |



Table with multiple columns containing sequence identifiers (e.g., 108839, 1536187, 281708), sequence names (e.g., SYRSRFTPPF, RCTQISISLVY, LVIHLSLTSY), and alignment characters (e.g., ---VVAKRR, RS-----, -GE--GCAIK, KIIINNTK--). The table represents a multiple sequence alignment of various protein sequences.

Table with 10 columns: Accession, Species, Position, Consensus, and Alignment. It displays a multiple sequence alignment of various protein sequences, including entries like OsmPK21-1, OsmPK17-2, and OsmPK20-2. The alignment shows conserved regions across different species, with gaps indicated by dashes.

|         |            |             |           |        |           |      |      |         |         |       |      |     |     |        |             |             |     |      |          |          |     |
|---------|------------|-------------|-----------|--------|-----------|------|------|---------|---------|-------|------|-----|-----|--------|-------------|-------------|-----|------|----------|----------|-----|
| 1588194 | -----      | --MFLCRTLRL | EKILKK    | ---    | FLSEAGVSE | NI   | ---  | ISILDII | KPPSI   | -EQF  | KEV  | YL  | --- | IQELME | TDLHMRVIRTQ | D           | --- | LSDD | HAQYFIVQ | ---      |     |
| 98485   | -----      | --MFLCRTLRL | EKILKK    | ---    | FLSEAGVSE | NI   | ---  | ISILDII | KPPSI   | -DAP  | KEV  | YL  | --- | IQELME | TDLHMRVIRTQ | D           | --- | LSDD | HAQYFIVQ | ---      |     |
| 1443964 | -----      | --MFLCRTLRL | EKILKK    | ---    | FLSEAGVSE | NI   | ---  | ISILDII | KPPSI   | -EAF  | KEV  | YL  | --- | IQELME | TDLHMRVIRTQ | D           | --- | LSDD | HAQYFIVQ | ---      |     |
| 864221  | -----      | --MFLCRTLRL | EKILKK    | ---    | FLSEAGVSE | NI   | ---  | ISILDII | KPPSI   | -DAP  | KEV  | YL  | --- | IQELME | TDLHMRVIRTQ | D           | --- | LSDD | HAQYFIVQ | ---      |     |
| 903905  | -----      | --MFLCRTLRL | EKILKK    | ---    | FLSEAGVSE | NI   | ---  | ISILDII | RPASL   | -EAF  | KEV  | YL  | --- | IQELME | TDLHMRVIRTQ | D           | --- | LSDD | HAQYFIVQ | ---      |     |
| 1147795 | -----      | --MFLCRTLRL | EKILKK    | ---    | FLSEAGVSE | NI   | ---  | ISILDII | KPPSI   | -EQF  | KEV  | YL  | --- | IQELME | TDLHMRVIRTQ | D           | --- | LSDD | HAQYFIVQ | ---      |     |
| 622735  | -----      | --MFLCRTLRL | EKILKK    | ---    | FLSEAGVSE | NI   | ---  | ISILDIV | KPPSL   | -DAP  | KEV  | YL  | --- | IQELME | TDLHMRVIRTQ | D           | --- | LSDD | HAQYFIVQ | ---      |     |
| 166786  | -----      | --MFLCRTLRL | EKILKK    | ---    | FLSEAGVSE | NI   | ---  | ISILDII | KPPSL   | -DAP  | KEV  | YL  | --- | IQELME | TDLHMRVIRTQ | D           | --- | LSDD | HAQYFIVQ | ---      |     |
| 2641010 | -----      | --MFLCRTLRL | EKILKK    | ---    | FLSEAGVSE | NI   | ---  | ISILDII | KPPSI   | -EQF  | KEV  | YL  | --- | IQELME | TDLHMRVIRTQ | D           | --- | LSDD | HAQYFIVQ | ---      |     |
| 28678   | -----      | --MFLCRTLRL | EKILKK    | ---    | FLSEAGVSE | NI   | ---  | ISILDII | KPPSI   | -DAP  | KEV  | YL  | --- | IQELME | TDLHMRVIRTQ | D           | --- | LSDD | HAQYFIVQ | ---      |     |
| 101027  | -----      | --MFLCRTLRL | EKILKK    | ---    | FLSEAGVSE | NI   | ---  | ISILDII | KPPSL   | -EAF  | KEV  | YL  | --- | IQELME | TDLHMRVIRTQ | D           | --- | LSDD | HAQYFIVQ | ---      |     |
| 564549  | -----      | --MFLCRTLRL | EKILKK    | ---    | FLSEAGVSE | NI   | ---  | ISILDII | RPASL   | -EAF  | KEV  | YL  | --- | IQELME | TDLHMRVIRTQ | D           | --- | LSDD | HAQYFIVQ | ---      |     |
| 227465  | -----      | --MFLCRTLRL | EKILKK    | ---    | FLSEAGVSE | NI   | ---  | ISILDII | KPPSI   | -EQF  | KEV  | YL  | --- | IQELME | TDLHMRVIRTQ | D           | --- | LSDD | HAQYFIVQ | ---      |     |
| 18095   | -----      | --MFLCRTLRL | EKILKK    | ---    | FLSEAGVSE | NI   | ---  | ISILDIV | KPPSL   | -EAF  | KEV  | YL  | --- | IQELME | TDLHMRVIRTQ | D           | --- | LSDD | HAQYFIVQ | ---      |     |
| 338545  | -----      | --MFLCRTLRL | EKILKK    | ---    | FLSEAGVSE | NI   | ---  | ISILDII | KPPSI   | -EQF  | KEV  | YL  | --- | IQELME | TDLHMRVIRTQ | D           | --- | LSDD | HAQYFIVQ | ---      |     |
| 134728  | -----      | --MFLCRTLRL | EKILKK    | ---    | FLSEAGVSE | NI   | ---  | ISILDII | KPPSL   | -EAF  | KEV  | YL  | --- | IQELME | TDLHMRVIRTQ | D           | --- | LSDD | HAQYFIVQ | ---      |     |
| 275037  | -----      | --MFLCRTLRL | EKILKK    | ---    | FLSEAGVSE | NI   | ---  | ISILDII | KPPSI   | -EQF  | KEV  | YL  | --- | IQELME | TDLHMRVIRTQ | D           | --- | LSDD | HAQYFIVQ | ---      |     |
| 503339  | -----      | --MFLCRTLRL | EKILKK    | ---    | FLSEAGVSE | NI   | ---  | ISILDII | KPPSL   | -DAP  | KEV  | YL  | --- | IQELME | TDLHMRVIRTQ | D           | --- | LSDD | HAQYFIVQ | ---      |     |
| 40745   | -----      | --MFLCRTLRL | EKILKK    | ---    | YFQEQNVSE | NI   | ---  | ISIVDII | RPPSI   | -EAF  | KEV  | YL  | --- | IQELME | TDLHMRVIRTQ | D           | --- | LSDD | HAQYFIVQ | ---      |     |
| 43876   | -----      | --MFLCRTLRL | EKILKR    | ---    | FFAEHQVSE | NL   | ---  | ITVIDLI | KPLSY   | -DSF  | QEV  | YL  | --- | IQELME | TDLYRVIRTQ  | P           | --- | LSDD | HVQYFVQ  | ---      |     |
| 14716   | -----      | --MFLCRTLRL | EKILKR    | ---    | FFAEHQVSE | NL   | ---  | ITVIDLI | KPLSY   | -DSF  | QEV  | YL  | --- | IQELME | TDLYRVIRTQ  | P           | --- | LSDD | HVQYFVQ  | ---      |     |
| 15138   | -----      | --MFLCRTLRL | EKILKR    | ---    | YFAEQVSE  | NI   | ---  | ISIVDII | KPFSY   | -DSF  | KEV  | YL  | --- | IQELME | TDLYRVIRTQ  | T           | --- | LSDD | HVQYFVQ  | ---      |     |
| 67488   | -----      | --MFLCRTLRL | EKILKK    | ---    | YFQEQNVSE | NI   | ---  | ISVLDII | KPFSY   | -PNF  | KEV  | YL  | --- | IQELME | TDLHRVIRTQ  | D           | --- | LSDD | HAQYFIVQ | ---      |     |
| 28680   | -----      | --MFLCRTLRL | EKILKK    | ---    | FLSEAGVSE | NI   | ---  | ISILDII | KPPSL   | -EAF  | KEV  | YL  | --- | IQELME | TDLHMRVIRTQ | D           | --- | LSDD | HAQYFIVQ | ---      |     |
| 177514  | -----      | --MFLCRTLRL | EKILKK    | ---    | FFSETCVNE | NI   | ---  | ISVLDII | KPDSL   | -ESF  | KEI  | YF  | --- | IQELMQ | TDLHRVIRTQ  | H           | --- | LTDD | HCQYFVQ  | ---      |     |
| 53880   | -----      | --MFLCRTLRL | EKILKK    | ---    | FFSETCVNE | NI   | ---  | ISILDII | KPPTI   | -DSF  | KEI  | YF  | --- | IQELMQ | TDLHRVIRTQ  | H           | --- | LTDD | HCQYFVQ  | ---      |     |
| 778168  | -----      | --MFLCRTLRL | EKILKK    | ---    | FFSETCVNE | NI   | ---  | ISILDII | KPPTI   | -DSF  | KEI  | YF  | --- | IQELMQ | TDLHRVIRTQ  | H           | --- | LTDD | HCQYFVQ  | ---      |     |
| 388025  | -----      | --MFLCRTLRL | EKILKK    | ---    | FFSETCVNE | NI   | ---  | ISILDIV | KPDSL   | -EDF  | KEV  | YF  | --- | IQELMQ | TDLHRVIRTQ  | S           | --- | LSDD | HAQYFIVQ | ---      |     |
| 581713  | -----      | --MFLCRTLRL | EKILKK    | ---    | FFSETCVNE | NI   | ---  | ISILDIV | KPDSL   | -DHF  | KEV  | YF  | --- | IQELMQ | TDLHRVIRTQ  | P           | --- | LSDD | HAQYFIVQ | ---      |     |
| 229317  | -----      | --MFLCRTLRL | EKILKK    | ---    | FFSETCVNE | NI   | ---  | ISILDIV | KPDSL   | -DHF  | KEV  | YF  | --- | IQELMQ | TDLHRVIRTQ  | P           | --- | LSDD | HAQYFIVQ | ---      |     |
| 829657  | -----      | --MFLCRTLRL | EKILKR    | ---    | FFSETCVNE | NI   | ---  | ISILDIT | RPSSL   | -EEF  | KEV  | YF  | --- | IQEPMQ | TDLHRVIRTQ  | Q           | --- | LTDD | HCQYFVQ  | ---      |     |
| 70959   | -----      | --MFLCRTLRL | EKILKK    | ---    | FFSETCVNE | NI   | ---  | ITVIDLI | KPSSL   | -EEF  | KEI  | YF  | --- | IQELMQ | TDLHRVIRTQ  | Q           | --- | LTDD | HCQYFVQ  | ---      |     |
| 32857   | -----      | --MFLCRTLRL | EKILKK    | ---    | FFSETCVNE | NI   | ---  | ISILDII | KPPTI   | -EEF  | TEI  | YF  | --- | IQELMQ | TDLHRVIRTQ  | Q           | --- | LTDD | HCQYFVQ  | ---      |     |
| 561172  | -----      | --MFLCRTLRL | EKILKK    | ---    | FFSDSCVNE | NI   | ---  | ISILDIV | KPSSL   | -DEP  | TEI  | YF  | --- | VQELMQ | TDLHRVIRTQ  | T           | --- | LTDD | HCQYFVQ  | ---      |     |
| 573944  | -----      | --MFLCRTLRL | EKILKK    | ---    | FFSDSCVNE | NI   | ---  | ISILDII | KPSSL   | -DDF  | KEI  | YF  | --- | IQELMQ | TDLHRVIRTQ  | Q           | --- | LTDD | HCQYFVQ  | ---      |     |
| 740770  | -----      | --MFLCRTLRL | EKILKR    | ---    | FFSDTCVNE | NI   | ---  | ISILSIV | KPTEL   | -DSE  | KEI  | YF  | --- | IQEPMQ | TDLHRVIRTQ  | K           | --- | LTDD | HCQYFVQ  | ---      |     |
| 16071   | -----      | --MFLCRTLRL | EKILKR    | ---    | FFSEVCVNE | NI   | ---  | VSILDII | KPPSY   | -DDF  | TEI  | YF  | --- | VQELMQ | TDLHRVIRTQ  | I           | --- | LTDD | HCQYFVQ  | ---      |     |
| 1126092 | -----      | --MFLCRTLRL | EKILKR    | ---    | FFSEVCVNE | NI   | ---  | VSILDII | KPPSY   | -DDF  | TEI  | YF  | --- | VQELMQ | TDLHRVIRTQ  | I           | --- | LTDD | HCQYFVQ  | ---      |     |
| 478842  | -----      | --MFLCRTLRL | EKILKK    | ---    | FFAESVNE  | NI   | ---  | VAILDII | KPSSM   | -DSF  | KEI  | YF  | --- | VQELME | TDLHRVIRTQ  | H           | --- | LSDD | HAQYFIVQ | ---      |     |
| 46649   | -----      | --MFLCRTLRL | EKILKR    | ---    | LFAETCLNE | NI   | ---  | VSILSII | KPSSL   | -DDF  | KEI  | YF  | --- | VQELME | TDLHRVIRTQ  | L           | --- | LSDD | HAQYFIVQ | ---      |     |
| 601377  | -----      | --MFLCRTLRL | EKILKK    | ---    | FFSQVVNE  | NI   | ---  | IAILDII | KPPSF   | -DEF  | KEI  | YF  | --- | VQELMQ | TDLHMRVIRTQ | H           | --- | LSDD | HAQYFIVQ | ---      |     |
| 866574  | -----      | --MFLCRTLRL | EKILKR    | ---    | HFPH      | ---  | E NI | IAILDII | RPPSI   | -NQF  | NEV  | YL  | --- | VQELME | TDLHRVIRTQ  | E           | --- | LSDD | HAQYFIVQ | ---      |     |
| 521401  | -----      | --MFLCRTLRL | EKILKR    | ---    | HFPH      | ---  | E NI | IAILDII | RPPSI   | -NQF  | NEV  | YL  | --- | VQELME | TDLHRVIRTQ  | E           | --- | LSDD | HAQYFIVQ | ---      |     |
| 850251  | -----      | --MFLCRTLRL | EKILKR    | ---    | HFPH      | ---  | E NI | IAILDII | RPPSI   | -NQF  | NEV  | YL  | --- | VQELME | TDLHRVIRTQ  | E           | --- | LSDD | HAQYFIVQ | ---      |     |
| 832111  | -----      | --MFLCRTLRL | EKILKR    | ---    | HFPH      | ---  | E NI | ISILDII | RPSSF   | -EMF  | KEV  | YL  | --- | VQELME | TDLHRVIRTQ  | N           | --- | LSDD | HAQYFIVQ | ---      |     |
| 832110  | -----      | --MFLCRTLRL | EKILKR    | ---    | HFPH      | ---  | E NI | ISILDII | RPSSF   | -EMF  | KEV  | YL  | --- | VQELME | TDLHRVIRTQ  | N           | --- | LSDD | HAQYFIVQ | ---      |     |
| 676666  | -----      | --MFLCRTLRL | EKILKR    | ---    | HFCH      | ---  | E NI | ISILDII | QPLSF   | -ETP  | KEV  | YL  | --- | VQELME | TDLHRVIRTQ  | K           | --- | LSDD | HAQYFIVQ | ---      |     |
| 1143376 | -----      | --MFLCRTLRL | EKILKR    | ---    | HFCH      | ---  | E NI | ISILDII | QPPSF   | -ELP  | KEV  | YL  | --- | VQELME | TDLHRVIRTQ  | K           | --- | LSDD | HAQYFIVQ | ---      |     |
| 457401  | -----      | --MFLCRTLRL | EKILKR    | ---    | HFPH      | ---  | E NI | ISILDII | CPSSY   | -DDF  | REV  | YL  | --- | VQELME | TDLHRVIRTQ  | Q           | --- | LSDD | HAQYFIVQ | ---      |     |
| 834255  | -----      | --MFLCRTLRL | EKILKR    | ---    | HFPH      | ---  | E NI | ISILDII | QPPSF   | -DDF  | REV  | YL  | --- | VQELME | TDLHRVIRTQ  | Q           | --- | LSDD | HAQYFIVQ | ---      |     |
| 133042  | -----      | --MFLCRTLRL | EKILKR    | ---    | HFPH      | ---  | E NI | ISILDII | RPSSL   | -EDF  | KEV  | YL  | --- | VQELME | TDLHRVIRTQ  | Q           | --- | LSDD | HAQYFIVQ | ---      |     |
| 30507   | -----      | --MFLCRTLRL | EKILKR    | ---    | HFPH      | ---  | E NI | ISILDII | RPSSL   | -DEF  | KEV  | YL  | --- | VQELME | TDLHRVIRTQ  | E           | --- | LSDD | HAQYFIVQ | ---      |     |
| 646041  | -----      | --MFLCRTLRL | EKILKR    | ---    | HFPH      | ---  | E NI | ISILDII | RPSSL   | -QDF  | KEV  | YL  | --- | VQELME | TDLHRVIRTQ  | H           | --- | LSDD | HAQYFIVQ | ---      |     |
| 570964  | -----      | --MFLCRTLRL | EKILKR    | ---    | HFPH      | ---  | E NI | ISILDII | RPSSL   | -ADP  | KEV  | YL  | --- | VQELME | TDLHRVIRTQ  | Q           | --- | LSDD | HAQYFIVQ | ---      |     |
| 301734  | -----      | --MFLCRTLRL | EKILKR    | ---    | HFPH      | ---  | E NI | ISILDII | QPASV   | -EEF  | KEV  | YL  | --- | VQELME | TDLHRVIRTQ  | T           | --- | LSDD | HAQYFIVQ | ---      |     |
| 154378  | -----      | --MFLCRTLRL | EKILKR    | ---    | HFPH      | ---  | E NI | ISILDII | RPSSL   | -ADP  | TEV  | YL  | --- | VQELME | TDLHRVIRTQ  | T           | --- | LSDD | HAQYFIVQ | ---      |     |
| 90189   | -----      | --MFLCRTLRL | EKILKR    | ---    | HFPH      | ---  | E NI | IAILDII | RPSSL   | -ADP  | TEV  | YL  | --- | VQELME | TDLHRVIRTQ  | E           | --- | LSDD | HAQYFIVQ | ---      |     |
| 448371  | -----      | --MFLCRTLRL | EKILKR    | ---    | HFPH      | ---  | E NI | ISILDII | RPDSL   | -EEF  | REV  | YL  | --- | VQELME | TDLHMRVIRTQ | E           | --- | LSDD | HAQYFIVQ | ---      |     |
| 476779  | -----      | --MFLCRTLRL | EKILKR    | ---    | HFPH      | ---  | E NI | ISILDII | RPDSL   | -EEF  | REV  | YL  | --- | VQELME | TDLHMRVIRTQ | E           | --- | LSDD | HAQYFIVQ | ---      |     |
| 68819   | -----      | --MFLCRTLRL | EKILKR    | ---    | HFPH      | ---  | E NI | IAILDII | RPSSY   | -ADP  | KEV  | YL  | --- | VQELME | TDLHRVIRTQ  | E           | --- | LSDD | HAQYFIVQ | ---      |     |
| 2671102 | -----      | --MFLCRTLRL | EKILKR    | ---    | HFPH      | ---  | E NI | IAILDII | RPSSL   | -QDF  | TEV  | YL  | --- | VQELME | TDLHRVIRTQ  | E           | --- | LSDD | HAQYFIVQ | ---      |     |
| 940143  | -----      | --MFLCRTLRL | EKILKR    | ---    | HFPH      | ---  | E NI | ISILDII | RPSSL   | -NEP  | REV  | YL  | --- | VQELME | TDLHMRVIRTQ | E           | --- | LSDD | HAQYFIVQ | ---      |     |
| 585786  | -----      | --MFLCRTLRL | EKILKR    | ---    | HFPH      | ---  | E NI | IAILDII | RPSSL   | -AEP  | REV  | YL  | --- | VQELME | TDLHMRVIRTQ | E           | --- | LSDD | HAQYFIVQ | ---      |     |
| 349085  | -----      | --MFLCRTLRL | EKILKR    | ---    | HFPH      | ---  | E NI | ISILDII | RPSSL   | -NEP  | REV  | YL  | --- | VQELME | TDLHMRVIRTQ | E           | --- | LSDD | HAQYFIVQ | ---      |     |
| 1539717 | -----      | --MFLCRTLRL | EKILKR    | ---    | HFPH      | ---  | E NI | ISILDII | RPSSM   | -ESP  | KEV  | YL  | --- | IQELME | TDLHMRVIRTQ | E           | --- | LSDD | HAQYFIVQ | ---      |     |
| 24638   | -----      | --MFLCRTLRL | EKILKR    | ---    | HFPH      | ---  | E NI | ISILDII | KPSSF   | -EAF  | KEV  | YL  | --- | VQELME | TDLHMRVIRTQ | E           | --- | LSDD | HAQYFIVQ | ---      |     |
| 75000   | -----      | --MFLCRTLRL | EKILKR    | ---    | HFPH      | ---  | E NI | ISILDII | KPSSF   | -EAF  | KEV  | YL  | --- | VQELME | TDLHMRVIRTQ | E           | --- | LSDD | HAQYFIVQ | ---      |     |
| 1245527 | -----      | --MFLCRTLRL | EKILKR    | ---    | HFPH      | ---  | E NI | ISILDII | RPSSL   | -DDF  | KEV  | YL  | --- | VQELME | TDLHRVIRTQ  | E           | --- | LSDD | HAQYFIVQ | ---      |     |
| 103018  | -----      | --MFLCRTLRL | EKILKR    | ---    | HFPH      | ---  | E NI | ISILDII | RPASI   | -DAP  | NEI  | YL  | --- | IQELME | TDLHMRVIRTQ | E           | --- | LSDD | HAQYFIVQ | ---      |     |
| 43883   | -----      | --MFLCRTLRL | EKILKR    | ---    | WFAH      | ---  | E NI | ISILDII | KPSTY   | -EGF  | SEV  | YL  | --- | IQELME | TDLHRVIRTQ  | E           | --- | LSDD | HAQYFIVQ | ---      |     |
| 58913   | CILLNLSISD | LI          | VFLCRTLRL | EKILKR | ---       | WFSH | ---  | E NI    | ISILDIV | KPPSI | -EEF | SEV | YL  | ---    | IQELME      | TDLHMRVIRTQ | D   | ---  | LSDD     | HAQYFIVQ | --- |
| 18326   | -----      | --MFLCRTLRL | EKILKR    | ---    | HFPH      | ---  | E NI | ISILDII | RPPNL   | -ESP  | TQV  | YL  | --- | VQELME | TDLHMRVIRTQ | E           | --- | LSDD | HAQYFIVQ | ---      |     |
| 301059  | -----      | --MFLCRTLRL | EKILKR    | ---    | HFPH      | ---  | E NI | ISILDII | RPPNL   | -ESP  | TQV  | YL  | --- | VQELME | TDLHMRVIRTQ | E           | --- | LSDD | HAQYFIVQ | ---      |     |
| 12410   | -----      | --MFLCRTLRL | EKILKR    | ---    | HFPH      | ---  | E NI | ISILDII | RPPNL   | -ESP  | TQV  | YL  | --- | VQ     | ---         | ---         | --- | ---  | ---      | ---      |     |
| 18327   | -----      | --MFLCRTLRL | EKILKR    | ---    | HFPH      | ---  | E NI | ISILDII | RPPNL   | -ESP  | TQV  | YL  | --- | VQELME | TDLHMRVIRTQ | E           | --- | LSDD | HAQYFIVQ | ---      |     |
| 184754  | -----      | --MFLCRTLRL | EKILKR    | ---    | YFKH      | ---  | E NI | ITVFDIQ | RPLDF   | -ENF  | NEV  | YL  | --- | IQELMQ | TDLHKVIRTQ  | A           | --- | LTDD | HCQYFVQ  | ---      |     |
| 99455   | -----      | --MFLCRTLRL | EKILKR    | ---    | YFKH      | ---  | E NI | ISIFDIQ | KPGSF   | -EDF  | KEV  | YL  | --- | IQELMQ | TDLHRAIISQ  | R           | --- | LTDD | HVQYFVQ  | ---      |     |
| 706256  | -----      | --MFLCRTLRL | EKILKR    | ---    | YFKH      | ---  | E NI | ITIFNIQ | KPDSF   | -ENF  | NEV  | YL  | --- | IQELMQ | TDLHRVIRTQ  | M           | --- | LTDD | HCQYFVQ  | ---      |     |



|         |              |        |     |        |        |     |              |       |        |        |        |        |           |           |     |      |         |     |       |           |
|---------|--------------|--------|-----|--------|--------|-----|--------------|-------|--------|--------|--------|--------|-----------|-----------|-----|------|---------|-----|-------|-----------|
| OsmPK6  | ---IDAKRTL   | EKILRL | --- | HMD-HE | NIV    | --- | AIRDII       | PPPPQ | ---R   | NDV-YI | ---    | AYELMD | DLHQIIRSN | QA        | --- | LSEB | HCQYFLQ | --- |       |           |
| AtMPK3  | ---MDAKRTL   | EKILRL | --- | HLD-HE | NII    | --- | AIRDV        | PPPLR | ---RQF | SDV-YI | ---    | STELMD | DLHQIIRSN | QS        | --- | LSEB | HCQYFLQ | --- |       |           |
| OsmPK3  | ---MDAKRTL   | EKILRL | --- | HLD-HE | NII    | --- | GIRDVI       | PPPII | ---QAF | NDV-YI | ---    | AATEMD | DLHIIIRSN | QE        | --- | LSEB | HCQYFLQ | --- |       |           |
| 206269  | ---VLAKRTY   | EKILKL | --- | ALRH   | E      | N   | ---IISLSDIF  | ISP   | ---    | L      | EDI-YF | ---    | VTELLG    | DLHRL     | --- | Q    | SR      | --- | PLEKQ | FIQYFLQIL |
| 154265  | ---VLAKRTY   | EKILKL | --- | ALRH   | E      | N   | ---IISLSDIF  | ISP   | ---    | L      | EDI-YF | ---    | VTELLG    | DLHRL     | --- | Q    | SR      | --- | PLEKQ | FIQYFLQIL |
| 168032  | ---VLAKRTY   | EKILKL | --- | ALRH   | E      | N   | ---IISLSDIF  | ISP   | ---    | L      | EDI-YF | ---    | VTELLG    | DLHRL     | --- | Q    | SR      | --- | PLEKQ | FIQYFLQIL |
| 307550  | ---VLAKRTY   | EKILKL | --- | ALRH   | E      | N   | ---IISLSDIF  | ISP   | ---    | L      | EDI-YF | ---    | VTELLG    | DLHRL     | --- | Q    | SR      | --- | PLEKQ | FIQYFLQIL |
| 320251  | ---VLSKRTY   | EKILKL | --- | HLRH   | E      | N   | ---IISLSDIF  | ISP   | ---    | L      | EDI-YF | ---    | VTELLG    | DLHRL     | --- | T    | SR      | --- | PLEKQ | FIQYFLQIL |
| 356517  | ---VLAKRTY   | EKILKL | --- | HLRH   | E      | N   | ---IISLSDIF  | ISP   | ---    | L      | EDI-YF | ---    | VTELLG    | DLHRL     | --- | T    | SR      | --- | PLEKQ | FIQYFLQIM |
| 113434  | ---VLAKRTY   | EKILKL | --- | HIQH   | E      | N   | ---IISLSDIF  | ISP   | ---    | L      | EDI-YF | ---    | VTELLG    | DLHRL     | --- | T    | SR      | --- | PLEKQ | FIQYFLQIL |
| 28887   | ---VLAKRTY   | EKILKL | --- | HIQH   | E      | N   | ---IISLSDIF  | ISP   | ---    | L      | EDI-YF | ---    | VTELLG    | DLHRL     | --- | T    | SR      | --- | PLEKQ | FIQYFLQIL |
| 16635   | ---VLSKRTY   | EKILKL | --- | HIQH   | E      | N   | ---IISLSDIF  | ISP   | ---    | L      | EDI-YF | ---    | VTELLG    | DLHRL     | --- | T    | SR      | --- | PLEKQ | FIQYFLQIL |
| 6923    | ---VLSKRTY   | EKILKL | --- | HIQH   | E      | N   | ---IISLSDIF  | ISP   | ---    | L      | EDI-YF | ---    | VTELLG    | DLHRL     | --- | T    | SR      | --- | PLEKQ | FIQYFLQIL |
| 807502  | ---VLSKRTY   | EKILKL | --- | HIQH   | E      | N   | ---IISLSDIF  | ISP   | ---    | L      | EDI-YF | ---    | VTELLG    | DLHRL     | --- | T    | SR      | --- | PLEKQ | FIQYFLQIL |
| 129058  | ---VLSKRTY   | EKILKL | --- | HIQH   | E      | N   | ---IISLSDIF  | ISP   | ---    | L      | EDI-YF | ---    | VTELLG    | DLHRL     | --- | T    | SR      | --- | PLEKQ | FIQYFLQIL |
| 359241  | ---VLSKRTY   | EKILKL | --- | HIQH   | E      | N   | ---IISLSDIF  | ISP   | ---    | L      | EDI-YF | ---    | VTELLG    | DLHRL     | --- | T    | SR      | --- | PLEKQ | FIQYFLQIL |
| 53282   | ---VLAKRTY   | EKILKL | --- | HIQH   | E      | N   | ---IISLNDVF  | ISP   | ---    | L      | EDI-YF | ---    | VTELLG    | DLHRL     | --- | S    | SR      | --- | PLEKQ | FIQYFLQIL |
| 117789  | ---VLAKRTY   | EKILKL | --- | HIQH   | E      | N   | ---IISLSDVF  | ISP   | ---    | L      | EDI-YF | ---    | VTELLG    | DLHRL     | --- | T    | SR      | --- | PLEKQ | FIQYFLQIL |
| 170586  | ---VLAKRTY   | EKILKL | --- | HIQH   | E      | N   | ---IISLSDVF  | ISP   | ---    | L      | EDI-YF | ---    | VTELLG    | DLHRL     | --- | T    | SR      | --- | PLEKQ | FIQYFLQIL |
| 162119  | ---VLAKRTY   | EKILKL | --- | HIQH   | E      | N   | ---IISLSDVF  | ISP   | ---    | L      | EDI-YF | ---    | VTELLG    | DLHRL     | --- | T    | SR      | --- | PLEKQ | FIQYFLQIL |
| 560244  | ---VLSKRTY   | EKILKL | --- | HIQH   | E      | N   | ---IISLSDVF  | ISP   | ---    | L      | EDI-YF | ---    | VTELLG    | DLHRL     | --- | T    | SR      | --- | PLEKQ | FIQYFLQIL |
| 499279  | ---VLSKRTY   | EKILKL | --- | HIQH   | E      | N   | ---IISLSDVF  | ISP   | ---    | L      | EDI-YF | ---    | VTELLG    | DLHRL     | --- | T    | SR      | --- | PLEKQ | FIQYFLQIL |
| 898207  | ---VLAKRTY   | EKILKL | --- | HIQH   | E      | N   | ---IISLSDVF  | IAP   | ---    | L      | EDI-YF | ---    | VTELLG    | DLHRL     | --- | T    | SR      | --- | PLEKQ | FIQYFLQIL |
| 500359  | ---VLAKRTY   | EKILKL | --- | HIQH   | E      | N   | ---IISLSDVF  | ISP   | ---    | L      | EDI-YF | ---    | VTELLG    | DLHRL     | --- | T    | SR      | --- | PLEKQ | FIQYFLQIL |
| 390416  | ---VLSKRTY   | EKILKL | --- | HITH   | E      | N   | ---IISLSDVF  | ISP   | ---    | L      | EDI-YF | ---    | VTELLG    | DLHRL     | --- | T    | SR      | --- | PLEKQ | FIQYFLQIL |
| 61586   | ---VLSKRTY   | EKILKL | --- | HIQH   | E      | N   | ---IISLSDVF  | ISP   | ---    | L      | EDI-YF | ---    | VTELLG    | DLHRL     | --- | T    | SR      | --- | PLEKQ | FIQYFLQIL |
| 74488   | ---VLSKRTY   | EKILKL | --- | HITH   | E      | N   | ---IISLSDVF  | ISP   | ---    | L      | EDI-YF | ---    | VTELLG    | DLHRL     | --- | T    | SR      | --- | PLEKQ | FIQYFLQIL |
| 155373  | ---VLSKRTY   | EKILKL | --- | HLKH   | E      | N   | ---IISLSDIF  | ISP   | ---    | L      | EDI-YF | ---    | VTELLG    | DLHRL     | --- | T    | SR      | --- | PLEKQ | FIQYFLQIL |
| 56185   | ---VLAKRTY   | EKILKL | --- | HIQH   | E      | N   | ---IISLSDIF  | ISP   | ---    | L      | EDI-YF | ---    | VTELLG    | DLHRL     | --- | T    | SR      | --- | PLEKQ | FIQYFLQIL |
| 14909   | ---VLAKRTY   | EKILKL | --- | HIQH   | E      | N   | ---IISLSDIF  | ISP   | ---    | L      | EDI-YF | ---    | VTELLG    | DLHRL     | --- | T    | SR      | --- | PLEKQ | FIQYFLQIL |
| 176707  | ---VLSKRTY   | EKILKL | --- | HIQH   | E      | N   | ---IISLSDVF  | ISP   | ---    | L      | EDI-YF | ---    | VTELLG    | DLHRL     | --- | T    | SR      | --- | PLEKQ | FIQYFLQIL |
| 176721  | ---VLSKRTY   | EKILKL | --- | HIQH   | E      | N   | ---IISLSDVF  | ISP   | ---    | L      | EDI-YF | ---    | VTELLG    | DLHRL     | --- | T    | SR      | --- | PLEKQ | FIQYFLQIL |
| 240717  | ---VLSKRTY   | EKILKL | --- | HIQH   | E      | N   | ---IISLSDVF  | ISP   | ---    | L      | EDI-YF | ---    | VTELLG    | DLHRL     | --- | T    | SR      | --- | PLEKQ | FIQYFLQIL |
| 56428   | ---VLSKRTY   | EKILKL | --- | HLRH   | E      | N   | ---VISSDIF   | ISP   | ---    | L      | EDI-YF | ---    | VTELLG    | DLHRL     | --- | T    | SR      | --- | PLEKQ | FIQYFLQIL |
| 87915   | ---VLSKRTY   | EKILKL | --- | HLRH   | E      | N   | ---VISSDIF   | ISP   | ---    | L      | EDI-YF | ---    | VTELLG    | DLHRL     | --- | T    | SR      | --- | PLEKQ | FIQYFLQIL |
| 707387  | ---VLSKRTY   | EKILKL | --- | HLRH   | E      | N   | ---VILSDIF   | ISP   | ---    | L      | EDI-YF | ---    | VTELLG    | DLHRL     | --- | T    | SR      | --- | PLEKQ | FIQYFLQIL |
| 504013  | ---VLSKRTY   | EKILKL | --- | HLKH   | E      | N   | ---VILSDIF   | ISP   | ---    | L      | EDI-YF | ---    | VTELLG    | DLHRL     | --- | T    | SR      | --- | PLEKQ | FIQYFLQIL |
| 37843   | ---VLSKRTY   | EKILKL | --- | HLRH   | E      | N   | ---VILSDIF   | ISP   | ---    | L      | EDI-YF | ---    | VTELLG    | DLHRL     | --- | T    | SR      | --- | PLEKQ | FIQYFLQIL |
| 507853  | ---VLSKRTY   | EKILKL | --- | HLRH   | E      | N   | ---VILSDIF   | ISP   | ---    | L      | EDI-YF | ---    | VTELLG    | DLHRL     | --- | T    | SR      | --- | PLEKQ | FIQYFLQIL |
| 338747  | ---VLSKRTY   | EKILKL | --- | HLRH   | E      | N   | ---IISLSDIF  | ISP   | ---    | L      | EDI-YF | ---    | VTELLG    | DLHRL     | --- | T    | SR      | --- | PLEKQ | FIQYFLQIL |
| 49060   | ---VLSKRTY   | EKILKL | --- | HLKH   | E      | N   | ---VILSDIF   | ISP   | ---    | L      | EDI-YF | ---    | VTELLG    | DLHRL     | --- | T    | SR      | --- | PLEKQ | FIQYFLQIL |
| 147551  | ---VLSKRTY   | EKILKL | --- | HLKH   | E      | N   | ---VILSDIF   | ISP   | ---    | L      | EDI-YF | ---    | VTELLG    | DLHRL     | --- | T    | SR      | --- | PLEKQ | FIQYFLQIL |
| 286873  | ---VLSKRTY   | EKILKL | --- | HLRH   | E      | N   | ---VILSDIF   | ISP   | ---    | L      | EDM-VV | ---    | VTELLG    | DLHRL     | --- | T    | SR      | --- | PLEKQ | FIQYFLQIL |
| 193904  | ---VLAKRTY   | EKILKL | --- | HLKH   | E      | N   | ---VILSDIF   | ISP   | ---    | L      | EDI-YF | ---    | VTELLG    | DLHRL     | --- | T    | SR      | --- | PLEKQ | FIQYFLQIL |
| 189288  | ---VLSKRTY   | EKILKL | --- | HLRH   | E      | N   | ---IISLSDIF  | ISP   | ---    | L      | EDI-YF | ---    | VTELLG    | DLHRL     | --- | T    | SR      | --- | PLEKQ | FIQYFLQIL |
| 198339  | ---VLSKRTY   | EKILKL | --- | HLRH   | E      | N   | ---IISLSDIF  | ISP   | ---    | L      | EDI-YF | ---    | VTELLG    | DLHRL     | --- | T    | SR      | --- | PLEKQ | FIQYFLQIL |
| 2140409 | ---VLAKRTY   | EKILKL | --- | HLKH   | E      | N   | ---VILSDIF   | ISP   | ---    | L      | EDI-YF | ---    | VTELLG    | DLHRL     | --- | T    | SR      | --- | PLEKQ | FIQYFLQIM |
| 642177  | ---VLAKRTY   | EKILKL | --- | HLKH   | E      | N   | ---VILSDIF   | ISP   | ---    | L      | EDI-YF | ---    | VTELLG    | DLHRL     | --- | T    | SR      | --- | PLEKQ | FIQYFLQIM |
| 498471  | ---VLAKRTY   | EKILKL | --- | HLKH   | E      | N   | ---VILSDIF   | ISP   | ---    | L      | EDI-YF | ---    | VTELLG    | DLHRL     | --- | T    | SR      | --- | PLEKQ | FIQYFLQIM |
| 784216  | ---VLAKRTY   | EKILKL | --- | HLKH   | E      | N   | ---VILSDIF   | ISP   | ---    | L      | EDI-YF | ---    | VTELLG    | DLHRL     | --- | T    | SR      | --- | PLEKQ | FIQYFLQIM |
| 128268  | ---VLAKRTY   | EKILKL | --- | HLRH   | E      | N   | ---VILSDIF   | ISP   | ---    | L      | EDI-YF | ---    | VTELLG    | DLHRL     | --- | T    | SR      | --- | PLEKQ | FIQYFLQIM |
| 246689  | ---VLAKRTY   | EKILKL | --- | HLRH   | E      | N   | ---IISLSDIF  | ISP   | ---    | L      | EDI-YF | ---    | VTELLG    | DLHRL     | --- | T    | SR      | --- | PLEKQ | FIQYFLQIM |
| 1081594 | ---VLAKRTY   | EKILKL | --- | HLRH   | E      | N   | ---VILSDIF   | ISP   | ---    | L      | EDI-YF | ---    | VTELLG    | DLHRL     | --- | T    | SR      | --- | PLEKQ | FIQYFLQIM |
| 603877  | ---VLSKRTY   | EKILKL | --- | HLKH   | E      | N   | ---VILSDIF   | ISP   | ---    | L      | EDI-YF | ---    | VTELLG    | DLHRL     | --- | T    | SR      | --- | PLEKQ | FIQYFLQIL |
| 140829  | ---VLSKRTY   | EKILKL | --- | HLKH   | E      | N   | ---VILSDIF   | ISP   | ---    | L      | EDI-YF | ---    | VTELLG    | DLHRL     | --- | T    | SR      | --- | PLEKQ | FIQYFLQIL |
| 327101  | ---VLSKRTY   | EKILKL | --- | HLRH   | E      | N   | ---IISLSDIF  | ISP   | ---    | L      | EDI-YF | ---    | VTELLG    | DLHRL     | --- | T    | SR      | --- | PLEKQ | FIQYFLQIL |
| 329694  | ---VLSKRTY   | EKILKL | --- | HLRH   | E      | N   | ---IISLSDIF  | ISP   | ---    | L      | EDI-YF | ---    | VTELLG    | DLHRL     | --- | T    | SR      | --- | PLEKQ | FIQYFLQIL |
| 393439  | ---VLSKRTY   | EKILKL | --- | HLRH   | E      | N   | ---IISLSDIF  | ISP   | ---    | L      | EDI-YF | ---    | VTELLG    | DLHRL     | --- | T    | SR      | --- | PLEKQ | FIQYFLQIL |
| 38942   | ---VLAKRTY   | EKILKL | --- | HLRH   | E      | N   | ---VIISLSDIF | ISP   | ---    | L      | EDI-YF | ---    | VTELLG    | DLHRL     | --- | T    | SR      | --- | PLEKQ | FIQYFLQIL |
| 87588   | ---VLSKRTY   | EKILKL | --- | HIQH   | E      | N   | ---IISLSDIF  | ISP   | ---    | L      | EDI-YF | ---    | VTELLG    | DLHRL     | --- | T    | SR      | --- | PLEKQ | FIQYFLQIL |
| 443298  | ---VLAKRTY   | EKILKL | --- | HLRH   | E      | N   | ---VILSDIF   | ISP   | ---    | L      | EDI-YF | ---    | VTELLG    | DLHRL     | --- | T    | SR      | --- | PLEKQ | FIQYFLQIM |
| 53587   | ---VLSKRTY   | EKILKL | --- | HLKH   | E      | N   | ---VILSDIF   | ISP   | ---    | L      | EDI-YF | ---    | VTELLG    | DLHRL     | --- | T    | SR      | --- | PLEKQ | FIQYFLQIL |
| 70072   | ---VLAKRTY   | EKILKL | --- | HIRH   | E      | N   | ---IISLSDIF  | ISP   | ---    | L      | EDI-YF | ---    | VTELLG    | DLHRL     | --- | T    | SR      | --- | PLEKQ | FIQYFLQIL |
| 13822   | ---VLSKRTY   | EKILKL | --- | HIQH   | E      | N   | ---VILSDIF   | ISP   | ---    | L      | EDI-YF | ---    | VTELLG    | DLHRL     | --- | T    | SR      | --- | PLEKQ | FIQYFLQIL |
| 25364   | ---VIISLSDIF | ISP    | --- | L      | EDI-YF | --- | VTELLG       | DLHRL | ---    | T      | SR     | ---    | PLEKQ     | FIQYFLQIL | --- |      |         |     |       |           |
| 116576  | ---VLSKRTY   | EKILKL | --- | HLRH   | E      | N   | ---IISLSDIF  | ISP   | ---    | L      | EDI-YF | ---    | VTELLG    | DLHRL     | --- | T    | SR      | --- | PLEKQ | FIQYFLQIL |
| 103311  | ---LITLDDIF  | LSP    | --- | L      | EDI-YF | --- | VTELLG       | DLHRL | ---    | T      | SR     | ---    | PLEKQ     | FIQYFLQIL | --- |      |         |     |       |           |
| 26173   | ---VLAKRTY   | EKILKL | --- | HLKH   | E      | N   | ---LITLDDIF  | LSP   | ---    | L      | EDI-YF | ---    | VNELQG    | DLHRL     | --- | T    | SR      | --- | PLEKQ | FIQYFLQIL |
| 55352   | ---VLAKRTY   | EKILKL | --- | HLKH   | E      | N   | ---LITLDDIF  | LSP   | ---    | L      | EDI-YF | ---    | VNELQG    | DLHRL     | --- | T    | SR      | --- | PLEKQ | FIQYFLQIL |
| 125207  | ---VLAKRTY   | EKILKL | --- | HLRH   | E      | N   | ---LITLDDIF  | LSP   | ---    | L      | EDI-YF | ---    | VTELLG    | DLHRL     | --- | T    | SR      | --- | PLEKQ | FIQYFLQIL |
| 67307   | ---LITLDDIF  | LSP    | --- | L      | EDI-YF | --- | VTELLG       | DLHRL | ---    | T      | SR     |        |           |           |     |      |         |     |       |           |





Main alignment table with columns for sequence identifiers, alignment characters (dash, numbers, letters), and sequence names. Includes various protein sequences like 139503, 2468658, etc.

Summary table for alignment statistics, including columns for sequence identifiers, alignment characters, and sequence names. Includes various protein sequences like 127228, 287090, etc.









|         |  |            |            |        |       |            |           |         |          |          |      |    |          |           |          |          |           |
|---------|--|------------|------------|--------|-------|------------|-----------|---------|----------|----------|------|----|----------|-----------|----------|----------|-----------|
| 35549   |  | -RGLKYVHSA | GVHRDL     |        | -KP-S | NLLINENC   | K         |         | -ICDFGLA | R        |      | -I | QDPQMTGV | TRYRAPEM  | LWQKYVDV |          |           |
| 230139  |  | -RGLKYVHSA | GVHRDL     |        | -KP-S | NLLINENC   | K         |         | -ICDFGLA | R        |      | -I | QDPQMTGV | TRYRAPEM  | LWQKYVDV |          |           |
| 193325  |  | -RGLKYVHSA | GVHRDL     |        | -KP-S | NLLINENC   | K         |         | -ICDFGLA | R        |      | -I | QDPQMTGV | TRYRAPEM  | LWQKYVDV |          |           |
| 430049  |  | -RGLKYVHSA | GVHRDL     |        | -KP-S | NLLINENC   | K         |         | -ICDFGLA | R        |      | -I | QDPQMTGV | TRYRAPEM  | LWQKYVDV |          |           |
| 479652  |  | -RGLKYVHSA | GVHRDL     |        | -KP-S | NLLINENC   | K         |         | -ICDFGLA | R        |      | -I | QDPQMTGV | TRYRAPEM  | LWQKYVDV |          |           |
| 986652  |  | -RGLKYVHSA | GVHRDL     |        | -KP-S | NLLVNCNDL  | K         |         | -ICDFGLA | R        |      | -I | QDPQMTGV | TRYRAPEM  | LWQKYVDV |          |           |
| 295607  |  | -RGLKYVHSA | GVHRDL     |        | -KP-S | NLLVNCNDL  | K         |         | -ICDFGLA | R        |      | -I | QDPQMTGV | TRYRAPEM  | LWQKYVDV |          |           |
| 114099  |  | -RGLKYVHSA | GVHRDL     |        | -KP-S | NLLVNCNDL  | K         |         | -ICDFGLA | R        |      | -I | QDPQMTGV | TRYRAPEM  | LWQKYVDV |          |           |
| 265170  |  | -RGLKYVHSA | GVHRDL     |        | -KP-S | NLLINENC   | K         |         | -ICDFGLA | R        |      | -I | QDPQMTGV | TRYRAPEM  | LWQKYVDV |          |           |
| 41804   |  | -RGLKYVHSA | GVHRDL     |        | -KP-S | NLLINENC   | K         |         | -ICDFGLA | R        |      | -I | QDPQMTGV | TRYRAPEM  | LWQKYVDV |          |           |
| 500846  |  | -RGLKYVHSA | GVHRDL     |        | -KP-S | NLLVNCNDL  | K         |         | -ICDFGLA | R        |      | -I | QDPQMTGV | TRYRAPEM  | LWQKYVDV |          |           |
| 341622  |  | -RGLKYVHSA | GVHRDL     |        | -KP-S | NLLVNCNDL  | K         |         | -ICDFGLA | R        |      | -I | QDPQMTGV | TRYRAPEM  | LWQKYVDV |          |           |
| 1545705 |  | -RGLKYVHSA | GVHRDL     |        | -KP-S | NLLINENC   | K         |         | -ICDFGLA | R        |      | -I | QDPQMTGV | TRYRAPEM  | LWQKYVDV |          |           |
| 15276   |  | -RGLKYVHSA | GVHRDL     |        | -KP-S | NLLINENC   | K         |         | -ICDFGLA | R        |      | -I | QDPQMTGV | TRYRAPEM  | LWQKYVDV |          |           |
| 391543  |  | -RGLKYVHSA | GVHRDL     |        | -KP-S | NLLINENC   | K         |         | -ICDFGLA | R        |      | -V | QEHNM    | TRYRAPEM  | LWTRKYNR |          |           |
| 346451  |  | -RGLKYVHSA | GVHRDL     |        | -KP-S | NLLINENC   | K         |         | -ICDFGLA | R        |      | -V | QEHNM    | TRYRAPEM  | LWTRKYNR |          |           |
| 449365  |  | -RGLKYVHSA | GVHRDL     |        | -KP-S | NLLVNCNDL  | K         |         | -ICDFGLA | R        |      | -V | QELQMT   | TRYRAPEM  | LWTRRYNE |          |           |
| 54661   |  | -RGLKYVHSA | GVHRDL     |        | -KP-S | NLLINENC   | K         |         | -ICDFGLA | R        |      | -I | QDPQMTGV | TRYRAPEM  | LWQKYVDV |          |           |
| 275309  |  | -RGMKYVHSA | GLIHRDL    |        | -KP-E | QDAQMT     | TRYRAPEM  | LWQKYTY |          |          |      | -E | QDPQMTGV | TRYRAPEM  | LWQKYTY  |          |           |
| 389883  |  | -RGLKYVHSA | GVHRDL     |        | -KP-S | NLLINDNCDL | K         |         | -ICDFGLA | R        |      | -E | QDYQMT   | TRYRAPEM  | LWQKYTH  |          |           |
| 61624   |  | -RGLKYVHSA | GVHRDL     |        | -KP-S | NLLINRNCV  | K         |         | -ICDFGLA | R        |      | -I | QDFBMT   | TRYRAPEM  | LWGNVGP  |          |           |
| 173235  |  | -RGLKYVHSA | GVHRDL     |        | -KP-S | NLLINRNCV  | K         |         | -ICDFGLA | R        |      | -I | QDFBMT   | TRYRAPEM  | LWGNVGP  |          |           |
| 35612   |  | -RGLKYVHSA | GVHRDL     |        | -KP-S | NLLINENC   | K         |         | -ICDFGLA | R        |      | -I | QDPQMTGV | TRYRAPEM  | LWQKYVDV |          |           |
| 35597   |  | -RGLKYVHSA | GVHRDL     |        | -KP-S | NLLINENC   | K         |         | -ICDFGLA | R        |      | -I | QDPQMTGV | TRYRAPEM  | LWQKYVDV |          |           |
| 391476  |  | -RGLKYVHSA | GVHRDL     |        | -KP-S | NVLVNCNDI  | K         |         | -LCDFGLA | R        |      | -T | VDTTMT   | MRHYRAPET | LWQKYTV  |          |           |
| 335269  |  | -RGLKYVHSA | GVHRDL     |        | -KP-S | NVLVNCNDI  | K         |         | -LCDFGLA | R        |      | -T | VDTTMT   | MRHYRAPET | LWQKYTV  |          |           |
| 377162  |  | -RGLKYVHSA | GVHRDL     |        | -KP-S | NVLVNCNDI  | K         |         | -LCDFGLA | R        |      | -T | VDTTMT   | MRHYRAPET | LWQKYTV  |          |           |
| 271149  |  | -RGLKYVHSA | GVHRDL     |        | -KP-S | NLLVNCNDL  | K         |         | -ICDFGLA | R        |      | -I | QDPQMTGV | TRYRAPEM  | LWQKYVDV |          |           |
| 89784   |  | -RGLKYVHSA | GVHRDL     |        | -KP-S | NLLINENC   | K         |         | -ICDFGLA | R        |      | -I | QDPQMTGV | TRYRAPEM  | LWQKYVDV |          |           |
| 114108  |  | --SAHLP    | EAHVPTL    |        | -S-L  | PDPLNENC   | K         |         | -ICDFGLA | R        |      | -I | QDPQMTGV | TRYRAPEM  | LWQKYVDV |          |           |
| 173207  |  | -M         | LSGLQYTHAA | NVHRDL |       | -KP-A      | NLLVNCNDI | R       |          | -ICDFGMA | REYR |    | -A       | QDGR      | QSAFLTEV | TRYRAPEM | ISPNNYSK  |
| 127887  |  | -L         | FSGLKYVHSA | NVHRDL |       | -KP-A      | NLLVNCNDI | R       |          | -ICDFGMA | REYR |    | -S       | QSSQL     | EAMNTHV  | TRYRAPEM | LSPTYDKA  |
| 29226   |  | -I         | LSGLKYVHSA | NVHRDL |       | -KP-A      | NLLVNCNDI | R       |          | -ICDFGMA | REYR |    | -E       | QSSQL     | ETPSMTHV | TRYRAPEM | MSRNYDKA  |
| 167765  |  | -I         | FSGLKYVHSA | NVHRDL |       | -KP-A      | NLLVNCNDI | R       |          | -ICDFGMA | RGFA |    | -R       | RSNAQI    | ESQYMHV  | TRYRAPEM | LSBKTYDKP |
| 150384  |  | -I         | FSGLKYVHSA | NVHRDL |       | -KP-A      | NLLVNCNDI | R       |          | -ICDFGMA | RGFA |    | -R       | RSNAQI    | ESQYMHV  | TRYRAPEM | LSBKTYDKP |
| 57923   |  | -L         | FSGLKYVHSA | NVHRDL |       | -KP-A      | NLLVNCNDI | R       |          | -ICDFGMA | RGIA |    | -R       | KPSAKV    | ELQNMTHV | TRYRAPEM | LSRNSYDKA |
| 57928   |  | -L         | FSGLKYVHSA | NVHRDL |       | -KP-A      | NLLVNCNDI | R       |          | -ICDFGMA | RGIA |    | -R       | KPSAKV    | ELQNMTHV | TRYRAPEM | LSRNSYDKA |
| 230955  |  | -I         | LTGLKYVHSA | DVHRDL |       | -KP-A      | NLLVNCNDI | R       |          | -ICDFGMA | RGHI |    | -R       | DDQNY     | ESWNLQV  | TRYRAPEM | LSRNSYDKA |
| 172033  |  | -I         | LTGLKYVHSA | DVHRDL |       | -KP-A      | NLLVNCNDI | R       |          | -ICDFGMA | RGHI |    | -R       | DDQNY     | ESWNLQV  | TRYRAPEM | LSRNSYDKA |
| 40306   |  | -I         | LCGLKYVHSA | NVHRDL |       | -KP-G      | NLLVNCNDI | R       |          | -ICDFGLA | RGFS |    | -R       | ADPAE     | NAGFTEV  | TRYRAPEM | LSFSQYTKA |
| 693957  |  | -I         | LCGLKYVHSA | NVHRDL |       | -KP-G      | NLLVNCNDI | R       |          | -ICDFGLA | RGFS |    | -R       | ADPAE     | NAGFTEV  | TRYRAPEM | LSFSQYTKA |
| 508525  |  | -I         | LCGLKYVHSA | NVHRDL |       | -KP-G      | NLLVNCNDI | R       |          | -ICDFGLA | RGFS |    | -R       | ADPAE     | NAGFTEV  | TRYRAPEM | LSFSQYTKA |
| 471145  |  | -I         | LCGLKYVHSA | NVHRDL |       | -KP-G      | NLLVNCNDI | R       |          | -ICDFGLA | RGFS |    | -R       | ADPAE     | NAGFTEV  | TRYRAPEM | LSFSQYTKA |
| 480536  |  | -I         | LCGLKYVHSA | NVHRDL |       | -KP-G      | NLLVNCNDI | R       |          | -ICDFGLA | RGFS |    | -R       | ADPAE     | NAGFTEV  | TRYRAPEM | LSFSQYTKA |
| 471745  |  | -I         | LCGLKYVHSA | NVHRDL |       | -KP-G      | NLLVNCNDI | R       |          | -ICDFGLA | RGFS |    | -R       | ADPAE     | NAGFTEV  | TRYRAPEM | LSFSQYTKA |
| 687176  |  | -I         | LCGLKYVHSA | NVHRDL |       | -KP-G      | NLLVNCNDI | R       |          | -ICDFGLA | RGFS |    | -R       | ADPAE     | NAGFTEV  | TRYRAPEM | LSFSQYTKA |
| 34863   |  | -I         | LCGLKYVHSA | NVHRDL |       | -KP-G      | NLLVNCNDI | R       |          | -ICDFGLA | RGFS |    | -R       | ADPAE     | NAGFTEV  | TRYRAPEM | LSFSQYTKA |
| 57153   |  | -I         | LCGLKYVHSA | NVHRDL |       | -KP-G      | NLLVNCNDI | R       |          | -ICDFGLA | RGFS |    | -R       | ADPAE     | NAGFTEV  | TRYRAPEM | LSFSQYTKA |
| 147961  |  | -I         | LCGLKYVHSA | NVHRDL |       | -KP-G      | NLLVNCNDI | R       |          | -ICDFGLA | RGFS |    | -R       | ADPAE     | NAGFTEV  | TRYRAPEM | LSFSQYTKA |
| 287354  |  | -I         | LCGLKYVHSA | NVHRDL |       | -KP-G      | NLLVNCNDI | R       |          | -ICDFGLA | RGFS |    | -R       | ADPAE     | NAGFTEV  | TRYRAPEM | LSFSQYTKA |
| 281614  |  | -I         | LCGLKYVHSA | NVHRDL |       | -KP-G      | NLLVNCNDI | R       |          | -ICDFGLA | RGFS |    | -R       | ADPAE     | NAGFTEV  | TRYRAPEM | LSFSQYTKA |
| 29684   |  | -I         | LCGLKYVHSA | NVHRDL |       | -KP-G      | NLLVNCNDI | R       |          | -ICDFGLA | RGFS |    | -R       | ADPAE     | NAGFTEV  | TRYRAPEM | LSFSQYTKA |
| 144400  |  | -I         | LCGLKYVHSA | NVHRDL |       | -KP-G      | NLLVNCNDI | R       |          | -ICDFGLA | RGFS |    | -R       | ADPAE     | NAGFTEV  | TRYRAPEM | LSFSQYTKA |
| 136175  |  | -I         | LCGLKYVHSA | NVHRDL |       | -KP-G      | NLLVNCNDI | R       |          | -ICDFGLA | RGFS |    | -R       | ADPAE     | NAGFTEV  | TRYRAPEM | LSFSQYTKA |
| 126818  |  | -I         | LCGLKYVHSA | NVHRDL |       | -KP-G      | NLLVNCNDI | R       |          | -ICDFGLA | RGFS |    | -R       | ADPAE     | NAGFTEV  | TRYRAPEM | LSFSQYTKA |
| 213868  |  | -I         | LCGLKYVHSA | NVHRDL |       | -KP-G      | NLLVNCNDI | R       |          | -ICDFGLA | RGFS |    | -R       | ADPAE     | NAGFTEV  | TRYRAPEM | LSFSQYTKA |
| 48096   |  | -I         | LCGLKYVHSA | NVHRDL |       | -KP-G      | NLLVNCNDI | R       |          | -ICDFGLA | RGFS |    | -R       | ADPAE     | NAGFTEV  | TRYRAPEM | LSFSQYTKA |
| 179022  |  | -I         | LCGLKYVHSA | NVHRDL |       | -KP-G      | NLLVNCNDI | R       |          | -ICDFGLA | RGFS |    | -R       | ADPAE     | NAGFTEV  | TRYRAPEM | LSFSQYTKA |
| 778216  |  | -I         | LCGLKYVHSA | NVHRDL |       | -KP-G      | NLLVNCNDI | R       |          | -ICDFGLA | RGFS |    | -R       | ADPAE     | NAGFTEV  | TRYRAPEM | LSFSQYTKA |
| 665500  |  | -I         | LCGLKYVHSA | NVHRDL |       | -KP-G      | NLLVNCNDI | R       |          | -ICDFGLA | RGFS |    | -R       | ADPAE     | NAGFTEV  | TRYRAPEM | LSFSQYTKA |
| 190738  |  | -I         | LCGLKYVHSA | NVHRDL |       | -KP-G      | NLLVNCNDI | R       |          | -ICDFGLA | RGFS |    | -R       | ADPAE     | NAGFTEV  | TRYRAPEM | LSFSQYTKA |
| 1107049 |  | -I         | LCGLKYVHSA | NVHRDL |       | -KP-G      | NLLVNCNDI | R       |          | -ICDFGLA | RGFS |    | -R       | ADPAE     | NAGFTEV  | TRYRAPEM | LSFSQYTKA |
| 504269  |  | -I         | LCGLKYVHSA | NVHRDL |       | -KP-G      | NLLVNCNDI | R       |          | -ICDFGLA | RGFS |    | -R       | ADPAE     | NAGFTEV  | TRYRAPEM | LSFSQYTKA |
| 432134  |  | -I         | LCGLKYVHSA | NVHRDL |       | -KP-G      | NLLVNCNDI | R       |          | -ICDFGLA | RGFS |    | -R       | ADPAE     | NAGFTEV  | TRYRAPEM | LSFSQYTKA |
| 59068   |  | -I         | LCGLKYVHSA | NVHRDL |       | -KP-G      | NLLVNCNDI | R       |          | -ICDFGLA | RGFS |    | -R       | ADPAE     | NAGFTEV  | TRYRAPEM | LSFSQYTKA |
| 336185  |  | -I         | LCGLKYVHSA | NVHRDL |       | -KP-G      | NLLVNCNDI | R       |          | -ICDFGLA | RGFS |    | -R       | ADPAE     | NAGFTEV  | TRYRAPEM | LSFSQYTKA |
| 343155  |  | -I         | LCGLKYVHSA | NVHRDL |       | -KP-G      | NLLVNCNDI | R       |          | -ICDFGLA | RGFS |    | -R       | ADPAE     | NAGFTEV  | TRYRAPEM | LSFSQYTKA |
| 326648  |  | -I         | LCGLKYVHSA | NVHRDL |       | -KP-G      | NLLVNCNDI | R       |          | -ICDFGLA | RGFS |    | -R       | ADPAE     | NAGFTEV  | TRYRAPEM | LSFSQYTKA |
| 425863  |  | -I         | LCGLKYVHSA | NVHRDL |       | -KP-G      | NLLVNCNDI | R       |          | -ICDFGLA | RGFS |    | -R       | ADPAE     | NAGFTEV  | TRYRAPEM | LSFSQYTKA |
| 436998  |  | -I         | LCGLKYVHSA | NVHRDL |       | -KP-G      | NLLVNCNDI | R       |          | -ICDFGLA | RGFS |    | -R       | ADPAE     | NAGFTEV  | TRYRAPEM | LSFSQYTKA |
| 257317  |  | -I         | LCGLKYVHSA | NVHRDL |       | -KP-G      | NLLVNCNDI | R       |          | -ICDFGLA | RGFS |    | -R       | ADPAE     | NAGFTEV  | TRYRAPEM | LSFSQYTKA |
| 998070  |  | -I         | LCGLKYVHSA | NVHRDL |       | -KP-G      | NLLVNCNDI | R       |          | -ICDFGLA | RGFS |    | -R       | ADPAE     | NAGFTEV  | TRYRAPEM | LSFSQYTKA |
| 49449   |  | -I         | LCGLKYVHSA | NVHRDL |       | -KP-G      | NLLVNCNDI | R       |          | -ICDFGLA | RGFS |    | -R       | ADPAE     | NAGFTEV  | TRYRAPEM | LSFSQYTKA |
| 498377  |  | -I         | LCGLKYVHSA | NVHRDL |       | -KP-G      | NLLVNCNDI | R       |          | -ICDFGLA | RGFS |    | -R       | ADPAE     | NAGFTEV  | TRYRAPEM | LSFSQYTKA |
| 184715  |  | -I         | LCGLKYVHSA | NVHRDL |       | -KP-G      | NLLVNCNDI | R       |          | -ICDFGLA | RGFS |    | -R       | ADPAE     | NAGFTEV  | TRYRAPEM | LSFSQYTKA |
| 51223   |  | -I         | LCGLKYVHSA | NVHRDL |       | -KP-G      | NLLVNCNDI | R       |          | -ICDFGLA | RGFS |    | -R       | ADPAE     | NAGFTEV  | TRYRAPEM | LSFSQYTKA |
| 66669   |  | -I         | LCGLKYVHSA | NVHRDL |       | -KP-G      | NLLVNCNDI | R       |          | -ICDFGLA | RGFS |    | -R       | ADPAE     | NAGFTEV  | TRYRAPEM | LSFSQYTKA |
| 649898  |  | -I         | LCGLKYVHSA | NVHRDL |       | -KP-G      | NLLVNCNDI | R       |          | -ICDFGLA | RGFS |    | -R       | ADPAE     | NAGFTEV  | TRYRAPEM | LSFSQYTKA |
| 253828  |  | -I         | LCGLKYVHSA | NVHRDL |       | -KP-G      | NLLVNCNDI | R       |          | -ICDFGLA | RGFS |    | -R       | ADPAE     | NAGFTEV  | TRYRAPEM | LSFSQYTKA |
| 618068  |  | -I         | LCGLKYVHSA | NVHRDL |       | -KP-G      | NLLVNCNDI | R       |          | -ICDFGLA | RGFS |    | -R       | ADPAE     | NAGFTEV  | TRYRAPEM | LSFSQYTKA |
| 108847  |  | -I         | LCGLKYVHSA | DVHRDL |       | -KP-G      | NLLVNCNDI |         |          |          |      |    |          |           |          |          |           |

|         |        |            |         |      |      |            |            |      |         |            |           |            |            |            |            |            |            |           |
|---------|--------|------------|---------|------|------|------------|------------|------|---------|------------|-----------|------------|------------|------------|------------|------------|------------|-----------|
| 53954   | -----T | LCGLKYTHSA | HVLRHDL | ---- | KP-G | NLLVNADEL  | K          | ---- | ICDFGLA | RGFD       | ----      | QAATDQQNN  | QQGFMEYVA  | TRWYRAPEIM | LSFANYTTA  |            |            |           |
| 1446322 | -----T | RSQPL      | ----    | SDA  | ---- | HF-Q       | SFLYQTLCLG | K    | ----    | ICDFGLA    | RGYAPGPGG | TASANQKAA  | NOGFMEYVA  | TRWYRAPEIM | LSFANYTTA  |            |            |           |
| 351754  | -----T | LCGLKYTHSA | NVLRHDL | ---- | KP-G | NLLVNADEL  | K          | ---- | ICDFGLA | RGYQPG-GNG | ----      | KASGG      | ----AP     | NOGFMEYVA  | TRWYRAPEIM | LSFANYTTA  |            |           |
| 65873   | -----T | LCGLKYTHSA | DVIHRDL | ---- | KP-G | NLLVNADEL  | K          | ---- | ICDFGLA | RGFE       | ----      | SDPLRAGLAG | SAGPMEYVA  | TRWYRAPEIM | LSFANYSTS  |            |            |           |
| 52469   | -----T | LCGLKYTHSA | DVIHRDL | ---- | KP-G | NLL        | ----       | ---- | ICDFGLA | RGFE       | ----      | SDPLRAGLAG | SAGPMEYVA  | TRWYRAPEIM | LSFANYSTS  |            |            |           |
| 30002   | -----T | LCGLKYTHSA | DVIHRDL | ---- | KP-G | NLLVNADEL  | K          | ---- | ICDFGLA | RGFE       | ----      | SDPLRAGLAG | SAGPMEYVA  | TRWYRAPEIM | LSFANYSTS  |            |            |           |
| 154156  | -----A | CCGLKYTHSA | NVLRHDL | ---- | KP-C | NLLVNTKCEL | K          | ---- | ICDFGLA | RGYV       | ----      | DAKGGQEG   | DVGFMEYVA  | TRWYRAPEIM | LSFRSYTKA  |            |            |           |
| 166841  | -----A | CCGLKYTHSA | NVLRHDL | ---- | KP-C | NLLVNTKCEL | K          | ---- | ICDFGLA | RGYV       | ----      | DAKGGQEG   | DVGFMEYVA  | TRWYRAPEIM | LSFR       |            |            |           |
| 238118  | -----A | CCGLKYTHSA | NVLRHDL | ---- | KP-S | NLLVNTKCEL | K          | ---- | ICDFGLA | RGYI       | ----      | DFSSGGT    | DAGPMEYVA  | TRWYRAPEIM | LGFSYTKA   |            |            |           |
| 143069  | -----A | CCGLKYTHSA | NVLRHDL | ---- | KP-S | NLLVNTKCEL | K          | ---- | ICDFGLA | RGYI       | ----      | DFSSGGT    | DAGPMEYVA  | TRWYRAPEIM | LGFSYTKA   |            |            |           |
| 456095  | -----T | LCGLKYTHSA | NVLRHDL | ---- | KP-G | NLLVNADEL  | K          | ---- | ICDFGLA | RGFTP      | ----      | GS         | GA         | ----       | SKSAG      | NOGFMEYVA  | TRWYRAPEIM | LSFANYTTA |
| 175880  | -----T | LCGLKYTHSA | NVLRHDL | ---- | KP-G | NLLVNADEL  | K          | ---- | ICDFGLA | RGYTP      | ----      | AG         | GTAPPKAA   | NOGFMEYVA  | TRWYRAPEIM | LSFANYTTA  |            |           |
| 28309   | -----I | LCALKYTHSA | NVLRHDL | ---- | KP-K | NLLVNSDQCL | K          | ---- | ICNFGLS | CSYS       | ----      | ----       | ENHKV      | NDGPIKGYIT | SIWYKAPILL | LYNQCCTKA  |            |           |
| 767958  | -----I | LCALKYTHSA | NVLRHDL | ---- | KP-K | NLLVNSDQCL | K          | ---- | ICNFGLS | CSYS       | ----      | ----       | ENHKV      | NDGPIKGYIT | SIWYKAPILL | LYNQCCTKA  |            |           |
| 126152  | -----I | LCALKYTHSA | NVLRHDL | ---- | KP-K | NLLVNSDQCL | K          | ---- | ICNFGLS | CSYS       | ----      | ----       | ENHKV      | NDGPIKGYIT | SIWYKAPILL | LYNQCCTKA  |            |           |
| 613191  | -----I | LCGLKYTHSA | NVLRHDL | ---- | KP-G | NLLVNADEL  | K          | ---- | ICDFGLA | RGFS       | ----      | ----       | VDPEE      | NAGYMEYVA  | TRWYRAPEIM | LSFSQYTKA  |            |           |
| 198058  | -----I | LCGLKYTHSA | NVLRHDL | ---- | KP-G | NLLVNADEL  | K          | ---- | ICDFGLA | RGFS       | ----      | ----       | VDPEE      | NAGYMEYVA  | TRWYRAPEIM | LSFSQYTKA  |            |           |
| 123006  | -----I | LCGLKYTHSA | NVLRHDL | ---- | KP-G | NLLVNADEL  | K          | ---- | ICDFGLA | RGFS       | ----      | ----       | IDPEE      | NAGYMEYVA  | TRWYRAPEIM | LSFQNYTKA  |            |           |
| 178993  | -----I | LCGLKYTHSA | NVLRHDL | ---- | KP-G | NLLVNADEL  | K          | ---- | ICDFGLA | RGFS       | ----      | ----       | VDPEE      | NAGYMEYVA  | TRWYRAPEIM | LSFQNYTKA  |            |           |
| 122967  | -----I | LCGLKYTHSA | NVLRHDL | ---- | KP-G | NLLVNADEL  | K          | ---- | ICDFGLA | RGFS       | ----      | ----       | IDPEE      | NAGYMEYVA  | TRWYRAPEIM | LSFQNYTKA  |            |           |
| 120501  | -----I | LCGLKYTHSA | NVLRHDL | ---- | KP-G | NLLVNADEL  | K          | ---- | ICDFGLA | RGFS       | ----      | ----       | VDPEE      | NAGYMEYVA  | TRWYRAPEIM | LSFQNYTKA  |            |           |
| 99018   | -----I | LCGLKYTHSA | NVLRHDL | ---- | KP-G | NLLVNADEL  | K          | ---- | ICDFGLA | RGFS       | ----      | ----       | MDPEE      | NAGYMEYVA  | TRWYRAPEIM | LSFSQYTKA  |            |           |
| 213678  | -----I | LCGLKYTHSA | NVLRHDL | ---- | KP-G | NLLVNADEL  | K          | ---- | ICDFGLA | RGFS       | ----      | ----       | MDPEE      | NAGYMEYVA  | TRWYRAPEIM | LSFSQYTKA  |            |           |
| 460523  | -----I | LCGLKYTHSA | NVLRHDL | ---- | KP-G | NLLVNADEL  | K          | ---- | ICDFGLA | RGFS       | ----      | ----       | MDPEE      | NAGYMEYVA  | TRWYRAPEIM | LSFSQYTKA  |            |           |
| 625621  | -----I | LCGLKYTHSA | NVLRHDL | ---- | KP-G | NLLVNADEL  | K          | ---- | ICDFGLA | RGFS       | ----      | ----       | VDPEE      | NAGYMEYVA  | TRWYRAPEIM | LSFLSYTKA  |            |           |
| 265871  | -----I | LCGLKYTHSA | NVLRHDL | ---- | KP-G | NLLVNADEL  | K          | ---- | ICDFGLA | RGFS       | ----      | ----       | IDPEE      | NAGYMEYVA  | TRWYRAPEIM | LSFSQYTKA  |            |           |
| 53464   | -----I | LCGLKYTHSA | NVLRHDL | ---- | KP-G | NLLVNADEL  | K          | ---- | ICDFGLA | RGFS       | ----      | ----       | IDPEE      | NAGYMEYVA  | TRWYRAPEIM | LSFSQYTKA  |            |           |
| 105414  | -----I | LCGLKYTHSA | NVLRHDL | ---- | KP-G | NLLVNADEL  | K          | ---- | ICDFGLA | RGFS       | ----      | ----       | LDPEE      | NAGYMEYVA  | TRWYRAPEIM | LSFSQYTKA  |            |           |
| 291876  | -----I | LCGLKYTHSA | NVLRHDL | ---- | KP-G | NLLVNADEL  | K          | ---- | ICDFGLA | RGFS       | ----      | ----       | LDPEE      | NAGYMEYVA  | TRWYRAPEIM | LSFSQYTKA  |            |           |
| 50744   | -----I | LCGLKYTHSA | DVLRHDL | ---- | KP-G | NLLVNVCEL  | K          | ---- | ICDFGLA | RGFSED     | ----      | ----       | VEQ        | NSGFMEYVA  | TRWYRAPEIM | LSFSNYTKA  |            |           |
| 863837  | -----I | CRGLKYTHSA | NVLRHDL | ---- | KP-G | NLLVNADEL  | K          | ---- | ICDFGLA | RGFSD      | ----      | ----       | AES        | NVGFMEYVA  | TRWYRAPEIM | LSFSQYTKA  |            |           |
| 81355   | -----T | LCGLKYTHSA | NVLRHDL | ---- | KP-G | NLLVNADEL  | K          | ---- | ICDFGLA | RGYTPGGG   | ----      | ----       | AS         | RAAG       | NOGFMEYVA  | TRWYRAPEIM | LSFANYTTA  |           |
| 152896  | -----T | LCGLKYTHSA | NVLRHDL | ---- | KP-G | NLLVNADEL  | K          | ---- | ICDFGLA | RGYTPGGG   | ----      | ----       | NNNTRGA    | NOGFMEYVA  | TRWYRAPEIM | LSFANYTTA  |            |           |
| 1196002 | -----T | LCGLKYTHSA | NVLRHDL | ---- | KP-G | NLLVNADEL  | K          | ---- | ICDFGLA | RGYAPGPGG  | ----      | ----       | TASANQKAA  | NOGFMEYVA  | TRWYRAPEIM | LSFANYTTA  |            |           |
| 1195972 | -----T | LCGLKYTHSA | NVLRHDL | ---- | KP-G | NLLVNADEL  | K          | ---- | ICDFGLA | RGYAPGPGG  | ----      | ----       | TASANQKAA  | NOGFMEYVA  | TRWYRAPEIM | LSFANYTTA  |            |           |
| 49917   | -----I | LCVARYTHSA | NVLRHDL | ---- | KP-G | NILVNSIGEL | K          | ---- | ICDFGLA | RSYRDS-STR | ----      | ----       | PRSSLTGGSD | EFPKITHYVA | TRWYRAPEIM | MYENYSKA   |            |           |











```

2435698
1222436
1172380 RATTTPVDPVV TYARRSSIMQ PSRQPS-----AVN SPMMNSQQLP TIDG-----LPTMG NSSGIAF
1151825
410058
57461
311323 RPISLLNVAG ISS--FCVEY IALAAS---- SPISPPPT-I PAPCFIPPT FAGMQTYTNP FTPT-----NTSTSP ALVLSKST-- ---WLLLL TAPAPAPAR-
143102 ESLRLSSNQI GVV--LAIAP FVQSVACPVW TILADKKPSW HGPLMAILIA IGGTSVMTLM FLPN-----WLMRD TCANNPSCDP AVTKTDES-- ---STGLIF AAVLALIFA-
2750129 LLARLNAAAA GET--YAPAT GVAAG---- GFVKPTEGE NANAABVKEN AGEAKEKTKK ELKR-----EKKEK KRRKKEQEGE DVEKSKK-- ---KKDQS EGNTPFVA-
2702932 LLARLNAAAA GET--YAPAT GVAAG---- RFTSPFAVSY MRKSLAADKE CQTSLVNFKK NQTA-----FINLV TVIPIGCGQ GLPHEHEVUV YHVGFQVDLN EQNALLDLKL
108010 LTVDESEVUV GRNCRFLQAP NGAATKGEQR RFTSPFAVSY MRKSLAADKE CQTSLVNFKK NQTA-----FINLV TVIPIGCGQ GLPHEHEVUV YHVGFQVDLN EQNALLDLKL
1754091 SWLVSQGVYQ ARGPSI-SP SGRBAVER-- -VLLFLKFK C---VANLGP GPGC-----HYVKM VHGHEQGMQ GIVNETWELI YKC-LHIDL- DTISPPYKKN
564944 RMVEDDDASC YITPANFHEH NETRGRFRK LTARVFDAM YRTADLGLL C---VANLGP GPGC-----HLAEN VRRPYTFAQ --MQSLQVLV ADVUMAVRWM STLISPRVPR-
AtMPK18 RVPSGRGPR VVSSVSYEN ---GRNLKE AYFRSAVSSP HCYFRNTMT NPNENRIEAS SFPP-----KQPNP VHQFSPTEPP AATTNQADVE TMMHNPVYFQ POLKPTID--
AtMPK19 RVP-SGKPCR VVSSVSYEN ---DRNLKE SSYDARTSYV RSTVLPQTV SPNCPYLPNT MNQE-----KRSGT EAASOPKPOF VPTQNSAKA AELNPNFYVQ SQ-----
AtMPK20 RNLSAAKPST FMGPVAPFDN ---GRISRD AYDRPSFI-- RSTNLPFSQO SAATVAMGQK QERR-----TTMEP EKQARQISQY NRYAPDVAIN I-DNNPFIMA RTGMNKA--
OsmPK20-1 QRVPARTGR VVGVPVLYEN ---GA-TKD SYDARLLA-- MNSGYVPOQ IQQAYGYQYI PGKS-----ACSEL SQAERYTLHQ QAYTCANSAT V-TDVALDMR APFPHLSGG-
OsmPK20-4 QRIP-GRTPR GACPVIPFEN ---LS-AMG PYNQRVV-- RNPVLPATT NLSAYAYHRK SDSS-----ERELQ QELEKDRMYQ QPSEHFMDAK VVSHMSHDLR ASSYVYSKA-
OsmPK20-5 QRIPARTGR TVGPVLPFEN ---PG-AAD PHSARRVV-- RNPVLPATAA NKSQSVLNLK SDYS-----DRQHQ QELEKDRVQY RPAQHMDAK VAPDTPADIR ASSYVYTRSA
OsmPK20-3 HANIAGEPST IVRPAVSSER ---SLAPT L QWQNMTHFL NHALCYQNTV FSGSLLDATG PAQA-----IPRRT PYVDYRSGNL RLYQHVSRRE ---DVQSDTA TAQAAHAASHG
AtMPK16 QGAAVARPCK VVGSVLYRNN CGAATGVEAL EQQRMRMVRN PAAA----- -SQYPKRTQ PCKS-----NRGDE DCATAAEGPS RLYKNTQYIP QKVSAAQDTA MSRWY
OsmPK16-1 QGAA-ARPK AVGSVLYRNN C--STSAAEQ QYEQRRVVRN PAIAPNSSVP LGSSYPRRNG TCKS-----ETGDV ERIDS----S QTGPPKPYVA NKLPATVDGR SGHW
AtMPK17 SACLMRSDSI CASRCVGVSS AVS
AtMPK8 ARNLMSASI SSKCIGVQS KTDK-EDTIA EEDNETVAE LTKDVASLHN S
AtMPK15 ARNLMSSSI SSKCIGVQS KTN1-EDSIV EQQD-ETVAV ---KVASLHN S
OsmPK17-1 ARSLYKASI SASKCAVAD NKEP-EDDYI SEEMEGSDVD LSEQVSRMHS
AtMPK9 ARSLKASI SASKCIGMP RNKS-E---Y GESNNDTVA LSEQVAALHT
OsmPK21-1 ARSLKSESI SASKCIGEP KQDRDQEDSL TESMDETADE VSEKVAQLKT
OsmPK21-2 ARNFLSESI GASQCVVIKE KREKDEE-SM SEYMNEAADG VPHKIAQLKT
OsmPK17-2 PKIYLKASI SASSTCIIRGN KGPK--ENGI SEDMEVVVYE LSDNVTRMLS
30260
130090
599215
219362
56051
139809
1060
184799
68008
645859
599559
36518:4-24
178963
196817
738557
1159263
176895
664529
1194920
432994
98579
88826
54157
914084
503422
95205
229298
455126
256867
419576
74409
521809
54281
48349
594110
27538
96623
380926
263236
154671
67562
226444
1137209
AtMPK13
AtMPK11
459393
69938
591714
107905
99046
863830
287494
662188
492594
176887
618168
492643
125995
122928
154756
68423
OsmPK20-2
Consensus .id.wsvgc i.ae.1.gkp lfgg.d ...ql.i. .lg tp...

```

```

1201 1350
127228 -DFY--GIK SRRARDYIRS LFFKKR---- -IPFSRL F-P--NANPM -----AV DLLEKLLTFN PAKRITVEEA LKHPYLEPY- ---HDPDDE PDAP--PIHE SFFDFDKYKD QLTKEQLK--
287090 -DFY--GIK SRRARDYIRS LFFKKR---- -IPFSRL L-P--NANPL -----AV DLLEKLLTFN PAKRITVEEA LKHPYLEPY- ---HDPDDE PDAP--PIPD SFFDFDRYKE QLTKEQLK--
186494 -DFY--GIK SRRARDYIRS LFFKKR---- -IPFKAL F-P--HANPM -----GK SLSFVPVIPS LMLTPSHIIV -----AL DLLEKLLTFN PAKRITVEEA LKHPYLEPY- ---HDPDDE PDAP--PIPE SFFDFDRYKD QLTKEQLK--
260272 -DFY--AIK SRRARDYIRS LFFKKR---- -IPFSRL V-P--NANAM -----AV DLLEKLLTFN PAKRITVEEA LKHPYLEPY- ---HDPDDE PDAP--PIPE NFFDFDRYKD QLTKEQLK--
119975 -DFY--GIK SRRARDYIRS LFFKKR---- -IPFSRL F-P--TASPM -----AV DLLEKLLTFN PAKRITVEEA LKHPYLEPY- ---HDPDDE PDAP--PIHE SFFDFDKYKD QLTKEQLK--
21447 -DYY--AVK SARAREYIRS LFFKKR---- -VPPASM FGA--DTNPL -----AL DLLEKLLTFN PAKRITVEEA LKHPYLEPY- ---HDPDDE PTAP--PIPE GFFDFDRYKD QLTKEQLK--
692376 -DYY--GIK SRRAREYIRS LFFKKK---- -IPWKAM F-P--KTSDL -----AL DDLERLLAFN PVKRITVEEA LKHPYLEPY- ---HDPDDE PTAD--PIPE EFFDFDKNKD NLTKEQLK--
698785 -DYY--GIK SRRAREYIRS LFFKKK---- -IPWKAM F-P--KTSDL -----AL DDLERLLAFN PVKRITVEEA LKHPYLEPY- ---HDPDDE PTAD--PIPE EFFDFDKNKD NLTKEQLK--
468116 -DYY--GIK SRRAREYIRS LFFKKK---- -IPWKAM F-P--RTSDL -----AL DDLERLLAFN PVKRITVEEA LKHPYLEPY- ---HDPDDE PTAD--PIPE EFFDFDKNKD TLTKEQLK--
274271 -DYY--GIK SRRAREYIRS LFFKKK---- -IPWKAM F-P--KTSDL -----AL DDLERLLAFN PVKRITVEEA LKHPYLEPY- ---HDPDDE PNAE--PIPE EFFDFDKNKD NLTKEQLK--
255486 -DYY--GIK SRRAREYIRS LFFKKK---- -IPWKAM F-P--KTSDL -----AL DDLERLLAFN PVKRITVEEA LKHPYLEPY- ---HDPDDE PNAE--PIPE EFFDFDKNKD NLTKEQLK--
285227 -DYY--GIK SRRAREYIRS LFFKKK---- -IPWKAM F-P--KTSDL -----AL DDLERLLAFN PVKRITVEEA LKHPYLEPY- ---HDPDDE PNAE--PIPE EFFDFDKNKD NLTKEQLK--
18186 -DYY--GIK SRRAREYIRS LFFKKK---- -VPPFTL F-P--KTSDL -----AL DLLEKLLAFN PVKRITVEEA LKHPYLEPY- ---HDPDDE PTAP--PIPE EFFDFDKNKD NLSKQQLK--
465108 -DYY--GIK SRRAREYIRS LFFKKK---- -IPFKHL F-P--KTNLD -----AL DLLEKLLAFN PVKRITVEEA LKHPYLEPY- ---HDPDDE PTAD--PIPE EFFDFDKNKD NLTKEQLK--
1164585 -DYY--GIK SRRAREYIRS LFFKKK---- -VPPFTL F-P--KTSDL -----AL DLLEKLLAFN PVKRITVEEA LKHPYLEPY- ---HDPDDE PTAP--PIPE EFFDFDKNKD NLSKQQLK--
93851 -DYY--GIK SRRAREYIRS LFFKKK---- -IPWKAM F-P--KTSDL -----AL DLLEKLLAFN PVKRITVEEA LKHPYLEPY- ---HDPDDE PNAE--PIPE EFFDFDKNKD NLTKEQLK--
108267 -DYY--GIK SRRAREYIRS LFFKKK---- -IPWTAM F-P--KTSDL -----AL DLLEKLLAFN PVKRITVEEA LKHPYLEPY- ---HDPDDE PTAD--PIPE EFFDFDKNKD NLSKQQLK--
59022 -DYY--GIK SRRAREYIRS LFFKKK---- -IPFKAL F-P--KSNEL -----AL DLLEKLLAFN PVKRITVEEA LKHPYLEPY- ---HDPDDE PTAD--PIPE EFFDFDKNKD NLSKQQLK--
370137 -DYY--GIK SRRAREYIRS LFFKKK---- -IPWKAM F-P--KTSDL -----AL DDLERLLAFN PVKRITVEEA LKHPYLEPY- ---HDPDDE PTAD--PIPE EFFDFDKNKD NLTKEQLK--
532216 -DYY--GIK SRRAREYIRS LFFKKK---- -IPWKAM F-P--KTSDL -----AL DDLERLLAFN PVKRITVEEA LKHPYLEPY- ---HDPDDE PTAD--PIPE EFFDFDKNKD NLTKEQLK--
31240 -DYY--GIK SRRAREYIRS LFFKKK---- -IPWKAL F-P--KTNQD -----AL DDLERLLAFN PVKRITVEEA LKHPYLEPY- ---HDPDDE PTAD--PIPE EFFDFDKNKD NLTKEQLK--
160345 -DYY--GIK SRRAREYIRS LFFKKK---- -IPFKVM F-P--QTNEL -----AL DLLEKLLAFN PVKRITVEEA LKHPYLEPY- ---HDPDDE PTAB--PIPE EFFDFDKNKD NLTKEQLK--
212060 -DYY--GIK SRRAREYIRS LFFKKK---- -IPFKVM F-P--QTNEL -----AL DLLEKLLAFN PVKRITVEEA LKHPYLEPY- ---HDPDDE PTAB--PIPE EFFDFDKNKD NLSKEELK--
327005 -DYY--GIK SRRAREYIRS LFFKKK---- -IPWKAM F-P--KTSDL -----AL DDLERLLAFN PVKRITVEEA LKHPYLEPY- ---HDPDDE PTAB--PIPE EFFDFDKNKD NLTKEQLK--
48412 -DYY--GIK SRRAREYIRS LFFKKK---- -IPWKAM F-P--KTSDL -----AL DDLERLLAFN PVKRITVEEA LKHPYLEPY- ---HDPDDE PTAD--PIPE EFFDFDKSKD NLSKQQLK--
606069 -DYY--GIK SRRAREYIRS LFFKKK---- -VPPKQM F-P--KTSDL -----AL DLLEKLLAFN PVKRITVEEA LKHPYLEPY- ---HDPDDE PTAS--PIPE EFFDFDKNKD NLSKQQLK--
123724 -DYY--GIK SRRAREYIRS LFFKKK---- -VPPKFM F-P--KTSDL -----AL DLLEKLLAFN PVKRITVEEA LKHPYLEPY- ---HDPDDE PTAB--PIPE EFFDFDKNKD NLTKEQLK--
342035 -DYY--GIK SRRAREYIRS LFFKKK---- -VPPFTL F-P--KTSDL -----AL DLLEKLLAFN PVKRITVEEA LKHPYLEPY- ---HDPDDE PTAD--PIPE EFFDFDKNKD NLSKQQLK--
2135321 -DYY--GIK SRRAREYIRS LFFKKK---- -VPPFTL F-P--NTSEL -----AL DLLEKLLAFN PVKRITVEEA LKHPYLEPY- ---HDPDDE PTAD--PIPE EFFDFDKNKD NLTKEQLK--
644393 -DYY--GIK SRRAREYIRS LFFKKK---- -VPPFTL F-P--NTSEL -----AL DLLEKLLAFN PVKRITVEEA LKHPYLEPY- ---HDPDDE PTAD--PIPE EFFDFDKNKD NLTKEQLK--
784446 -DYY--GIK SRRAREYIRS LFFKKK---- -VPPFTL F-P--NTSEL -----AL DLLEKLLAFN PVKRITVEEA LKHPYLEPY- ---HDPDDE PTAD--PIPE EFFDFDKNKD NLSKQQLK--
567834 -DYY--GIK SRRAREYIRS LFFKKK---- -VPPFTL F-P--NTSDI -----AL DLLEKLLAFN PVKRITVEEA LKHPYLEPY- ---HDPDDE PTAD--PIPE EFFDFDKNKD NLSKQQLK--
389770 -DYY--GIK SRRAREYIRS LFFKKK---- -VPPFTL F-P--NTSDI -----AL DLLEKLLAFN PVKRITVEEA LKHPYLEPY- ---HDPDDE PTAD--PIPE EFFDFDKNKD NLSKQQLK--
63860 -DYY--GIK SRRAREYIRS LFFKKK---- -VPPFTL F-P--NTSEL -----AL DLLEKLLAFN PVKRITVEEA LKHPYLEPY- ---HDPDDE PTAD--PIPE EFFDFDKNKD NLSKQQLK--
131603 -DYY--GIK SRRAREYIRS LFFKKK---- -VPPFTL F-P--NTSEL -----AL DLLEKLLAFN PVKRITVEEA LKHPYLEPY- ---HDPDDE PTAD--PIPE EFFDFDKNKD NLSKQQLK--
495859 -DYY--GIK SRRAREYIRS LFFKKK---- -IPFKAL F-P--KSNEL -----AL DLLEKLLAFN PVKRITVEEA LKHPYLEPY- ---HDPDDE PTAD--PIPE GFFDFDKNKD ALSKQQLK--

```





|           |            |      |            |        |      |      |        |            |      |      |          |           |             |             |            |        |            |            |            |           |           |
|-----------|------------|------|------------|--------|------|------|--------|------------|------|------|----------|-----------|-------------|-------------|------------|--------|------------|------------|------------|-----------|-----------|
| 301484    | -DIG--     | -FVK | NTKARLFLTK | LAISKP | ---- | ---- | KKWHDV | FAG--SGTE- | ---- | ---- | NAVSSAI  | DLLSKMLFN | PEKRIISVDTA | LHRPYLATF-  | ----       | FDENLD | VVSS--SPD- | ----       | FPDLPDD    | QSKSDALI- |           |
| 42366     | -TLR--     | -RVG | SPR-       | ----   | ---- | ---- | ----   | ----       | ---- | ---- | ----     | MLCFD     | PAKRISCEDA  | LKHPYLQVM-  | ----       | HDPADE | PVCE--KK-- | ----       | PDFSEEM    | D-SIEGMK- |           |
| 476004    | -ELY--     | -FLT | NARAKRFMNA | EFQKRG | ---- | ---- | PNPTKP | LAQ--MTD-  | ---- | ---- | S--PPDAL | DLLQKMLVD | PNKRISVDEA  | LAHPYLASI-  | ----       | RVNDE  | TTAT--SS-  | ----       | PDFDFENE   | KLTKPVQ-- |           |
| 558476    | -ELY--     | -FLT | NARAKRFMNA | EFQKRG | ---- | ---- | PNPTKP | LAH--MTD-  | ---- | ---- | S--PPDAL | DLLQKMLVD | PNKRISVDEA  | LAHPYLASI-  | ----       | RVNDE  | TTAT--SS-  | ----       | PDFDFENE   | KLTKPVQ-- |           |
| 9954      | -DLH--     | -FVV | SEARAKRFMN | QMRPFG | ---- | ---- | VFPKSL | FPK--A-    | ---- | ---- | ----     | TLPEAV    | NLLQKMLVD   | PVKRISVDEA  | LHPYLASL-  | ----   | HNLEDE     | PVAD--SF-  | ----       | FPDFPEKE  | DLTESRLK- |
| 82136     | -DLH--     | -FVV | SEARAKRFMN | QMRPFG | ---- | ---- | VFPKSL | FPK--A-    | ---- | ---- | ----     | TLPEAV    | NLLQKMLVD   | PVKRISVDEA  | LHPYLASL-  | ----   | HNLEDE     | PVAD--SF-  | ----       | FPDFPEKE  | DLTESRLK- |
| 312415    | -DLH--     | -FVV | SEARAKRFMN | QMRPFG | ---- | ---- | VFPKSL | FPK--A-    | ---- | ---- | ----     | TLPEAV    | NLLQKMLVD   | PVKRISVDEA  | LHPYLASL-  | ----   | HNLEDE     | PVAD--SF-  | ----       | FPDFPEKE  | DLTESRLK- |
| 354114    | -SFKENPLAN |      | KLGRQLLSR  | TOAVAG | ---- | ---- | ITDSTM | FPN--A-    | ---- | ---- | ----     | NPBGL     | DLLQKMLVD   | VEKRIITVEEA | LHRPYLAMY- | ----   | YDEERE     | NAPV--EK-- | ----       | FP-SFDLD  | DLESDRLK- |
| 34134     |            |      |            |        | ---- | ---- |        |            | ---- | ---- | ----     |           |             |             |            | ----   |            |            |            |           |           |
| 20005     | EMAF--     | -VP  | HEAAKRALIQ | HGFYFK | ---- | ---- | RPLIEF | F-P--DANPL | ---- | ---- | ----     | DLLSQMLFN | PAERISIVQA  | LHPYLALQ-   | ----       | QNADE  | PVC--ABFP  | ----       | NPDFERSLD  | -LGVEMPK- |           |
| 518921    | EMSF--     | -VP  | HEAAKRALIQ | HGFYFK | ---- | ---- | RPLIEF | F-P--DANPL | ---- | ---- | ----     | DLLSQMLFN | PAERISIVQA  | LHPYLALQ-   | ----       | QNADE  | PVC--ABFP  | ----       | NPDFERSLD  | -LGVEMPK- |           |
| 503206    | EMSF--     | -VP  | HEAAKRALIQ | HGFYFK | ---- | ---- | RPLIEF | F-P--DANPL | ---- | ---- | ----     | DLLSQMLFN | PAERISIVQA  | LHPYLALQ-   | ----       | QNADE  | PVC--ABFP  | ----       | NPDFERSLD  | -LGVEMPK- |           |
| 10810     | EMAF--     | -VP  | HEAAKRALIQ | HGFYFK | ---- | ---- | RPLIEF | F-P--DANPL | ---- | ---- | ----     | DLLSQMLFN | PAERISIVQA  | LHPYLALQ-   | ----       | QNADE  | PVC--ABFP  | ----       | NPDFERSLD  | -LGVEMPK- |           |
| ATMPK1    | DLEF--     | -ID  | NPKARKYIRS | LYPSQG | ---- | ---- | MSLSRL | Y-P--GAHVL | ---- | ---- | ----     | DLLQKMLVD | PSKRISVDEA  | LQHPYMAPL-  | ----       | YDPNAN | PPA--QVPI  | ----       | D-LVDVDE   | -LREEMIR- |           |
| ATMPK2    | DLEF--     | -ID  | NPKARKYIRS | LYPSQG | ---- | ---- | MSLSRL | Y-P--GAHVL | ---- | ---- | ----     | DLLQKMLVD | PSKRISVDEA  | LQHPYMAPL-  | ----       | YDPNAN | PPA--QVPI  | ----       | D-LVDVDE   | -LREEMIR- |           |
| OSMPK7    | DIEF--     | -ID  | NPKARKYIRT | LYPTPG | ---- | ---- | IPLTSM | Y-P--QAHL  | ---- | ---- | ----     | DLLQKMLVD | PSKRISVTEA  | LHPYMSPL-   | ----       | YDPSAN | PPA--QVPI  | ----       | D-LDIDEN   | -LGDVMIR- |           |
| OSMPK14   | DLEF--     | -ID  | NPKARKYIRS | LYPTPG | ---- | ---- | VPLASM | Y-P--HAHPL | ---- | ---- | ----     | DLLQKMLVD | PTKRISVTEA  | LHPYMSPL-   | ----       | YDPSAN | PPA--QVPI  | ----       | D-LDIDEN   | -LGDVMIR- |           |
| ATMPK14   | DLQF--     | -ID  | NQKARRFIKS | LPFSKG | ---- | ---- | THFSHI | Y-P--HANPL | ---- | ---- | ----     | DLLQKMLVD | PTKRISVSDA  | LHPYMEGL-   | ----       | LEPECN | PSE--NVVP  | ----       | SSLEIDEN   | -MEGMDIR- |           |
| ATMPK7    | DIRF--     | -ID  | NQKARRFIKS | LPFSKG | ---- | ---- | THLSNL | Y-P--QANPL | ---- | ---- | ----     | DLLQKMLVD | PTKRISVSDA  | LHPYMAGL-   | ----       | FDPSGN | PPA--HVPI  | ----       | S-LDIDEN   | --MEPVIR- |           |
| ATMPK12   | SLGF--     | -LR  | SDNARRYVRQ | LPQYPR | ---- | ---- | QQFAAR | F-P--KMPTT | ---- | ---- | ----     | DLLQKMLVD | PNKRISVDEA  | LGHAYLSPH-  | ----       | HDVAKE | PVC--STFP  | ----       | S-PDFEQPS  | -CTEHIK-  |           |
| ATMPK4    | SLGF--     | -LR  | SDNARRYVRQ | LPQYPR | ---- | ---- | QQFAAR | F-P--NMSGT | ---- | ---- | ----     | DLLQKMLVD | PNKRISVDEA  | LGHAYLSPH-  | ----       | HDINEE | PVC--VRFP  | ----       | N-PDFEQPT- | -LTHENIK- |           |
| OSMPK4-1  | SLGF--     | -LR  | SDNARRYVRQ | LPQYPR | ---- | ---- | QQFAAR | F-P--NMSGT | ---- | ---- | ----     | DLLQKMLVD | PNKRISVDEA  | LGHAYLSPH-  | ----       | HDINEE | PVC--VRFP  | ----       | N-PDFEQPT- | -LTHENIK- |           |
| OSMPK16-2 | SLGF--     | -LR  | SDNARRYVRQ | LPQYPR | ---- | ---- | QQFAAR | F-P--NMSGT | ---- | ---- | ----     | DLLQKMLVD | PNKRISVDEA  | LGHAYLSPH-  | ----       | HDINEE | PVC--VRFP  | ----       | N-PDFEQPT- | -LTHENIK- |           |
| ATMPK5    | SLGF--     | -LR  | SDNARRYVRQ | LPQYPR | ---- | ---- | QQFAAR | F-P--NMSGT | ---- | ---- | ----     | DLLQKMLVD | PNKRISVDEA  | LGHAYLSPH-  | ----       | HDINEE | PVC--VRFP  | ----       | N-PDFEQPT- | -LTHENIK- |           |
| ATMPK10   | ELGS--     | -L   | SEYAKRYIRQ | LPTLPR | ---- | ---- | QNSFAK | F-P--SMNST | ---- | ---- | ----     | DLLQKMLVD | PVKRISVTEA  | LHPYMSPL-   | ----       | HDINEE | PVC--VRFP  | ----       | N-PDFEQPT- | -LTHENIK- |           |
| ATMPK6    | ELGF--     | -L   | SEYAKRYIRQ | LPTLPR | ---- | ---- | QNSFAK | F-P--SMNST | ---- | ---- | ----     | DLLQKMLVD | PVKRISVTEA  | LHPYMSPL-   | ----       | HDINEE | PVC--VRFP  | ----       | N-PDFEQPT- | -LTHENIK- |           |
| OSMPK6    | DLDF--     | -V   | SEYAKRYIRQ | LPTLPR | ---- | ---- | QNSFAK | F-P--SMNST | ---- | ---- | ----     | DLLQKMLVD | PVKRISVTEA  | LHPYMSPL-   | ----       | HDINEE | PVC--VRFP  | ----       | N-PDFEQPT- | -LTHENIK- |           |
| ATMPK3    | DLGF--     | -TH  | NEDAKRYIRQ | LPNFRP | ---- | ---- | QPLAKL | F-S--HVNPM | ---- | ---- | ----     | DLLQKMLVD | PNKRISVTEA  | LHPYMSPL-   | ----       | HDINEE | PVC--VRFP  | ----       | N-PDFEQPT- | -LTHENIK- |           |
| OSMPK3    | ELGF--     | -IR  | NEDAKRYIRQ | LPNFRP | ---- | ---- | QPLAKL | F-S--HVNPM | ---- | ---- | ----     | DLLQKMLVD | PNKRISVTEA  | LHPYMSPL-   | ----       | HDINEE | PVC--VRFP  | ----       | N-PDFEQPT- | -LTHENIK- |           |
| 206269    | VIA--      | -TIC | SENTLRFVKN | LKPRDP | ---- | ---- | IPFSQR | FAG--QDPE  | ---- | ---- | ----     | DLLQKMLVD | PKKRISAMEA  | LHPYLSPY-   | ----       | HDPSDE | PAAD--KDFM | ----       | SFM--EAEPL | VDTKWVM-- |           |
| 154265    | LVA--      | -TIC | SENTLRFVKN | LKPRDP | ---- | ---- | IPFSQR | FAG--QDPE  | ---- | ---- | ----     | DLLQKMLVD | PKKRISAMEA  | LHPYLSPY-   | ----       | HDPSDE | PAAD--KDFM | ----       | SFM--EAEPL | VDTKWVM-- |           |
| 168032    | VIS--      | -TIC | SENTLRFVKN | LKPRDP | ---- | ---- | IPFSQR | FAG--QDPE  | ---- | ---- | ----     | DLLQKMLVD | PKKRISAMEA  | LHPYLSPY-   | ----       | HDPSDE | PAAD--KDFM | ----       | SFM--EAEPL | VDTKWVM-- |           |
| 307550    | VIA--      | -TIC | SENTLRFVKN | LKPRDP | ---- | ---- | IPFSQR | FAG--QDPE  | ---- | ---- | ----     | DLLQKMLVD | PKKRISAMEA  | LHPYLSPY-   | ----       | HDPSDE | PAAD--KDFM | ----       | SFM--EAEPL | VDTKWVM-- |           |
| 320251    | VIQ--      | -TIC | SENTLRFVKN | LKPRDP | ---- | ---- | IPFSQR | FAG--QDPE  | ---- | ---- | ----     | DLLQKMLVD | PKKRISAMEA  | LHPYLSPY-   | ----       | HDPSDE | PAAD--KDFM | ----       | SFM--EAEPL | VDTKWVM-- |           |
| 356517    | VIN--      | -TIA | SENTLRFVKS | LKPRER | ---- | ---- | QPLKNN | FKN--ADFP  | ---- | ---- | ----     | DLLQKMLVD | PKKRISAMEA  | LHPYLSPY-   | ----       | HDPSDE | PAAD--KDFM | ----       | SFM--EAEPL | VDTKWVM-- |           |
| 113434    | VIE--      | -TIA | SENTLRFVKS | LKPRER | ---- | ---- | QPLKNN | FKN--ADFP  | ---- | ---- | ----     | DLLQKMLVD | PKKRISAMEA  | LHPYLSPY-   | ----       | HDPSDE | PAAD--KDFM | ----       | SFM--EAEPL | VDTKWVM-- |           |
| 28887     | VIQ--      | -TIC | SENTLRFVKS | LKPRER | ---- | ---- | IPFAQK | FRG--ADPL  | ---- | ---- | ----     | DLLQKMLVD | PKKRISAMEA  | LHPYLSPY-   | ----       | HDPSDE | PAAD--KDFM | ----       | SFM--EAEPL | VDTKWVM-- |           |
| 16635     | VIE--      | -TIC | SENTLRFVKS | LKPRER | ---- | ---- | IPFAQK | FRG--ADPL  | ---- | ---- | ----     | DLLQKMLVD | PKKRISAMEA  | LHPYLSPY-   | ----       | HDPSDE | PAAD--KDFM | ----       | SFM--EAEPL | VDTKWVM-- |           |
| 6923      | VIA--      | -TIC | SENTLRFVKS | LKPRER | ---- | ---- | IPFAQK | FRG--ADPL  | ---- | ---- | ----     | DLLQKMLVD | PKKRISAMEA  | LHPYLSPY-   | ----       | HDPSDE | PAAD--KDFM | ----       | SFM--EAEPL | VDTKWVM-- |           |
| 807502    | VIE--      | -TIC | SENTLRFVKS | LKPRER | ---- | ---- | IPFAQK | FRG--ADPL  | ---- | ---- | ----     | DLLQKMLVD | PKKRISAMEA  | LHPYLSPY-   | ----       | HDPSDE | PAAD--KDFM | ----       | SFM--EAEPL | VDTKWVM-- |           |
| 129058    | VIE--      | -TIA | SENTLRFVKS | LKPRER | ---- | ---- | IPFAQK | FRG--ADPL  | ---- | ---- | ----     | DLLQKMLVD | PKKRISAMEA  | LHPYLSPY-   | ----       | HDPSDE | PAAD--KDFM | ----       | SFM--EAEPL | VDTKWVM-- |           |
| 359241    | VIE--      | -TIC | SENTLRFVKS | LKPRER | ---- | ---- | IPFAQK | FRG--ADPL  | ---- | ---- | ----     | DLLQKMLVD | PKKRISAMEA  | LHPYLSPY-   | ----       | HDPSDE | PAAD--KDFM | ----       | SFM--EAEPL | VDTKWVM-- |           |
| 53282     | VIK--      | -TIC | SENTLRFVKS | LKPRER | ---- | ---- | IPFAQK | FRG--ADPL  | ---- | ---- | ----     | DLLQKMLVD | PKKRISAMEA  | LHPYLSPY-   | ----       | HDPSDE | PAAD--KDFM | ----       | SFM--EAEPL | VDTKWVM-- |           |
| 117789    | VIQ--      | -TIA | SENTLRFVKS | LKPRER | ---- | ---- | IPFAQK | FRG--ADPL  | ---- | ---- | ----     | DLLQKMLVD | PKKRISAMEA  | LHPYLSPY-   | ----       | HDPSDE | PAAD--KDFM | ----       | SFM--EAEPL | VDTKWVM-- |           |
| 170586    | VIE--      | -TIA | SENTLRFVKS | LKPRER | ---- | ---- | IPFAQK | FRG--ADPL  | ---- | ---- | ----     | DLLQKMLVD | PKKRISAMEA  | LHPYLSPY-   | ----       | HDPSDE | PAAD--KDFM | ----       | SFM--EAEPL | VDTKWVM-- |           |
| 162119    | VIQ--      | -TIA | SENTLRFVKS | LKPRER | ---- | ---- | IPFAQK | FRG--ADPL  | ---- | ---- | ----     | DLLQKMLVD | PKKRISAMEA  | LHPYLSPY-   | ----       | HDPSDE | PAAD--KDFM | ----       | SFM--EAEPL | VDTKWVM-- |           |
| 560244    | VIQ--      | -TIA | SENTLRFVKS | LKPRER | ---- | ---- | IPFAQK | FRG--ADPL  | ---- | ---- | ----     | DLLQKMLVD | PKKRISAMEA  | LHPYLSPY-   | ----       | HDPSDE | PAAD--KDFM | ----       | SFM--EAEPL | VDTKWVM-- |           |
| 499279    | VIQ--      | -TIA | SENTLRFVKS | LKPRER | ---- | ---- | IPFAQK | FRG--ADPL  | ---- | ---- | ----     | DLLQKMLVD | PKKRISAMEA  | LHPYLSPY-   | ----       | HDPSDE | PAAD--KDFM | ----       | SFM--EAEPL | VDTKWVM-- |           |
| 898207    | VIA--      | -TIA | SENTLRFVKS | LKPRER | ---- | ---- | IPFAQK | FRG--ADPL  | ---- | ---- | ----     | DLLQKMLVD | PKKRISAMEA  | LHPYLSPY-   | ----       | HDPSDE | PAAD--KDFM | ----       | SFM--EAEPL | VDTKWVM-- |           |
| 500359    | VIA--      | -TIA | SENTLRFVKS | LKPRER | ---- | ---- | IPFAQK | FRG--ADPL  | ---- | ---- | ----     | DLLQKMLVD | PKKRISAMEA  | LHPYLSPY-   | ----       | HDPSDE | PAAD--KDFM | ----       | SFM--EAEPL | VDTKWVM-- |           |
| 390416    | VIQ--      | -TIC | SENTLRFVKS | LKPRER | ---- | ---- | IPFAQK | FRG--ADPL  | ---- | ---- | ----     | DLLQKMLVD | PKKRISAMEA  | LHPYLSPY-   | ----       | HDPSDE | PAAD--KDFM | ----       | SFM--EAEPL | VDTKWVM-- |           |
| 61586     | VIE--      | -TIC | SENTLRFVKS | LKPRER | ---- | ---- | IPFAQK | FRG--ADPL  | ---- | ---- | ----     | DLLQKMLVD | PKKRISAMEA  | LHPYLSPY-   | ----       | HDPSDE | PAAD--KDFM | ----       | SFM--EAEPL | VDTKWVM-- |           |
| 74488     | VIK--      | -TIC | SENTLRFVKS | LKPRER | ---- | ---- | IPFAQK | FRG--ADPL  | ---- | ---- | ----     | DLLQKMLVD | PKKRISAMEA  | LHPYLSPY-   | ----       | HDPSDE | PAAD--KDFM | ----       | SFM--EAEPL | VDTKWVM-- |           |
| 155373    | VIK--      | -TIC | SENTLRFVKS | LKPRER | ---- | ---- | IPFAQK | FRG--ADPL  | ---- | ---- | ----     | DLLQKMLVD | PKKRISAMEA  | LHPYLSPY-   | ----       | HDPSDE | PAAD--KDFM | ----       | SFM--EAEPL | VDTKWVM-- |           |
| 56185     | VIQ--      | -TIC | SENTLRFVKS | LKPRER | ---- | ---- | IPFAQK | FRG--ADPL  | ---- | ---- | ----     | DLLQKMLVD | PKKRISAMEA  | LHPYLSPY-   | ----       | HDPSDE | PAAD--KDFM | ----       | SFM--EAEPL | VDTKWVM-- |           |
| 14909     | VIQ--      | -TIC | SENTLRFVKS | LKPRER | ---- | ---- | IPFAQK | FRG--ADPL  | ---- | ---- | ----     | DLLQKMLVD | PKKRISAMEA  | LHPYLSPY-   | ----       | HDPSDE | PAAD--KDFM | ----       | SFM--EAEPL | VDTKWVM-- |           |
| 176707    | VIQ--      | -TIC | SENTLRFVKS | LKPRER | ---- | ---- | IPFAQK | FRG--ADPL  | ---- | ---- | ----     | DLLQKMLVD | PKKRISAMEA  | LHPYLSPY-   | ----       | HDPSDE | PAAD--KDFM | ----       | SFM--EAEPL | VDTKWVM-- |           |
| 176721    | VIA--      | -TIC | SENTLRFVKS | LKPRER | ---- | ---- | IPFAQK | FRG--ADPL  | ---- | ---- | ----     | DLLQKMLVD | PKKRISAMEA  | LHPYLSPY-   | ----       | HDPSDE | PAAD--KDFM | ----       | SFM--EAEPL | VDTKWVM-- |           |
| 240717    | VIA--      | -TIC | SENTLRFVKS | LKPRER | ---- | ---- | IPFAQK | FRG--ADPL  | ---- | ---- | ----     | DLLQKMLVD | PKKRISAMEA  | LHPYLSPY-   | ----       | HDPSDE | PAAD--KDFM | ----       | SFM--EAEPL | VDTKWVM-- |           |
| 56428     | VIH--      | -TIC | SENTLRFVKS | LKPRER | ---- | ---- | IPFAQK | FRG--ADPL  | ---- | ---- | ----     | DLLQKMLVD | PKKRISAMEA  | LHPYLSPY-   | ----       | HDPSDE | PAAD--KDFM | ----       | SFM--EAEPL | VDTKWVM-- |           |
| 97915     | VIH--      | -TIC | SENTLRFVKS | LKPRER | ---- | ---- | IPFAQK | FRG--ADPL  | ---- | ---- | ----     | DLLQKMLVD | PKKRISAMEA  | LHPYLSPY-   | ----       | HDPSDE | PAAD--KDFM | ----       | SFM--EAEPL | VDTKWVM-- |           |
| 707387    | VIQ--      | -TIC | SENTLRFVKS | LKPRER | ---- | ---- | IPFAQK | FRG--ADPL  | ---- | ---- | ----     | DLLQKMLVD | PKKRISAMEA  | LHPYLSPY-   | ----       | HDPSDE | PAAD--KDFM | ----       | SFM--EAEPL | VDTKWVM-- |           |
| 504013    | VIQ--      | -TIC | SENTLRFVKS | LKPRER | ---- | ---- | IPFAQK | FRG--ADPL  | ---- | ---- | ----     | DLLQKMLVD | PKKRISAMEA  | LHPYLSPY-   | ----       | HDPSDE | PAAD--KDFM | ----       | SFM--EAEPL | VDTKWVM-- |           |
| 37843     | VIQ--      | -TIC | SENTLRFVKS | LKPRER | ---- | ---- | IPFAQK | FRG--ADPL  | ---- | ---- | ----     | DLLQKMLVD | PKKRISAMEA  | LHPYLSPY-   | ----       | HDPSDE | PAAD--KDFM | ----       | SFM--EAEPL | VDTKWVM-- |           |
| 507853    | VIQ--      | -TIC | SENTLRFVKS | LKPRER | ---- |      |        |            |      |      |          |           |             |             |            |        |            |            |            |           |           |

|         |            |             |             |           |            |    |            |            |           |      |        |            |             |            |
|---------|------------|-------------|-------------|-----------|------------|----|------------|------------|-----------|------|--------|------------|-------------|------------|
| 271149  | VIH---TIA  | SENTLRFVQS  | LPKRER----  | ---QPLKDK | FRN---ADPA | AI | DLLDEMLVFD | PKRRVKATDA | LAHEYLSPY | ---- | HDPTDE | PSAEE-KFDM | SFM---DADLP | VDTKIMLMY- |
| 89784   | VIN---TIC  | SENTLRFVQS  | LPKRER----  | ---QPLKDK | FKN---ADPQ | AI | ELLERILMFD | PKRRVKAGEA | LADPYLAPY | ---- | HDPTDE | PSAEE-KFDM | SFM---DADLP | VDTKIMLMYV |
| 114108  | VIQ---TIC  | SENTLRFVQS  | LPKRER----  | ---QPLKDK | FKN---ADPQ | AI | ELLERILMFD | PKRRVKAGEA | LADPYLAPY | ---- | HDPTDE | PSAEE-KFDM | SFM---DADLP | VDTKIMLMYV |
| 173207  | SPWD---PME | S---VATHLEQ | LCTYQSQPPP  | RHPIDFSTL | FPD---CPDT | GI | DLLQQLQLD  | PHQRITVDA  | IAHPFLAFP | ---- | GDPEEE | SME---PGTC | DHF-PEQYAN  | VDTRQHVW-  |
| 127887  | SPWD---KNA | SEFVIEYIKN  | LRDGDGLPPP  | KEPIDFSSL | FPD---CPME | GI | DLLKLNHLN  | PGLRITPDEA | LHPFVEMQ  | ---- | RDPAAE | VDC---PMTF | DFSFYELQ    | EDTLRQCI-  |
| 29226   | SPWD---QNA | SKSVVDYHFN  | LRDSDGGLPP  | TEPIDFAAH | FPE---CPPE | GI | DLLQRLLHD  | PKRRINANE  | LEHPYVALV | ---- | RDPPEE | VEC---NLEF | DFSFPERIQ   | EDTLRQCI-  |
| 167765  | SPWD---SSS | S---VTEYRN  | LRDSDGGLPP  | EEPIDFSTL | FPN---APPE | AI | HLLENLTLD  | PKRRILTANA | LEHPYVAVP | ---- | RDPAAE | IEC---ATLF | DFSFEMIES   | EHVLRQCI-  |
| 150384  | SPWD---SSS | S---VTEYRN  | LRDSDGGLPP  | EEPIDFSTL | FPN---APPE | AI | HLLENLTLD  | PKRRILTANA | LEHPYVAVP | ---- | RDPAAE | IEC---ATLF | DFSFEMIES   | EHVLRQCI-  |
| 57923   | TFWD---SSS | S---VTEYRN  | LRDSDGGLPP  | EEPIDFSSL | FPN---CPPE | GI | DLLQQLMLN  | PKRRITASEA | LHPYVAVS  | ---- | RDPAAE | IEC---EKLF | DFSFEMIES   | EHVLRQCI-  |
| 57924   | TFWD---SSS | S---VTEYRN  | LRDSDGGLPP  | EEPIDFSSL | FPN---CPPE | GI | DLLQQLMLN  | PKRRITASEA | LHPYVAVS  | ---- | RDPAAE | IEC---EKLF | DFSFEMIES   | EHVLRQCI-  |
| 230955  | SPFN---TMA | SFVIEYIHN   | LRSDGSGPPP  | TDVDFQSL  | YFQ---CSTN | GI | NILTQMHLD  | PAKRITVDA  | LHRPYLAFD | ---- | RDPGEE | YDC---PRSF | AFPEFKVDS   | IDELRELI-  |
| 172033  | SPFN---TMA | SFVIEYIHN   | LRSDGSGPPP  | TDVDFQSL  | YFQ---CSTN | GI | NILTQMHLD  | PAKRITVDA  | LHRPYLAFD | ---- | RDPGEE | YDC---PRSF | AFPEFKVDS   | IDELRELI-  |
| 40306   | ETLS---RIG | SQRAQEVYRN  | LYPMR-----  | ---VFPKSL | FPT---ANQ  | AI | HLLENLTLD  | PKRRILTANA | LEHPYLVN  | ---- | HDPADE | PBC---PTTF | DF-SFEAVD   | VDMRREMI-  |
| 693957  | ETLS---RIG | SPRAQDYVRN  | LYPMQK----- | ---VQFASI | FRQ---ANPD | AI | DLLDRMLAFD | PKRRISVEEA | LEHRYLHN  | ---- | HDADSE | PTC---PTTF | DF-QFEVVD   | IGEMKMI-   |
| 508525  | ETLS---RIG | SPRAQDYVRN  | LYPMQK----- | ---IAFATL | FRQ---ANPD | AI | DLLDRMLAFD | PKRRISVEEA | LEHRYLHN  | ---- | HDADSE | PSC---PTTF | DF-QFEVVD   | IGEMKMI-   |
| 471145  | ETLS---RIG | SPRAQDYVRN  | LYPMQK----- | ---IAFATL | FRQ---ANPD | AI | DLLDRMLAFD | PKRRISVEEA | LEHRYLHN  | ---- | HDADSE | PSC---PTTF | DF-QFEVVD   | IGEMKMI-   |
| 480536  | ETLS---RIG | SPRAQDYVRN  | LYPMQK----- | ---IAFATL | FRQ---ANPD | AI | DLLDRMLAFD | PKRRISVEEA | LEHRYLHN  | ---- | HDADSE | PSC---PTTF | DF-QFEVVD   | IGEMKMI-   |
| 471745  | ETLS---RIG | SPRAQDYVRN  | LYPMQK----- | ---VSPFSL | FRQ---ANPD | AI | DLLDLMLAFD | PKRRISVEEA | LEHRYLHN  | ---- | HDADSE | PSC---PTTF | DF-QFEVVE   | IPEMKMI-   |
| 687176  | ETLS---RIG | SPRAQDYVRN  | LYPMQK----- | ---VSPFSL | FRQ---ANPD | AI | DLLDLMLAFD | PKRRISVEEA | LEHRYLHN  | ---- | HDADSE | PSC---PTTF | DF-QFEVVE   | IPEMKMI-   |
| 34863   | STLA---RIG | SPRAQDYVRN  | LYPMQK----- | ---IPFHTL | FRN---ANPD | AI | DLLDLMLAFD | PKRRISVEEA | LEHRYLHN  | ---- | HDADSE | PNC---PTTF | DF-QFEVVE   | VPFMQMI-   |
| 57153   | STLS---RIG | SPRAQDYVRN  | LYPMQK----- | ---IPFQQL | FPR---ANPD | AI | DLLDLMLAFD | PKRRISVEEA | LEHRYLHN  | ---- | HDADSE | PPC---PTTF | DF-QFEVVE   | VPFMQMI-   |
| 147961  | STLS---RIG | SPRAQDYVRN  | LYPMQK----- | ---IPFQQL | FPR---ANPD | AI | DLLDLMLAFD | PKRRISVEEA | LEHRYLHN  | ---- | HDADSE | PAC---PTTF | DF-QFEVVE   | VPFMQMI-   |
| 287354  | STLA---RIG | SPRAQDYVRN  | LYPMQK----- | ---IPFQQL | FPR---ANPD | AI | DLLDLMLAFD | PKRRISVEEA | LEHRYLHN  | ---- | HDADSE | PPC---PTTF | DF-AFETVD   | VPFMRLMI-  |
| 281614  | ATLS---RIG | SPRAQDYVRN  | MAYMPR----- | ---VFPSSQ | FPR---ANPD | AI | DLLDLMLAFD | PKRRISVEEA | LEHRYLHN  | ---- | HDADSE | PSC---AVPF | NF-AFEVVE   | VSDMRQMI-  |
| 29684   | ETLS---RIG | SPRAQDYVRN  | LYPMQK----- | ---KSPFSL | FPN---ANPD | AI | DLLDLMLAFD | PKRRISVEEA | LEHRYLHN  | ---- | HDADSE | PDC---PTTF | NF-DFEVVD   | VPFMQMI-   |
| 144400  | ETLS---RIG | SPRAQDYVRN  | LYPMQK----- | ---KSPFSL | FPN---ANPD | AI | DLLDLMLAFD | PKRRISVEEA | LEHRYLHN  | ---- | HDADSE | PDC---PTTF | NF-DFEVVD   | VPFMQMI-   |
| 136175  | ETLS---RIG | SPRAQDYVRN  | LYPMQK----- | ---KSPFSL | FPN---ANPD | AI | DLLDLMLAFD | PKRRISVEEA | LEHRYLHN  | ---- | HDADSE | PDC---PTTF | NF-DFEVVD   | VPFMQMI-   |
| 126818  | ETLS---RIG | SPRAQDYVRN  | LYPMQK----- | ---KSPFSL | FPN---ANPD | AI | DLLDLMLAFD | PKRRISVEEA | LEHRYLHN  | ---- | HDADSE | PDC---PTTF | NF-DFEVVD   | VPFMQMI-   |
| 2138682 | ETLS---RIG | SPRAQDYVRN  | LYPMQK----- | ---KSPFSL | FPN---ANPD | AI | DLLDLMLAFD | PKRRISVEEA | LEHRYLHN  | ---- | HDADSE | PDC---PTTF | NF-DFEVVD   | VNEMKMI-   |
| 48096   | ETLS---RIG | SPRAQDYVRN  | LYPMQK----- | ---KSPFSL | FPN---ANPD | AI | DLLDLMLAFD | PKRRISVEEA | LEHRYLHN  | ---- | HDADSE | PDC---PTTF | NF-DFEVVD   | VNEMKMI-   |
| 179022  | ETLS---RIG | SPRAQDYVRN  | LYPMQK----- | ---KSPFSL | FPN---ANPD | AI | DLLDLMLAFD | PKRRISVEEA | LEHRYLHN  | ---- | HDADSE | PDC---PTTF | NF-DFEVVD   | VNEMKMI-   |
| 778216  | ETLS---RIG | SPRAQDYVRN  | LYPMQK----- | ---KSPFSL | FPN---ANPD | AI | DLLDLMLAFD | PKRRISVEEA | LEHRYLHN  | ---- | HDADSE | PDC---PTTF | NF-DFEVVD   | IDEMKMI-   |
| 66550   | ETLS---RIG | SPRAQDYVRN  | LYPMQK----- | ---KSPFSL | FPN---ANPD | AI | DLLDLMLAFD | PKRRISVEEA | LEHRYLHN  | ---- | HDADSE | PDC---PTTF | NF-DFEVVD   | IGEMKMI-   |
| 190738  | ETLS---RIG | SPRAQDYVRN  | LYPMQK----- | ---KSPFSL | FPN---ANPD | AI | DLLDLMLAFD | PKRRISVEEA | LEHRYLHN  | ---- | HDADSE | PDC---PTTF | NF-DFEVVD   | IGEMKMI-   |
| 1107049 | ETLR---RIG | SPRAQDYVRN  | LYPMQK----- | ---KSPFSL | FPN---ANPD | AI | DLLDLMLAFD | PKRRISVEEA | LEHRYLHN  | ---- | HDADSE | PDC---PTTF | NF-DFEVVD   | IGEMKMI-   |
| 504269  | ETLR---RIG | SPRAQDYVRN  | LYPMQK----- | ---IAFQRL | FRN---ANPD | AI | DLLDLMLAFD | PKRRISVEEA | LEHRYLHN  | ---- | HDADSE | PTC---PTTF | DF-RFEVVD   | IHEMKMI-   |
| 432134  | ETLR---RIG | SPRAQDYVRN  | LYPMQK----- | ---IAFQRL | FRN---ANPD | AI | DLLDLMLAFD | PKRRISVEEA | LEHRYLHN  | ---- | HDADSE | PTC---PTTF | DF-RFEVVD   | IHEMKMI-   |
| 59068   | ETLS---RIG | SPRAQDYVRN  | LYPMQK----- | ---IAFQRL | FRN---ANPD | AI | DLLDLMLAFD | PKRRISVEEA | LEHRYLHN  | ---- | HDADSE | PTC---PTTF | DF-RFEVVD   | IGEMKMI-   |
| 336185  | ETLA---RIG | SPRAQDYVRN  | LYPMQK----- | ---VFPKTL | FPQ---ANPD | AI | DLLDLMLAFD | PKRRISVEEA | LEHRYLHN  | ---- | HDADSE | PNC---PTTF | DF-TFEVVD   | VDMRMI-    |
| 343155  | ETLA---RIG | SPRAQDYVRN  | LYPMQK----- | ---VFPKTL | FPQ---ANPD | AI | DLLDLMLAFD | PKRRISVEEA | LEHRYLHN  | ---- | HDADSE | PNC---PTTF | DF-TFEVVD   | VDMRMI-    |
| 326648  | ETLA---RIG | SPRAQDYVRN  | LYPMQK----- | ---VFPKTL | FPQ---ANPD | AI | DLLDLMLAFD | PKRRISVEEA | LEHRYLHN  | ---- | HDADSE | PNC---PTTF | DF-TFEVVD   | VDMRMI-    |
| 425863  | ETLA---RIG | SPRAQDYVRN  | LYPMQK----- | ---VFPKTL | FPQ---ANPD | AI | DLLDLMLAFD | PKRRISVEEA | LEHRYLHN  | ---- | HDADSE | PTC---PTTF | DF-QFEVVD   | VPFMKMI-   |
| 436998  | ETLS---RIG | SPRAQDYVRN  | LYPMQK----- | ---IPFQQL | FPQ---ANPD | AI | DLLDLMLAFD | PKRRISVEEA | LEHRYLHN  | ---- | HDADSE | PSC---PTTF | DF-QFEVVD   | VPFMKMI-   |
| 257317  | ETLS---RIG | SPRAQDYVRN  | LYPMQK----- | ---IPFQQL | FPQ---ANPD | AI | DLLDLMLAFD | PKRRISVEEA | LEHRYLHN  | ---- | HDADSE | PSC---PTTF | DF-QFEVVD   | VPFMKMI-   |
| 998070  | ETLS---RIG | SPRAQDYVRN  | LYPMQK----- | ---VSPFSL | FRN---ANPD | AI | DLLDLMLAFD | PKRRISVEEA | LEHRYLHN  | ---- | HDADSE | PSC---PTTF | DF-QFEVVE   | INEMKMI-   |
| 49449   | ETLS---RIG | SPRAQDYVRN  | LYPMQK----- | ---VSPFSL | FRN---ANPD | AI | DLLDLMLAFD | PKRRISVEEA | LEHRYLHN  | ---- | HDADSE | PAC---PTTF | DF-QFEVVE   | IAEMKMI-   |
| 498377  | ETLS---RIG | SPRAQDYVRN  | LYPMQK----- | ---VSPFSL | FRN---ANPD | AI | DLLDLMLAFD | PKRRISVEEA | LEHRYLHN  | ---- | HDADSE | PAC---PTTF | DF-QFEVVE   | IAEMKMI-   |
| 184715  | ETLR---RIG | SPRAQDYVRN  | LYPMQK----- | ---IAFQRL | FRN---ANPD | AI | DLLDLMLAFD | PKRRISVEEA | LEHRYLHN  | ---- | HDADSE | PTC---PTTF | DF-RFEVVD   | IHEMKMI-   |
| 51223   | ETLC---RIG | SARAQDYVRN  | LYPMQK----- | ---APFSSL | FPN---ANPD | AI | DLLDLMLAFD | PKRRISVEEA | LQHRYSIV  | ---- | HDADSE | PDC---PTTF | DF-SFEVNE   | VPFMKMI-   |
| 66669   | ETLC---RIG | SARAQDYVRN  | LYPMQK----- | ---APFSSL | FPN---ANPD | AI | DLLDLMLAFD | PKRRISVEEA | LQHRYSIV  | ---- | HDADSE | PDC---PTTF | DF-SFEVNE   | VPFMKMI-   |
| 649898  | ETLS---RIG | SPRAQDYVRN  | LYPMQK----- | ---VFPKTL | FPN---ANPD | AI | DLLDLMLAFD | PKRRISVEEA | LEHRYLHN  | ---- | HDADSE | PDC---PTTF | DF-SFEVVD   | VPFMKMI-   |
| 253817  | ETLS---RIG | SPRAQDYVRN  | LYPMQK----- | ---VFPKTL | FPN---ANPD | AI | DLLDLMLAFD | PKRRISVEEA | LEHRYLHN  | ---- | HDADSE | PDC---PTTF | DF-SFEVVD   | VPFMKMI-   |
| 618068  | ETLS---RIG | SPRAQDYVRN  | LYPMQK----- | ---KSPFSL | FPN---ANPD | AI | DLLDLMLAFD | PKRRISVEEA | LEHRYLHN  | ---- | HDADSE | PDC---PTTF | NF-EFEVVD   | IDEMKMI-   |
| 108847  | SALT---KIG | SPRAQDYVRN  | LYPMQK----- | ---IHYREI | LFN---ANPL | AI | DLLDLMLAFD | PKRRISVEEA | LHPYLVAVN | ---- | HDQDPE | PES---KIKF | DKFTFETVD   | MESMKQLI-  |
| 33629   | ATLT---RIG | SPRAQDYVRN  | LYPMQK----- | ---VSISEL | FPN---ANPL | AI | DLLDLMLAFD | PKRRISVEEA | LHPYLVAVN | ---- | HDQDPE | PES---KIKF | DKFTFETVD   | MESMKQLI-  |
| 54711   | ATLT---RIG | SPRAQDYVRN  | LYPMQK----- | ---VSISEL | FPN---ANPL | AI | DLLDLMLAFD | PKRRISVEEA | LHPYLVAVN | ---- | HDQDPE | PES---KIKF | DKFTFETVD   | MESMKQLI-  |
| 88920   | ETLR---RIG | SPRAQDYVRN  | LYPMQK----- | ---VFPKTL | FPN---ANPL | AI | DLLDLMLAFD | PKRRISVEEA | LHPYLVAVN | ---- | HDQDPE | PES---KIKF | DKFTFETVD   | MESMKQLI-  |
| 51479   | ETLS---RIG | SPRAQDYVRN  | LYPMQK----- | ---VDFVTL | FPQ---ANPE | AI | DLLDLMLAFD | PKRRISVEEA | LHPYLVAVN | ---- | HDQDPE | PES---KIKF | DKFTFETVD   | MESMKQLI-  |
| 86943   | ETLT---RIG | SKRAQEVYRN  | LYPMQK----- | ---VDFVTL | FPQ---ANPE | AI | DLLDLMLAFD | PKRRISVEEA | LHPYLVAVN | ---- | HDQDPE | PES---KIKF | DKFTFETVD   | MESMKQLI-  |
| 100835  | ETLT---RIG | SKRAQEVYRN  | LYPMQK----- | ---VDFVTL | FPQ---ANPE | AI | DLLDLMLAFD | PKRRISVEEA | LHPYLVAVN | ---- | HDQDPE | PES---KIKF | DKFTFETVD   | MESMKQLI-  |
| 319719  | ETLR---RIG | SKVVDYHFN   | LYPMQK----- | ---VDFVTL | FPQ---ANPE | AI | DLLDLMLAFD | PKRRISVEEA | LHPYLVAVN | ---- | HDQDPE | PES---KIKF | DKFTFETVD   | MESMKQLI-  |
| 822494  | ETLR---RIG | SKVVDYHFN   | LYPMQK----- | ---VDFVTL | FPQ---ANPE | AI | DLLDLMLAFD | PKRRISVEEA | LHPYLVAVN | ---- | HDQDPE | PES---KIKF | DKFTFETVD   | MESMKQLI-  |
| 161919  | ETLC---RIG | SARAQDYVRN  | LYPMQK----- | ---VDFVTL | FPQ---ANPE | AI | DLLDLMLAFD | PKRRISVEEA | LHPYLVAVN | ---- | HDQDPE | PES---KIKF | DKFTFETVD   | MESMKQLI-  |
| 158631  | ETLC---RVG | SARAQDYVRN  | LYPMQK----- | ---VDFVTL | FPQ---ANPE | AI | DLLDLMLAFD | PKRRISVEEA | LHPYLVAVN | ---- | HDQDPE | PES---KIKF | DKFTFETVD   | MESMKQLI-  |
| 115223  | ETLR---RVG | SARAQDYVRN  | LYPMQK----- | ---VDFVTL | FPQ---ANPE | AI | DLLDLMLAFD | PKRRISVEEA | LHPYLVAVN | ---- | HDQDPE | PES---KIKF | DKFTFETVD   | MESMKQLI-  |
| 344665  | ETLR---RVG | SARAQDYVRN  | LYPMQK----- | ---VDFVTL | FPQ---ANPE | AI | DLLDLMLAFD | PKRRISVEEA | LHPYLVAVN | ---- | HDQDPE | PES---KIKF | DKFTFETVD   | MESMKQLI-  |
| 178050  | ETLQ---RVG | SDRAQDYVRN  | LYPMQK----- | ---VDFVTL | FPQ---ANPE | AI | DLLDLMLAFD | PKRRISVEEA | LHPYLVAVN | ---- | HDQDPE | PES---KIKF | DKFTFETVD   | MESMKQLI-  |
| 234927  | ATLT---RVG | SARAQDYVRN  | LYPMQK----- | ---VDFVTL | FPQ---ANPE | AI | DLLDLMLAFD | PKRRISVEEA | LHPYLVAVN | ---- | HDQDPE | PES---KIKF | DKFTFETVD   | MESMKQLI-  |
| 328916  | ATLT---RIG | STRAQDYVRN  | LYPMQK----- | ---VDFVTL | FPQ---ANPE | AI | DLLDLMLAFD | PKRRISVEEA | LHPYLVAVN | ---- | HDQDPE | PES---KIKF | DKFTFETVD   | MESMKQLI-  |
| 273327  | ATLT---RIG | STRAQDYVRN  | LYPMQK----- | ---VDFVTL | FPQ---ANPE | AI | DLLDLMLAFD | PKRRISVEEA | LHPYLVAVN | ---- | HDQDPE | PES---KIKF | DKFTFETVD   | MESMKQLI-  |
| 338804  | ATLT---RIG | STRAQDYVRN  | LYPMQK----- | ---VDFVTL | FPQ---ANPE | AI | DLLDLMLAFD | PKRRISVEEA | LHPYLVAVN | ---- | HDQDPE | PES---KIKF | DKFTFETVD   | MESMKQLI-  |
| 527701  | ETLR---RVG | SPRAQDYVRN  | LYPMQK----- | ---VDFVTL | FPQ---ANPE | AI | DLLDLMLAFD | PKRRISVEEA | LHPYLVAVN | ---- | HDQDPE | PES---KIKF | DKFTFETVD   | MESMKQLI-  |
| 81317   | DTLR---RVG | SPRAQDYVRN  | LYPMQK----- | ---VDFVTL | FPQ---ANPE | AI | DLLDLMLAFD | PKRRISVEEA | LHPYLVAVN | ---- | HDQDPE | PES---KIKF | DKFTFETVD   | MESMKQLI-  |
| 831329  | DTLR---RVG | SPRAQDYVRN  | LYPMQK----- | ---VDFVTL | FPQ---ANPE | AI | DLLDLMLAFD | PKRRISVEEA | LHPYLVAVN | ---- | HDQDPE | PES---KIKF | DKFTFETVD   | MESMKQLI-  |
| 676624  | DTLR---RVG | SPRAQDYVRN  | LYPMQK----- | ---VDFVTL | FPQ---ANPE | AI | DLLDLMLAFD | PKRRISVEEA | LHPYLVAVN | ---- | HDQDPE | PES---KIKF | DKFTFETVD   | MESMKQLI-  |
| 826941  | DTLR---RVG | SPRAQDYVRN  | LYPMQK----- | ---VDFVTL | FPQ---ANPE | AI | DLLDLMLAFD | PKRRISVEEA | LHPYLVAVN | ---- | HDQDPE | PES---KIKF | DKFTFETVD   | MESMKQLI-  |
| 773     |            |             |             |           |            |    |            |            |           |      |        |            |             |            |



```

107905
99046
863830
287494
662188
492594
176887
618168
492643
125995
122928
154756
68423
OsmPK20-2
Consensus .....i.s.r...y...lp.... .pf...f...a.p. a.dll...l.f.d.p.kri....a.l.hpyl... hdp.de.p.... .f.f.....
1351
127228 --RKFLFLW FHCHS
287090 --RKLK
186494 --QMLYDEIA H
260272 --QMLFDEIM H
119975 --RRWKLK
2147 --CKWKGKANC ATDMRAGIV
692376 --LLIYQEIM R
698785 --LLIYQEIM R
468116 --VLIYQEIM R
274271 --QLIYEEIM RS
255486 --RLIYEEIL R
285227 --RFIYDEIM R
18186 --QLIYQEIM RDPIEP---- --PPFRPQNG LNPPLTSHRS PAGESSKHA LGADLLVLCR AQPRP--PAS DAGFLFAELP AAEAAAIQT ILTTRGRGSR GCPSLRVTAG RLGLASQ
465108 --QLAEKLA PLRANYEHSS VIIVPCPDLR ESPFLLAHQG LSGDEKAADI GQOHTLYPRP MKDKTYLQGG IAREMEMIVD GGFYPPFVAVT FLGAGAGSYD LVGQNCCEMVF NFGMRYADM LRSNNGRYV RIEPQTKDVL VENTDQHKWE
1164585 --QLIYQEIM KGPTTMTQGL IRRFSTESSR DSGDFPHAHG GPALSNSSND G--VHDVFTP GQPTLSFPR PPLPDVVLH GYKDSFPPES RLLTPAFAEE IRTMVPERL- RISEDWRLYV SLAQNGLSLA TLYQQCR--- -----QYE
93851 --RLIYEEIM RRGITTSQDA PRITPAMVF DWMEPMAVT AKRISDITDW AQQVRTVGN GDDDDND LVALRERLH AQAAQAGAGI QAQAQAGGG EKL
108267 --RLIYEEIM RDHFTA---A PMQYDRM-- STLIDPASSP RKHFSPISL GGDQIPICYD NDDDDSDSHD DSGAHTQIWK GRQCFSR
59022 --SRKTKLR ERGSL--- --ICPSGISQ RDILLPDSRS DQEVRESGIW LSYLCOHGLK REISRAPDWA GUVRLWRSFD
370137 --RDYAVNAP EHAVSSYLTS LTDGRVEGFS ASIPHICVDL SRLV
532216 --RDHAVNVP EPNFIMLDS LHGSTWSTIR ARVSIITGIY PGFVIGILASS
31240 --GKKSOCIO AGSDVLLYSQ CSFSRRSCDR FVSCVARSRS YA
160345 --REYHPDNL LKETSLSPTD KSFVTSVDLP GDYAVNI
212060 --REYHPDNL LKETSLSPTD KSFVTSVDLP GDYAVNI
327005 --RKLRLPHL TNRFN
48412 --RKRINEI QCSANKPNQV
606069 --ELIYQEIM R
123724 --QLIYQEIM R
342035 --QLIYQEIM R
2135321 --QLIYQEIM SYASKTPATP ATFPESPMPD
644393 --QLIYQEIM R
784446 --QLIYQEIM R
567834 --QLIYQEIM R
389770 --QLIYQEIM R
63860 --QLIYQEIM R
131603 --QLIYQEIM R
495859 --YLMYEEIM R
434551 --YLMYEEIM R
140828 --QLIYQEIM R
66435 --TLIYEEIM RTTN
383913 --LPIYEEIM R
323815 --LPIYEEIM R
396599 --VLIYEEIM R
74447 --CEFAPILV LAAFSCLWID L
83363 --REFNRPFL YEIYLLIHS LYLGRNHAN LIDCFN
50905 --TLIYEEIM RTTN
650405 --STSPHGLL SCAD
493847 --TLIFEEIM R
95409 --GLIYEEVM GHGGQA
835420 --GLIYEEVT GTGVNPN
343609 --QLIYDEIM RPI
67554 --GMLIYARF DLN
216015 --RMLYEEIM KPL
52193 --KMLYEEIM KPL
53916 --KMLYDEIM KPL
83931 --KLLYDEVM KPLQYD
51986 --AMIYNEVM TPL
49589 --SMIFNEIM RP
862988 --ELLYEEIM SFQPAPMT
833500 --ELLYEIM SFRPAPIT
810703 --ELLYEIM SFCPAPIT
457677 --ELLYEIM SFCPAPIT
161161 --ELLYEIM SFRPAPMS
1588194 --ELLYEIM SFRPDPMS
98485 --ELLYEIM SFRPDPMV
1443964 --ELLYEIM SFRPTMGA
864221 --ELLYEIM SFCPAPIT
903905 --ELLYEIM SYNQPIT
1147795 --ELLYEIM SFRPTMQ
622735 --ELLYEIM SFNVPMTAQ
166786 --ELLYEIM SFTPVMTSS
2641010 --ELLYEIM SFNPAPIT
28679 --DLLYQEIM SFRPAPIS
101027 --ELLYEIM SFRPAPIT
564549 --ELLYEIM SFHPQIT
227465 --ELLYEIV TFKPTI
18095 --ELLYEIM SFRPAPIT
338545 --ELLYEIM SFRPTMQ
134728
275037
503339 --QRAPL
40745 --RLLFEEIE SQFQSSCIFY FALC
43876 --RRMYDEVT GFQPLV
14716 --RRMYDEVT GFQPLV
15138 --ELLYEEV AFQVSLFLS FAILFEPVSL TMTSACFISL LSRGANALRP
67488 --QLLFEEIM TFKPIC
28680
177514 --ELLYEEVL AFVPSINAPG ESHNANN
53880 --ELLYEEVM SFQPSI
778168 --GLLYEEVL SFVPSI
388025 --ELLYEEIQ SFVPSI
581713 --GLRPSTLL TSFLTAASRA SVRGNRLFHT VHLSV
229317 --ELLYEIM SFTPSI
829657 --ELLYEIM SFIPAI
70959 --ELLYEEVQ SFVPCI
32857 --ELLYEEVQ SFVPCI
561172 --KRLYDEVI SFQSLI
573944 --QLLYDEVM SFQSLI
740770 --QLLYEEVI AFEPQALAP LTSAWAVGSL PEASEVRPGK GSG
16071 --TLLYEETI SFKSAL
1126092 --TLLYEETI SFKSAL
478842 --ELLYEEVT AFQSLI
46649 --ELLYEEVM AMPSYI
601377 --ELLYEEVH SFTPAI
866574 --VLIYQEVV KPPSQMSAYL ASGYS
521401 --VLIYQEVV KPPSQMSAYL ASGYS
850251 --VLIYQEVV KPPSQMSAYL ASGYS
832111 --ELIYQEVV SSKTQPNFS LCMADATP
832110 YAPFIVLVIG HDLYNSTCYS ITLINTNVR DIQRSHLFKD SATELFLVYG RCHTITMFRM VGVTMTLEEL FWMRVYIWE NFFNFEMFATR CFLFSV
676666 --VLIYKEIT SPRPQARVYS MSEDER
1143376 --VLIYKEIT ASRQDTSMDV DDCP
457401 --RLIYAEVI AASPQASLS VSEI
834255 --VLIYKEIT NAQASQPSLL LAKDA
133042 --VLIYEEVT RPRAQ
30507 --GLIYEEVT RFGS
646041 --VMIYEEVT KPRAQPAQ
570964 --VLIYEEVT KPRPPPGTQ

```



```

301734 --LLIYQEIT TPPPNEYSS Q
154378 --VLIYNEVM SAHQYPOQQO IQIPSPGVPT NGGLNLMGSG S
90189 --VLIYNEIM RPDTPGAPIT MNNNFFS
448371 --LRIYEEVL QTPTYPIDAT AMQM
476779 --LRIYEEVL QTPTYPIDAT AMQM
68819 FSLSLFLFRTP P-SPLLSLLH PCFRSLMSPD FFFVLFQVFP LPARRIDIRG GDEHASASAA GGYRGGCARG GDVVRGDQCS AVIYVFLFSL HENKSGFR
2671102 SVPPSARR-- P-SADLRARW LAYKGLLCAE YLLFFQDLGG MSADD
940143 FTVFNPBHARI DRLLPELIIYO EVTRSFATAS
585786 -----ELIYE EVTRPLAPSG S
349085 --ELIYQEVV RSFATAS
1539717 --VLVINEVT RFPDRRIPP QQPQPS
24638 --ILIYQEVV KPIPPQLEA
75000 --ILIYQEVV KPIPPQLEA
1245527 --VLIYEEIM KP
103018 --ELIYEEVC H
43883 --RLIYDEIT SPPPQHS
58913 --QLIFNEVM N
18326 --VLIFEEVI RPSNHQQAVM VDTPTPVGP SAATPIAPNP DSAMALS
301059 --VLIFEEVI RPSNHQQAVM VDTPTPVGP SAATPIAPNP DSAMALS
12410 --VLIFEEVI RPSNHQQAVM VDTPTPVGP SAATPIAPNP DSAMALS
18327
184754 --MLLYEEIT KK
99455 --KMLYDEIM SR
706256 --KLIWNEIF S
653342 --KLIWNEIF S
462249 --AAPTCKVR NMSHFRNVFP RCIIRNVKLG LEKFATLSNP DSGSESKYV AQPNTGYSG HIPPTLKLAP TVSMIFQGLL LLEKPTMLMK KM
326973 --LRIYNEIM R
77855 --QRLSSPPF LLLFGKGVVM ICIPFVSS
338563 --ELLYEIM SFRPTM
233520 --ELLYEIM SFRPAPIT
73610 --ELLYEIM SFRPAPIT
150924 --ELLYEIM SFRPAPIT
348809 --ELLYEIM SYNQPIT
913771 --ELLYEIM SFRPTMGA
913918
747578 PIEMKADMLY DELMKTME
458977 PIEMKADMLY DELMKTMEVR STRNAAS
41459 DGRPVKHDEL SKADIKELLY EVVMREETL VKTTKAHALK QCDQLVKDPA ACESEGRITVS AWACKDKMGV VQDCISQVTP PEAMTKVRAE YLRLRNEKIV QDVAAAGRAS GTGQANTRKH AERKVSANCL REVSNSELG PTSGAAALMY
1397463 -----EL NKEELKQLLY DVMFSNVI
149203 -----SHSI PSLTHQTAVY LVLRRRARS BRIDKELNKD ELKQLLYDEV MSFQSLI
102078 --TYLYDAIL EMTRSRLK
36766:44-3 --RQLYREIK QLRG
54278 --RQIYNQII TAKRD
29185
790328 --VLIYQEVV KPPSQMSAYL ASGYS
765763 --VLIYQEVV KPPSQMSAYL ASGYS
1491990 --VNDIDGKL DDPVR-DRV TTFWSVHDDM RWFFLREFAI ILRSSKQTN AHLPENLLSI LERLTTMPD VSELENEFVIF SFARAPPKAF LPPQEETEDA EAEDDWRTF DTPDADPISA DQFVKGSQR VYRLSTHQNP FDKAPEPSYI
32998 --ELLYEIM SFRPPMV
2601990 --VLIYEEVT RPQPFQLEE A
262460 --RLIYEEIL R
11717 --DLLCEDIE QFHPPVPSV APIPLNTAAS RFFRMGMTAS AS
532299 --NLLCEDIE QFHPPVPTS I APLPLGAAAS RFFRMGMTAS AS
551831 --NLLCEDIE QFHPPVPTS I TMPLSAAAS RFFRMGMTAS AS
301484 --NLLCEDIE QFHPPVPTS I APLPLGAAAS RFFRMGMTAS AS
42366 --KLIYEEVM SFRAEVRAG-----AR AAGQVRKQDS LPIPSRD-EI ISSPVQEHAP RINGATSVTG ARATAPEPIM DDPSSAELEKE LSRQNLGK
476004 --RLIWEEMR HFHFDCEEP QVYSATAG-----EG ENDSFATTQA SNTVPTVTP ATAEQDNTPS S-----ENVM ATTAEEV-- STPATEEARF EDDGEAA--P SVDEKQSTNS DHKIVRTSVG SDNPTDAQTR QEAGEPAREV
558476 --RLIWEEMR HFHFDCEEP QVSNAAA-----EG ENDSFATTQA SNTVPTVTP ATAEQDNTSS SSSSEATGT ATTAEEVEV TTPATEEARF EDDGEASTR TGDDKQSTNS DQKIVRTSVG SDNPTDAQTR QEAGEPAREV
9954 --ELIPEEIL QIHDAPRSP IKVHAGLSS P-----PTEQV LSPSTTRSHG QS
82136 --ELIPEEIL KIHDPAPRSP LKTPSTGLTS P-----PAEQV LSPSTTRSHG QD
312415 --ELIPEEIL KIHDPAPRSP LKSPAGLTS P-----PAEQV LSPSTTRSHG QD
354114 --ELMPKEIC HFHPE---EM VKRAKQREN P-----ETVEK LPPGWVKRES RSVPGKFPYIS NPKRGISTWI KEEMD
34134
20005 --EELQRLVF QECMSIHQLE ARHMQ
518921 --EELQRLVF QECMSIHQLE ARHMQ
503206 --EELQRLVF QECMSIHQLE ARHMQ
10810 --EELQRLVF QECMSIHQLE ARHMQ
AtMPK1 --EMMNWEML HYHPQASTLN TEL
AtMPK2 --ELMWKEMI HYHPEAATIN NNEVSEF
OsMPK7 --EMMWQEML HYHPEVAVG NM
OsMPK14 --EMMWHEML HYHPEVAVAM SAR
AtMPK14 --EMMWHEML HYLPRRA
AtMPK7 --EMMNWEML YHPEAEISN A
AtMPK12 --ELIYKESV KFNPDH
AtMPK4 --ELIYRETV KFNPDQSV
OsMPK4-1 --ELIWRRESL AFNPDPPY
OsMPK16-2 --ELIWRREAL KFNPEPIH
AtMPK5 --ELVWLESV KFNPLPSI
AtMPK10 --ELIYCEAL AFNPLPSND
AtMPK6 --ELIWRREAL AFNPDYQQ
OsMPK6 --DLIYQGL AFNPDYQ
AtMPK3 --EMIYQEA I ALNPTYG
OsMPK3 --QLIFNEAI EMNPNIRY
206269 ----- YSEILDFHNV DNVGGAQYLG TPLTGPKLEA QDAVAFQQ
154265 ----- YSEILDFHNV DNVGGSQFLG TPLTGTMGN PDGATVDGNM VPTTSSNNFP AQQ
168032 ----- YSEILDFHNV DNVGGSQYLG TPLAGV--- -DGO----- -DTAYQQ
307550 ----- YSEILDFHNV DNIDGTQFLG TPLTGTMTEN PDGNI----- -DTSTFQQ SQQ
320251 ----- YSEILDYHNV DA-TNGEVT NGE
356517 KTGIRKXWSD QARLTSFDYR YSEILDYHNG ED-AGSAKDK PEPEGERERM WFSGEESSE DTWDLTRTK SDEK----- -RYHATRQS GRGKVSDEQE
113434 ----- YSEILDHFQV SD-PGAADG-- EAPSGALAG P-EQGSRLGN GNVEHIGK
28887 ----- YSEILDPHNI ENTPDANECP VAEQSETPLS PNPPTQTAI NQLTFLRLL LEIATPAILI VPLPPTWRA LFKTIAESQI IAKVQYGLKI TTFVALLFV DAVNMQKLIQ REKEVMHEGQ TVQDRLRSQT
16635 ----- YSEILDPHNV DQTVGEGEAS QQLAGPQ
6923 ----- YSEILDHFQV GEGESEHAT VPIITSPNGE IPKGAVIAAQ PVPAQ
807502 ----- YSEILDHFQV --GDP---- -TDPNNQNYQ NYPNYQDPSM GLVQ
129058 ----- YSEILDHFQV --GET---- TTSAGIPEG ALAGPEAPSA TPAQAK
359241 ----- YSEILDHFQV --GEA---- ITSAGIPEG ALAGPQTAA AVPTE
53282 ----- YSEILDHFQV --GEQKPNL TTTAGVPEP ALAGPEEAV PEASPAEPK SE
117789 ----- YSEILDHFQV --GEA---- TTSAGIPEG ALAGADGYV PSGASATAQT T
170586 ----- YSEILDHFQV --SDP---- GAADGEAPSG ALAGPEGQSR LGNGNVEHIG K
162119 ----- YSEILDHFQV --GDS---- -NLGTSVPEG ALAAPEDPNV PHPEAAQIAA TAE
560244 ----- YSEILDHFQV --GDS---- -RLNGVPEP ALAGPEDHAA TAAPAA
499279 ----- YSEILDHFQV --GDS---- -RLNGVPEP ALAGP
898207 ----- YSEILDHFQV --GENALEGD SVPEGALSSE GMEKAPIA TIPAQDAPV TGEVTAGN
500359 ----- YSEILDHFQV --QDST--- LLDNNIPEG SLAGP
390416 ----- YSEILDHFQV --DAS---- -VIDEARDP SLVG
61586 ----- YSEILGTS-- --IFC-SRS LCVINYSRP NHRFPSPWRD SNLVGRDTRG CSSGT
74488 ----- YSEILGQKR NHGCSCRSL S LTVFAFPRL VLADFHQIGD AALENADLAG APLGAMETP TAA
155373 ----- YSEILDPHV --DEAQSFM GDVQQQVPG QAAQAPFA
56185 ----- YSEILDPHI --EDSTD-- GPVAGATPQ QQA
14909 ----- YSEILDPHNI --ENTPDANE GPVAGAVPSP AA
176707 ----- YSEILDHFQV GEGE----- -SEHATVPIT SMPNGEIPKG AVIAAQPVPA Q
176721 ----- YSEILDHFQV GEGE----- -SEHATVPIT SMPNGEIPKG AVIAAQPVPA Q
240717 ----- YSEILDHFQV GEGE----- -SEHATVPIT SMPNGEIPKG AVIAAQPVPA Q
56428 ----- SEILDPHNI D-----G GVVSP
97915 ----- SEILDPHNI D-----G GVVSP
707387 ----- SEILDYHNV D-----A AQATEENSS
504013 ----- SEILDYHNV D-----S QAPAEEN
37843 ----- SEILDYHNV D-----A AGEMENGS
507853 ----- SEILDYHNI D-----S QQTTEVPPAE NGSS
338747 ----- SEILDYHNV D-----A AQQAGE
49060 ----- SEILDYHNV D-----S ANN---GEG QENGA
147551 ----- SEILDYHNV D-----Q GNDPTAAGGL TENGAA
286873 ----- SEILDYHNV D-----S ANGEDPHGE LTGAA
193904 ----- SEILDYHNV E-----A SDVEGAEDN EAVP
189288 ----- SEILDYHNV D-----N QQA
198339 ----- SEILDYHNV D-----G V
2140409 ----- SEILDYHNV E-----A ASVQMEDQQ YLAQ
642177 ----- SEILDYHNV E-----A ASVAA-QDP FLAQ
498471 ----- SEILDYHNA E-----A ANVAQ-HEQ FLGQ
784216 ----- TEILDYHNA E-----A GVAHQLEDE QYGMQ
128268 ----- SEILDYHNV E-----A SQQMPFDEV SISQ
246689 ----- SEILDYHNV D-----T DMSQL--DEQ MNGQ
1081594 ----- SEILDYHNI E-----G GVPNM--DEQ
603877 ----- SEILDYHNV E-----T GGDNHVMEF TNGQ

```



Table with multiple columns containing sequence alignment data, including identifiers, alignment characters, and sequence fragments.

AtMPK18
AtMPK19
AtMPK20
OsmPK20-1
OsmPK20-4
OsmPK20-5
OsmPK20-3
AtMPK16
OsmPK16-1
AtMPK17
AtMPK8
AtMPK15
OsmPK17-1
AtMPK9
